# Supplementary material for: Synthesis of 2-acylfurans from 3-(1-alkynyl)-2-alken-1-ones via the oxidation of gold–carbene intermediates by H2O2
Source: Royal Society of Chemistry journal article supplement (doi:10.1039/c0dt00024h), 2010-01-01

## Supporting information

Tao Wang<sup>1</sup>, and Junliang Zhang\*<sup>1,2</sup>

*<sup>1</sup>Shanghai Key Laboratory of Green Chemistry and Chemical Processes, Department of Chemistry, East China Normal University, 3663 N. Zhongshan Road, Shanghai 200062 and <sup>2</sup>State Key Laboratory of Organometallic Chemistry, Shanghai Institute of Organic Chemistry, Chinese Academy of Sciences, 354 Fenglin Road, Shanghai 200032, China*

*Fax:(+86)-021-6223-5039; e-mail : jlzhang@chem.ecnu.edu.cn*

## General Information

All reactions were carried out without special operation and commercial available reagents were used directly.  $^1\text{H}$  and  $^{13}\text{C}$  NMR spectra were measured at 300 and 75 MHz in  $\text{CDCl}_3$ . Splitting patterns of an apparent multiplet associated with an averaged coupling constant were designed as s (singlet), d (doublet), t (triplet), q (quartet), m (multiplet), and br (broadened).

## General procedure for synthesis of substrates

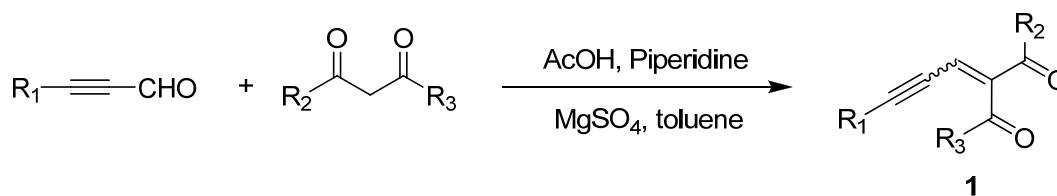

**Typical procedure for synthesis of substrates 1:** To a solution of the aldehyde<sup>1</sup> (12 mmol) in 40 mL of toluene, AcOH (360 mg, 6 mmol), piperidine (86 mg, 1 mmol), MgSO<sub>4</sub> (240 mg, 2 mmol) and 2,4-dione (10 mmol) were added, and the resulting mixture was stirred at 30 °C until the reaction was completed (monitored by TLC). Then the reaction mixture was added water (30 mL), and extracted with ethyl acetate (3 × 30 mL). The combined organic layers were washed with brine, dried over magnesium sulfate and concentrated under vacuo. The crude residue was purified by flash chromatography on silica gel (hexanes : EtOAc = 10 : 1) to give the desired products.

1. 3-(3-phenylprop-2-ynylidene)pentane-2,4-dione (**1a**).

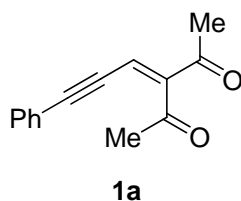

The reaction of 3-phenylpropionaldehyde (1.56 g, 12 mmol), AcOH (360 mg, 6 mmol), piperidine (86 mg, 1 mmol), MgSO<sub>4</sub> (240 mg, 2 mmol) and pentane-2,4-dione (1.00 g, 10 mmol) in toluene (40 mL) at 30 °C for 6 h to afford 1.72 g of **1a** (81% yield) as a yellow solid (R<sub>f</sub>: 0.43, hexane / EtOAc = 5:1). m.p. 58 – 60 °C; <sup>1</sup>H NMR (300 MHz, CDCl<sub>3</sub>): δ = 7.47 (d, 2 H, *J* = 7.8 Hz); 7.44 - 7.35 (m, 3 H); 6.94 (s, 1 H); 2.57 (s, 3 H); 2.37 (s, 3 H). <sup>13</sup>C NMR (75.4 MHz, CDCl<sub>3</sub>): δ = 200.84, 195.54, 149.38, 132.09, 130.13, 128.61, 122.25, 121.59, 107.03, 85.26, 31.02, 27.42 ppm, MS (EI, 70 ev) m/z (%): 212 (M<sup>+</sup>, 89.79), 155 (100). Anal calcd for C<sub>14</sub>H<sub>12</sub>O<sub>2</sub>: C, 79.22; H, 5.70; found: C, 79.06; H, 5.70.

2. 3-(3-(4-methoxyphenyl)prop-2-ynylidene)pentane-2,4-dione (**1b**).

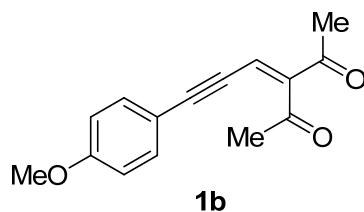

The reaction of 3-(4-methoxyphenyl)propionaldehyde (1.92 g, 12 mmol), AcOH (360 mg, 6 mmol), piperidine (86 mg, 1 mmol), MgSO<sub>4</sub> (240 mg, 2 mmol) and pentane-2,4-dione (1.00 g, 10 mmol) in toluene (40 mL) at 30 °C for 6 h to afford 1.32 g of **1b** (51% yield) as a yellow solid (Rf: 0.30, hexane / EtOAc = 5:1). m.p. 59 – 61 °C; <sup>1</sup>H NMR (300 MHz, CDCl<sub>3</sub>): δ = 7.42 (d, 2 H, *J* = 8.4 Hz); 6.96 (s, 1 H); 6.88 (d, 2 H, *J* = 8.4 Hz); 3.83 (s, 3 H); 2.36 (s, 3 H). <sup>13</sup>C NMR (75.4 MHz, CDCl<sub>3</sub>): δ = 201.21, 195.67, 161.20, 148.21, 133.98, 123.10, 114.33, 113.61, 85.09, 55.40, 31.07, 27.48 ppm, MS (EI, 70 ev) *m/z* (%): 242 (M<sup>+</sup>, 100). HRMS calcd for C<sub>15</sub>H<sub>14</sub>O<sub>3</sub>: 242.0943, found: 242.0942.

3. 3-(3-p-tolylprop-2-ynylidene)pentane-2,4-dione (**1c**).

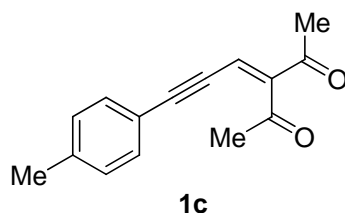

The reaction of 3-P-tolylpropionaldehyde (1.73 g, 12 mmol), AcOH (360 mg, 6 mmol), piperidine (86 mg, 1 mmol), MgSO<sub>4</sub> (240 mg, 2 mmol) and pentane-2,4-dione (1.00 g, 10 mmol) in toluene (40 mL) at 30 °C for 6 h to afford 1.28 g of **1c** (53% yield) as a yellow solid (Rf: 0.47, hexane / EtOAc = 5:1). m.p. 62 – 64 °C; <sup>1</sup>H NMR (300 MHz, CDCl<sub>3</sub>): δ = 7.37 (d, 2 H, *J* = 7.5 Hz); 7.17 (d, 2 H, *J* = 7.5 Hz); 6.95 (s, 1 H); 2.56 (s, 3 H); 2.38 (s, 3 H); 2.36 (s, 3 H). <sup>13</sup>C NMR (75.4 MHz, CDCl<sub>3</sub>): δ = 200.94, 195.62, 148.83, 140.79, 132.07, 129.39, 122.69, 118.51, 107.82, 85.07, 31.05, 27.45, 21.67 ppm, MS (EI, 70 ev) *m/z* (%): 226 (M<sup>+</sup>, 100). Anal calcd for C<sub>15</sub>H<sub>14</sub>O<sub>2</sub>: C, 79.62; H, 6.24; found: C, 79.39; H, 6.25.

4. 3-(3-(4-nitrophenyl)prop-2-ynylidene)pentane-2,4-dione (**1d**).

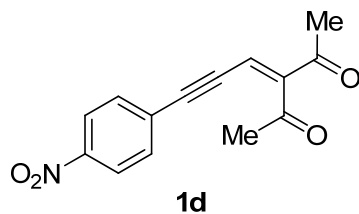

The reaction of 3-(4-nitrophenyl)propionaldehyde (2.10 g, 12 mmol), AcOH (360 mg, 6 mmol), piperidine (86 mg, 1 mmol), MgSO<sub>4</sub> (240 mg, 2 mmol) and pentane-2,4-dione (1.00 g, 10 mmol) in toluene (40 mL) at 30 °C for 8 h to afford 300 mg of **1d** (11% yield) as a yellow solid (Rf: 0.20, hexane / EtOAc = 5:1). m.p. 87 – 89 °C; <sup>1</sup>H NMR (300 MHz, CDCl<sub>3</sub>): δ = 8.23 (d, 2 H, *J* = 8.1 Hz); 7.63 (d, 2 H, *J* = 8.1 Hz); 6.88 (s, 1 H); 2.54 (s, 3 H); 2.39 (s, 3 H). <sup>13</sup>C NMR (75.4 MHz, CDCl<sub>3</sub>): δ = 200.41, 195.25, 151.05, 148.00, 132.82, 128.09, 123.79, 120.49, 102.89, 88.84, 30.97, 27.29 ppm, MS (EI, 70 ev) *m/z* (%): 257 (M<sup>+</sup>, 100). HRMS calcd for C<sub>14</sub>H<sub>11</sub>NO<sub>4</sub>: 257.0688, found: 257.0688.

5. 3-(3-(naphthalen-1-yl)prop-2-ynylidene)pentane-2,4-dione (**1e**).

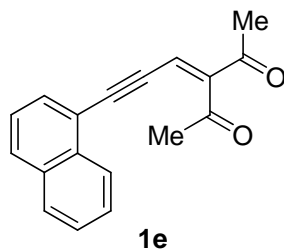

The reaction of 3-(naphthalen-1-yl)propionaldehyde (2.16 g, 12 mmol), AcOH (360 mg, 6 mmol), piperidine (86 mg, 1 mmol), MgSO<sub>4</sub> (240 mg, 2 mmol) and pentane-2,4-dione (1.00 g, 10 mmol) in toluene (40 mL) at 30 °C for 10 h to afford 2.00 g of **1e** (72% yield) as a yellow solid (Rf: 0.37, hexane / EtOAc = 5:1). m.p. 63 – 65 °C; <sup>1</sup>H NMR (300 MHz, CDCl<sub>3</sub>): δ = 8.25 (d, 1 H, *J* = 8.4 Hz); 7.92 - 7.85 (m, 2 H); 7.72 (d, 1 H, *J* = 7.2 Hz); 7.63 (t, 1 H, *J* = 7.5 Hz); 7.55 (t, 1 H, *J* = 7.5 Hz); 7.46 (t, 1 H, *J* = 7.5 Hz); 7.06 (s, 1 H); 2.60 (s, 3 H); 2.41 (s, 3 H). <sup>13</sup>C NMR (75.4 MHz, CDCl<sub>3</sub>): δ = 201.00, 195.62, 149.21, 133.09, 133.03, 131.95, 130.86, 128.42, 127.53, 126.80, 125.67, 125.15, 122.32, 119.17, 105.43, 89.78, 31.08, 27.18 ppm, MS (EI, 70 ev) *m/z* (%): 262 (M<sup>+</sup>, 58.39), 261 (100). HRMS calcd for C<sub>18</sub>H<sub>14</sub>O<sub>2</sub>: 262.0994, found: 262.0995.

6. 3-(hept-2-ynylidene)pentane-2,4-dione (**1f**).

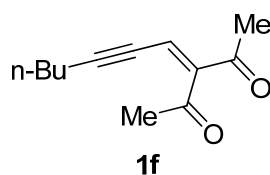

The reaction of hept-2-ynal (1.32 g, 12 mmol), AcOH (360 mg, 6 mmol), piperidine (86 mg, 1 mmol), MgSO<sub>4</sub> (240 mg, 2 mmol) and pentane-2,4-dione (1.00 g, 10 mmol) in toluene (40 mL) at 30 °C for 2 h to afford 1.29 g of **1f** (65% yield) as a yellow oil (Rf: 0.57, hexane / EtOAc = 5:1). <sup>1</sup>H NMR (300 MHz, CDCl<sub>3</sub>): δ = 6.65 (s, 1 H); 2.42 (s, 3 H); 2.40 (t, 2 H, J = 7.5 Hz); 2.26 (s, 3 H); 1.55 - 1.46 (m, 2 H); 1.43 - 1.31 (m, 2 H); 0.87 (t, 3 H, J = 7.2 Hz). <sup>13</sup>C NMR (75.4 MHz, CDCl<sub>3</sub>): δ = 201.15, 195.63, 149.45, 123.06, 110.26, 76.74, 30.75, 29.99, 27.03, 21.82, 19.76, 13.33 ppm, MS (EI, 70 ev) m/z (%): 192 (M<sup>+</sup>, 1.67), 135 (100). HRMS calcd for C<sub>12</sub>H<sub>16</sub>O<sub>2</sub>: 192.1150, found: 192.1149.

7. 4-(3-phenylprop-2-ynylidene)heptane-3,5-dione (**1g**).

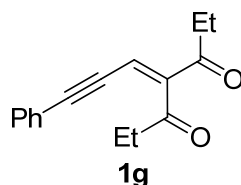

The reaction of 3-phenylpropionaldehyde (1.56 g, 12 mmol), AcOH (360 mg, 6 mmol), piperidine (86 mg, 1 mmol), MgSO<sub>4</sub> (240 mg, 2 mmol) and heptane-3,5-dione (1.28 g, 10 mmol) in toluene (40 mL) at 30 °C for 6 h to afford 1.72 g of **1g** (67% yield) as a yellow oil (Rf: 0.60, hexane / EtOAc = 5:1). <sup>1</sup>H NMR (300 MHz, CDCl<sub>3</sub>): δ = 7.44 (d, 2 H, J = 7.8 Hz); 7.43 - 7.32 (m, 3 H); 6.88 (s, 1 H); 2.87 (q, 2 H, J = 7.2 Hz); 2.66 (q, 2 H, J = 7.2 Hz); 1.20 (t, 3 H, J = 7.2 Hz); 1.12 (t, 3 H, J = 7.2 Hz). <sup>13</sup>C NMR (75.4 MHz, CDCl<sub>3</sub>): δ = 204.77, 198.10, 149.82, 132.01, 129.92, 128.57, 121.68, 120.24, 105.43, 85.05, 36.75, 32.67, 7.89, 7.61 ppm, MS (EI, 70 ev) m/z (%): 240 (M<sup>+</sup>, 38.57), 155 (100). HRMS calcd for C<sub>16</sub>H<sub>16</sub>O<sub>2</sub>: 240.1150, found: 240.1149.

8. 1,3-diphenyl-2-(3-phenylprop-2-ynylidene)propane-1,3-dione (**1h**).

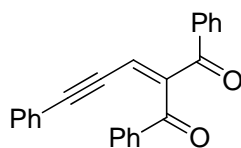

**1h**

The reaction of 3-phenylpropiolaldehyde (1.56 g, 12 mmol), AcOH (360 mg, 6 mmol), piperidine (86 mg, 1 mmol), MgSO<sub>4</sub> (240 mg, 2 mmol) and 1,3-diphenylpropane-1,3-dione (2.24 g, 10 mmol) in toluene (40 mL) at 60 °C for 10 h to afford 1.69 g of **1h** (48% yield) as a yellow solid (Rf: 0.50, hexane / EtOAc = 5:1). m.p. 95 – 97 °C; <sup>1</sup>H NMR (300 MHz, CDCl<sub>3</sub>): δ = 8.04 (d, 2 H, *J* = 7.8 Hz); 7.84 (d, 2 H, *J* = 7.8 Hz); 7.63 - 7.43 (m, 6 H); 7.34 - 7.21 (m, 3 H); 7.08 (d, 2 H, *J* = 7.8 Hz); 6.99 (s, 1 H). <sup>13</sup>C NMR (75.4 MHz, CDCl<sub>3</sub>): δ = 194.06, 192.84, 147.73, 136.73, 136.32, 133.71, 132.91, 131.94, 129.71, 129.60, 129.23, 128.71, 128.54, 128.26, 124.32, 121.51, 106.46, 85.29 ppm, MS (EI, 70 ev) *m/z* (%): 336 (M<sup>+</sup>, 34.84), 105 (100). HRMS calcd for C<sub>24</sub>H<sub>16</sub>O<sub>2</sub>: 336.1150, found: 336.1151.

9. 1-phenyl-2-(3-phenylprop-2-ynylidene)butane-1,3-dione (**1i**).

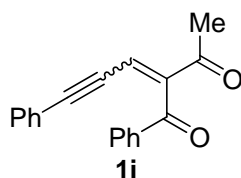

The reaction of 3-phenylpropiolaldehyde (1.56 g, 12 mmol), AcOH (360 mg, 6 mmol), piperidine (86 mg, 1 mmol), MgSO<sub>4</sub> (240 mg, 2 mmol) and 1-phenylbutane-1,3-dione (1.62 g, 10 mmol) in toluene (40 mL) at 60 °C for 6 h to afford 173 mg of (*E*)-**1i** (6% yield) as a yellow oil (Rf: 0.53, hexane / EtOAc = 5:1) and 1.53 g of (*Z*)-**1i** (55% yield) as a yellow solid (Rf: 0.43, hexane / EtOAc = 5:1). The stereochemistry was determined by NOESY spectra.

(*Z*)-**1i**: m.p. 82-84 °C; <sup>1</sup>H NMR (300 MHz, CDCl<sub>3</sub>): δ = 7.98 (d, 2 H, *J* = 7.2 Hz); 7.60 (t, 1 H, *J* = 7.5 Hz); 7.49 (t, 2 H, *J* = 7.2 Hz); 7.29 - 7.14 (m, 4 H); 6.99 (d, 2 H, *J* = 7.2 Hz); 2.35 (s, 3 H). <sup>13</sup>C NMR (75.4 MHz, CDCl<sub>3</sub>): δ = 195.08, 194.11, 147.72, 136.02, 133.91, 131.83, 129.68, 129.39, 128.72, 128.19, 122.27, 121.33, 106.34, 85.33, 27.36 ppm, MS (EI, 70 ev) *m/z* (%): 274 (M<sup>+</sup>, 70.26), 105 (100). HRMS calcd

for C<sub>19</sub>H<sub>14</sub>O<sub>2</sub>: 274.0994, found: 274.0993.

(*E*)-**1i**: <sup>1</sup>H NMR (300 MHz, CDCl<sub>3</sub>): δ = 7.79 (d, 2 H, *J* = 7.2 Hz); 7.59 (t, 1 H, *J* = 7.2 Hz); 7.54 - 7.36 (m, 8 H); 6.68 (s, 1 H); 2.60 (s, 3 H). <sup>13</sup>C NMR (75.4 MHz, CDCl<sub>3</sub>): δ = 198.12, 194.20, 148.46, 136.71, 133.28, 132.12, 130.04, 129.34, 128.63, 128.58, 123.17, 121.76, 106.51, 85.68, 30.64 ppm, MS (EI, 70 ev) *m/z* (%): 274 (M<sup>+</sup>, 70.26), 105 (100). HRMS calcd for C<sub>19</sub>H<sub>14</sub>O<sub>2</sub>: 274.0994, found: 274.0993.

10. methyl 2-acetyl-5-phenylpent-2-en-4-ynoate (**1j**).

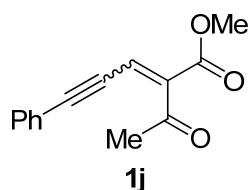

The reaction of 3-phenylpropionaldehyde (1.56 g, 12 mmol), AcOH (360 mg, 6 mmol), piperidine (86 mg, 1 mmol), MgSO<sub>4</sub> (240 mg, 2 mmol) and methyl 3-oxobutanoate (1.16 g, 10 mmol) in toluene (40 mL) at 30 °C for 3 h to afford 1.66 g of **1j** (68% yield, *E* / *Z* = 1.2 / 1) as a yellow oil [Rf: (*E*)-**1j**, 0.53; (*Z*)-**1j**, 0.47, hexane / EtOAc = 5:1]. The stereochemistry was determined by NOESY spectra.

Major (*E*): <sup>1</sup>H NMR (300 MHz, CDCl<sub>3</sub>): δ = 7.47 (d, 2 H, *J* = 7.8 Hz); 7.46 - 7.31 (m, 3 H); 7.04 (s, 1 H); 3.82 (s, 3 H); 2.52 (s, 3 H). <sup>13</sup>C NMR (75.4 MHz, CDCl<sub>3</sub>): δ = 198.43, 164.30, 141.81, 132.18, 129.94, 128.49, 123.41, 121.63, 105.42, 85.01, 52.50, 30.46 ppm, MS (EI, 70 ev) *m/z* (%): 228 (M<sup>+</sup>, 100), HRMS calcd for C<sub>14</sub>H<sub>12</sub>O<sub>3</sub>: 228.0786, found: 228.0785.

Minor (*Z*): <sup>1</sup>H NMR (300 MHz, CDCl<sub>3</sub>): δ = 7.46 (d, 2 H, *J* = 7.8 Hz); 7.45 - 7.30 (m, 3 H); 7.01 (s, 1 H); 3.90 (s, 3 H); 2.38 (s, 3 H). <sup>13</sup>C NMR (75.4 MHz, CDCl<sub>3</sub>): δ = 193.73, 165.61, 141.01, 132.16, 129.94, 128.45, 124.88, 121.70, 106.60, 85.37, 52.16, 27.48 ppm, MS (EI, 70 ev) *m/z* (%): 228 (M<sup>+</sup>, 100), HRMS calcd for C<sub>14</sub>H<sub>12</sub>O<sub>3</sub>: 228.0786, found: 228.0785.

11. ethyl 2-benzoyl-5-phenylpent-2-en-4-ynoate (**1k**).

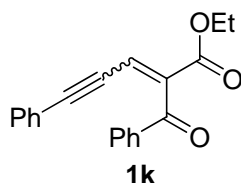



The reaction of 3-phenylpropionaldehyde (1.56 g, 12 mmol), AcOH (360 mg, 6 mmol), piperidine (86 mg, 1 mmol), MgSO<sub>4</sub> (240 mg, 2 mmol) and ethyl 3-oxo-3-phenylpropanoate (1.92 g, 10 mmol) in toluene (40 mL) at 60 °C for 7 h to afford 1.27 g of **1k** (40% yield, major / minor = 5 / 1) as mixture yellow oil (Rf: 0.57, hexane / EtOAc = 5:1). <sup>1</sup>H NMR (300 MHz, CDCl<sub>3</sub>): δ = [7.98 (d, 1.66 H, *J* = 7.8 Hz), 7.81 (d, 0.34 H, *J* = 7.8 Hz)]; 7.63 - 7.43 (m, 4 H); 7.39 - 7.18 (m, 3 H); 7.09 (s, 1 H); [7.07 (s, 0.83 H), 6.82 (s, 0.17 H)]; 4.24 (q, 2 H, *J* = 7.2 Hz); 1.21 (t, 3 H, *J* = 7.2 Hz). <sup>13</sup>C NMR (75.4 MHz, CDCl<sub>3</sub>): δ = (192.71, 192.00), (164.22, 163.87), (141.08, 141.02), (136.83, 135.98), (133.72, 133.06), (132.71, 131.90), (129.81, 129.59), 129.34, (128.91, 128.63), (128.45, 128.20), 125.55, (121.97, 121.45), (106.07, 104.70), (85.45, 84.76), (61.64, 61.32), (13.92, 13.89) ppm, MS (EI, 70 ev) *m/z* (%): 304 (M<sup>+</sup>, 25.26), 105 (100). HRMS calcd for C<sub>20</sub>H<sub>16</sub>O<sub>3</sub>: 304.1099, found: 304.1098.

12. 1,5-diphenyl-2-(phenylsulfonyl)pent-2-en-4-yn-1-one (**1l**).

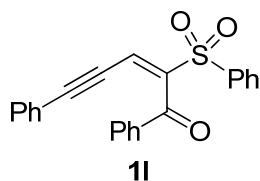

The reaction of 3-phenylpropionaldehyde (1.56 g, 12 mmol), AcOH (360 mg, 6 mmol), piperidine (86 mg, 1 mmol), MgSO<sub>4</sub> (240 mg, 2 mmol) and 1-phenyl-2-(phenylsulfonyl)ethanone (2.60 g, 10 mmol) in toluene (40 mL) at 60 °C for 6 h to afford 3.12 g of **1l** (80% yield) as a yellow oil (as a single isomer of (*E*)-isomer; Rf: 0.33, hexane / EtOAc = 5:1). <sup>1</sup>H NMR (300 MHz, CDCl<sub>3</sub>): δ = 7.95 (d, 4 H, *J* = 7.2 Hz); 7.62 - 7.42 (m, 7 H); 7.26 (t, 1 H, *J* = 7.2 Hz); 7.16 (t, 2 H, *J* = 7.5 Hz); 6.89 (d, 2 H, *J* = 8.1 Hz). <sup>13</sup>C NMR (75.4 MHz, CDCl<sub>3</sub>): δ = 189.68, 148.46, 139.40, 135.68, 134.12, 133.74, 131.76, 130.02, 129.60, 128.95, 128.55, 128.43, 128.14, 124.03, 120.50, 107.59, 83.07 ppm, MS (EI, 70 ev) *m/z* (%): 372 (M<sup>+</sup>, 14.43), 105 (100). HRMS calcd for C<sub>23</sub>H<sub>16</sub>O<sub>3</sub>S: 372.0820, found: 372.0821.

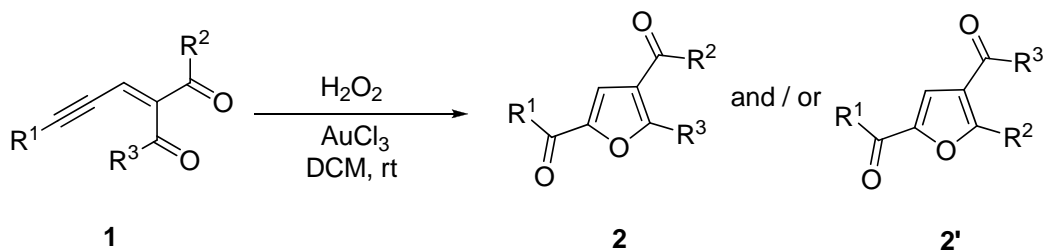

**Typical procedure for synthesis of 2-acylfurans :** To a solution of **1** (0.5 mmol) and AuCl<sub>3</sub> (0.025 mmol, 7.6 mg) in DCM (5 mL), H<sub>2</sub>O<sub>2</sub> (30%, 1.5 mmol, 170 mg) was added. The resulting solution was stirred at rt until the reaction was completed (monitored by TLC). After removal of solvent under reduced pressure, the residue was purified by column chromatography on silica gel (hexanes : AcOEt = 10 : 1) to give the desired product **2**.

13. 1-(5-benzoyl-2-methylfuran-3-yl)ethanone (**2a**).

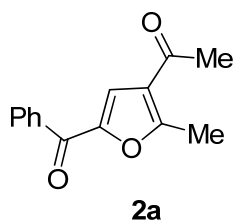

The reaction of **1a** (106 mg, 0.5 mmol), H<sub>2</sub>O<sub>2</sub> (30%) (170 mg, 1.5 mmol) and AuCl<sub>3</sub> (0.025 mmol, 7.6 mg) in DCM (5 mL) was carried out at rt for 2 h to afford **2a** (99.9 mg) in 88% yield as a white solid (R<sub>f</sub>: 0.42, hexane / EtOAc = 3:1). m.p. 126-128 °C; <sup>1</sup>H NMR (300 MHz, CDCl<sub>3</sub>): δ = 7.86 (d, 2 H, *J* = 7.5 Hz); 7.55 (t, 1 H, *J* = 7.5 Hz); 7.44 (t, 2 H, *J* = 7.5 Hz); 7.37 (s, 1 H); 2.70 (s, 3 H); 2.43 (s, 3 H). <sup>13</sup>C NMR (75.4 MHz, CDCl<sub>3</sub>): δ = 193.01, 181.85, 162.87, 149.21, 136.61, 132.60, 128.87, 128.35, 123.02, 120.55, 28.86, 14.72 ppm, MS (EI, 70 eV) *m/z* (%): 228 (M<sup>+</sup>, 70.01), 213 (100). HRMS calcd for C<sub>14</sub>H<sub>12</sub>O<sub>3</sub>: 228.0786, found: 228.0785.

14. 1-(5-(4-methoxybenzoyl)-2-methylfuran-3-yl)ethanone (**2b**).

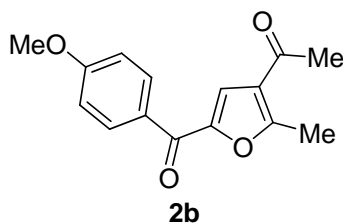

The reaction of **1b** (121 mg, 0.5 mmol), H<sub>2</sub>O<sub>2</sub> (30%) (170 mg, 1.5 mmol) and

AuCl<sub>3</sub> (0.025 mmol, 7.6 mg) in DCM (5 mL) was carried out at rt for 17 h to afford **2b** (95 mg) in 74% yield as a yellow solid (Rf: 0.30, hexane / EtOAc = 3:1). m.p. 139-140 °C; <sup>1</sup>H NMR (300 MHz, CDCl<sub>3</sub>): δ = 7.98 (d, 2 H, *J* = 8.4 Hz); 7.38 (s, 1 H); 6.98 (d, 2 H, *J* = 8.4 Hz); 3.88 (s, 3 H); 2.72 (s, 3 H); 2.45 (s, 3 H). <sup>13</sup>C NMR (75.4 MHz, CDCl<sub>3</sub>): δ = 193.34, 180.66, 163.46, 162.46, 149.84, 131.54, 129.39, 123.07, 119.71, 113.82, 55.47, 29.04, 14.90 ppm, MS (EI, 70 ev) *m/z* (%): 258 (M<sup>+</sup>, 79.40), 135 (100). HRMS calcd for C<sub>15</sub>H<sub>14</sub>O<sub>4</sub>: 258.0892, found: 258.0891.

15. 1-(2-methyl-5-(4-methylbenzoyl)furan-3-yl)ethanone (**2c**).

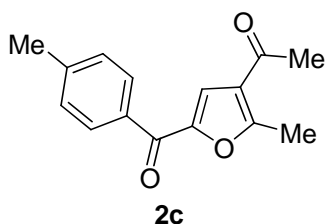

The reaction of **1c** (113 mg, 0.5 mmol), H<sub>2</sub>O<sub>2</sub> (30%) (170 mg, 1.5 mmol) and AuCl<sub>3</sub> (0.025 mmol, 7.6 mg) in DCM (5 mL) was carried out at rt for 11 h to afford **2c** (102 mg) in 84% yield as a yellow solid (Rf: 0.45, hexane / EtOAc = 3:1). m.p. 132-133 °C; <sup>1</sup>H NMR (300 MHz, CDCl<sub>3</sub>): δ = 7.84 (d, 2 H, *J* = 7.8 Hz); 7.37 (s, 1 H); 7.30 (d, 2 H, *J* = 7.8 Hz); 2.72 (s, 3 H); 2.45 (s, 3 H); 2.43 (s, 3 H). <sup>13</sup>C NMR (75.4 MHz, CDCl<sub>3</sub>): δ = 193.19, 181.72, 162.73, 149.60, 143.61, 134.11, 129.20, 129.16, 123.08, 120.18, 28.96, 21.56, 14.83 ppm, MS (EI, 70 ev) *m/z* (%): 242 (M<sup>+</sup>, 68.18), 227 (100). HRMS calcd for C<sub>15</sub>H<sub>14</sub>O<sub>3</sub>: 242.0943, found: 242.0943.

16. 1-(2-methyl-5-(4-nitrobenzoyl)furan-3-yl)ethanone (**2d**).

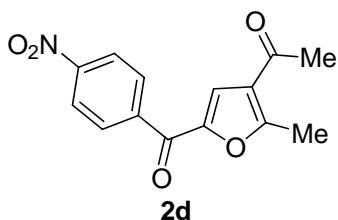

The reaction of **1d** (103 mg, 0.4 mmol), H<sub>2</sub>O<sub>2</sub> (30%) (136 mg, 1.2 mmol) and AuCl<sub>3</sub> (0.020 mmol, 6.1 mg) in DCM (4 mL) was carried out at rt for 11 h to afford **2d** (89 mg) in 82% yield as a yellow solid (Rf: 0.30, hexane / EtOAc = 3:1). m.p. 199-200 °C; <sup>1</sup>H NMR (300 MHz, CDCl<sub>3</sub>): δ = 8.36 (d, 2 H, *J* = 7.8 Hz); 8.10 (d, 2 H, *J* = 7.8 Hz); 7.47 (s, 1 H); 2.75 (s, 3 H); 2.48 (s, 3 H). <sup>13</sup>C NMR (75.4 MHz, CDCl<sub>3</sub>):

$\delta = 192.89, 180.01, 163.92, 150.06, 149.04, 141.73, 130.10, 123.74, 123.60, 121.52, 29.06, 15.04$  ppm, MS (EI, 70 ev)  $m/z$  (%): 273 ( $M^+$ , 56.59), 258 (100). HRMS calcd for  $C_{14}H_{11}NO_5$ : 273.0637, found: 273.0638.

17. 1-(5-(1-naphthoyl)-2-methylfuran-3-yl)ethanone (**2e**).

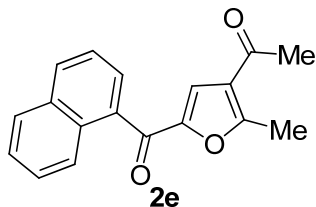

The reaction of **1e** (131 mg, 0.5 mmol),  $H_2O_2$  (30%) (170 mg, 1.5 mmol) and  $AuCl_3$  (0.025 mmol, 7.6 mg) in DCM (5 mL) was carried out at rt for 14.5 h to afford **2e** (89 mg) in 64% yield as a yellow solid (Rf: 0.39, hexane / EtOAc = 3:1). m.p. 122-123 °C;  $^1H$  NMR (300 MHz,  $CDCl_3$ ):  $\delta = 8.20$  (t, 1 H,  $J = 5.7$  Hz); 8.02 (d, 1 H,  $J = 8.1$  Hz); 7.94-7.86 (m, 1 H); 7.54 (d, 1 H,  $J = 6.9$  Hz); 7.53 (t, 3 H,  $J = 7.5$  Hz); 7.19 (s, 1 H); 2.74 (s, 3 H); 2.38 (s, 3H).  $^{13}C$  NMR (75.4 MHz,  $CDCl_3$ ):  $\delta = 193.08, 183.75, 163.83, 150.31, 134.64, 133.72, 131.94, 130.54, 128.38, 127.54, 127.36, 126.65, 125.09, 124.20, 123.30, 121.62, 28.95, 14.96$  ppm, MS (EI, 70 ev)  $m/z$  (%): 278 ( $M^+$ , 100). HRMS calcd for  $C_{18}H_{14}O_3$ : 278.0943, found: 278.0943.

18. 1-(4-acetyl-5-methylfuran-2-yl)pentan-1-one (**2f**).

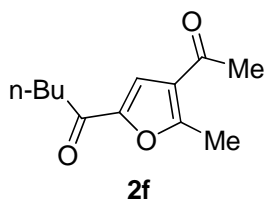

The reaction of **1f** (96 mg, 0.5 mmol),  $H_2O_2$  (30%) (170 mg, 1.5 mmol) and  $AuCl_3$  (0.025 mmol, 7.6 mg) in DCM (5 mL) was carried out at rt for 8 h to afford **2f** (66 mg) in 64% yield as a yellow oil (Rf: 0.52, hexane / EtOAc = 3:1).  $^1H$  NMR (300 MHz,  $CDCl_3$ ):  $\delta = 7.33$  (s, 1 H), 2.74 (t, 2 H,  $J = 7.5$  Hz); 2.62 (s, 3 H); 2.40 (s, 3 H); 1.69 - 1.59 (m, 2 H); 1.40 - 1.28 (m, 2 H); 0.89 (t, 3 H,  $J = 7.5$  Hz).  $^{13}C$  NMR (75.4 MHz,  $CDCl_3$ ):  $\delta = 193.20, 189.20, 161.99, 150.02, 123.01, 116.85, 37.96, 28.88, 26.24, 22.26, 14.68, 13.70$  ppm, MS (EI, 70 ev)  $m/z$  (%): 208 ( $M^+$ , 8.07), 166 (100). HRMS calcd for  $C_{12}H_{16}O_3$ : 208.1099, found: 208.1099.

19. 1-(5-benzoyl-2-ethylfuran-3-yl)propan-1-one (**2g**).

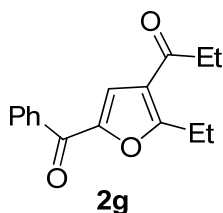

The reaction of **1g** (120 mg, 0.5 mmol), H<sub>2</sub>O<sub>2</sub> (30%) (170 mg, 1.5 mmol) and AuCl<sub>3</sub> (0.025 mmol, 7.6 mg) in DCM (5 mL) was carried out at rt for 3.5 h to afford **2g** (107 mg) in 83% yield as a yellow oil (Rf: 0.64, hexane / EtOAc = 3:1). <sup>1</sup>H NMR (300 MHz, CDCl<sub>3</sub>): δ = 7.90 (d, 2 H, *J* = 7.2 Hz); 7.56 (t, 1 H, *J* = 7.2 Hz); 7.46 (t, 2 H, *J* = 7.2 Hz); 7.39 (s, 1 H); 3.10 (q, 2 H, *J* = 7.5 Hz); 2.76 (q, 2 H, *J* = 7.5 Hz); 1.29 (t, 3 H, *J* = 7.5 Hz); 1.13 (t, 3 H, *J* = 7.5 Hz). <sup>13</sup>C NMR (75.4 MHz, CDCl<sub>3</sub>): δ = 196.03, 181.91, 167.58, 149.49, 136.84, 132.60, 129.01, 128.39, 121.72, 120.15, 34.28, 22.01, 11.55, 7.52 ppm, MS (EI, 70 ev) *m/z* (%): 256 (M<sup>+</sup>, 39.92), 227 (100). HRMS calcd for C<sub>16</sub>H<sub>16</sub>O<sub>3</sub>: 256.1099, found: 256.1100.

20. (5-phenylfuran-2,4-diyl)bis(phenylmethanone) (**2h**).

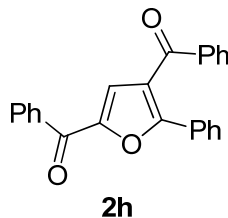

The reaction of **1h** (168 mg, 0.5 mmol), H<sub>2</sub>O<sub>2</sub> (30%) (170 mg, 1.5 mmol) and AuCl<sub>3</sub> (0.025 mmol, 7.6 mg) in DCM (5 mL) was carried out at rt for 10 h to afford **2h** (154 mg) in 87% yield as white solid (Rf: 0.61, hexane / EtOAc = 3:1). m.p. 131-132 °C; <sup>1</sup>H NMR (300 MHz, CDCl<sub>3</sub>): δ = 8.03 (d, 2 H, *J* = 7.5 Hz); 7.84 (m, 4 H); 7.65 - 7.35 (m, 10 H). <sup>13</sup>C NMR (75.4 MHz, CDCl<sub>3</sub>): δ = 190.71, 182.08, 158.82, 149.91, 137.18, 136.89, 133.42, 132.85, 130.37, 129.69, 129.24, 128.55, 128.45, 128.09, 123.09, 122.54 ppm, MS (EI, 70 ev) *m/z* (%): 352 (M<sup>+</sup>, 89.27), 105 (100). HRMS calcd for C<sub>24</sub>H<sub>16</sub>O<sub>3</sub>: 352.1099, found: 352.1100.

21. 1-(5-benzoyl-2-phenylfuran-3-yl)ethanone (**2i**) and (5-methylfuran-2,4-diyl)bis(phenylmethanone) (**2i'**).

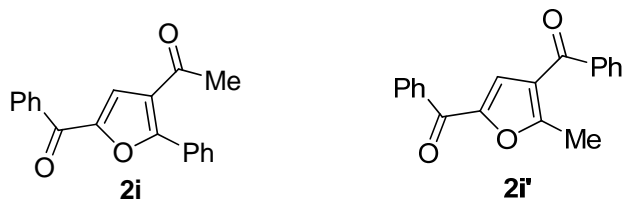

The reaction of (**Z**)-**1i** (137 mg, 0.5 mmol), H<sub>2</sub>O<sub>2</sub> (30%) (170 mg, 1.5 mmol) and AuCl<sub>3</sub> (0.025 mmol, 7.6 mg) in DCM (5 mL) was carried out at rt for 12 h to afford **2i** (129 mg) in 89% yield as a yellow solid (Rf: 0.48, hexane / EtOAc = 3:1).

The reaction of (**E**)-**1i** (137 mg, 0.5 mmol), H<sub>2</sub>O<sub>2</sub> (30%) (170 mg, 1.5 mmol) and AuCl<sub>3</sub> (0.025 mmol, 7.6 mg) in DCM (5 mL) was carried out at rt for 12 h to afford **2i** (34 mg) in 23% yield as a yellow solid and **2i'** (82 mg) in 57% yield as a yellow oil (Rf: 0.61, hexane / EtOAc = 3:1).

**2i**: m.p. 117-118 °C; <sup>1</sup>H NMR (300 MHz, CDCl<sub>3</sub>): δ = 8.03 - 7.99 (m, 4 H); 7.65 - 7.48 (m, 7 H); 2.48 (s, 3 H). <sup>13</sup>C NMR (75.4 MHz, CDCl<sub>3</sub>): δ = 193.11, 182.05, 159.69, 150.07, 136.78, 132.91, 130.91, 129.24, 129.06, 128.75, 128.58, 128.45, 123.82, 121.90, 29.77 ppm, MS (EI, 70 eV) m/z (%): 290 (M<sup>+</sup>, 75.50), 275 (100). HRMS calcd for C<sub>19</sub>H<sub>14</sub>O<sub>3</sub>: 290.0943, found: 290.0943.

**2i'**: <sup>1</sup>H NMR (300 MHz, CDCl<sub>3</sub>) δ = 7.92 (d, 2 H, *J* = 7.2 Hz); 7.78 (d, 2 H, *J* = 7.2 Hz); 7.56 (t, 2 H, *J* = 7.2 Hz); 7.47 (t, 4 H, *J* = 7.2 Hz); 7.34 (s, 1 H); 2.66 (s, 3 H). <sup>13</sup>C NMR (75.4 MHz, CDCl<sub>3</sub>): δ = 190.03, 182.01, 163.73, 149.35, 138.05, 136.78, 132.69, 129.03, 128.86, 128.51, 128.44, 122.36, 121.71, 14.62 ppm, MS (EI, 70 eV) m/z (%): 290 (M<sup>+</sup>, 35.91), 105 (100). HRMS calcd for C<sub>19</sub>H<sub>14</sub>O<sub>3</sub>: 290.0943, found: 290.0942.

22. methyl 5-benzoyl-2-methylfuran-3-carboxylate (**2j**).

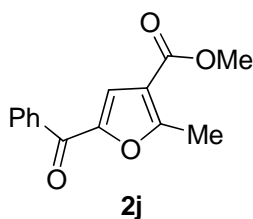

The reaction of (**E**)-**1j** (114 mg, 0.5 mmol), H<sub>2</sub>O<sub>2</sub> (30%) (170 mg, 1.5 mmol) and AuCl<sub>3</sub> (0.025 mmol, 7.6 mg) in DCM (5 mL) was carried out at rt for 36 h to afford **2j** (98 mg) in 79% yield as a yellow oil (Rf: 0.61, hexane / EtOAc = 3:1); <sup>1</sup>H NMR (300

MHz, CDCl<sub>3</sub>):  $\delta$  = 7.78 (d, 2 H,  $J$  = 7.5 Hz); 7.49 - 7.33 (m, 3 H); 3.72 (s, 3 H); 2.59 (s, 3 H). <sup>13</sup>C NMR (75.4 MHz, CDCl<sub>3</sub>):  $\delta$  = 181.65, 163.58, 162.88, 149.14, 136.58, 132.44, 128.74, 128.22, 121.09, 115.42, 51.39, 13.98 ppm, MS (EI, 70 ev)  $m/z$  (%): 244 ( $M^+$ , 100). HRMS calcd for C<sub>14</sub>H<sub>12</sub>O<sub>4</sub>: 244.0736, found: 244.0733.

The title compound could be also afforded from the (**Z**)-**1j** in 66% yield.

23. ethyl 5-benzoyl-2-phenylfuran-3-carboxylate (**2k**).

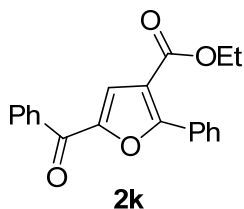

The reaction of **1k** (152 mg, 0.5 mmol), H<sub>2</sub>O<sub>2</sub> (30%) (170 mg, 1.5 mmol) and AuCl<sub>3</sub> (0.025 mmol, 7.6 mg) in DCM (5 mL) was carried out at rt for 16 h to afford **2k** (117 mg) in 73% yield as a white solid (Rf: 0.70, hexane / EtOAc = 3:1). m.p. 91-92 °C; <sup>1</sup>H NMR (300 MHz, CDCl<sub>3</sub>):  $\delta$  = 8.16 - 8.08 (m, 2 H); 8.01 (d, 2 H,  $J$  = 7.8 Hz); 7.63 (t, 3 H,  $J$  = 7.2 Hz); 7.56 - 7.48 (m, 5 H); 4.34 (q, 2 H,  $J$  = 7.2 Hz); 1.35 (t, 3 H,  $J$  = 7.2 Hz). <sup>13</sup>C NMR (75.4 MHz, CDCl<sub>3</sub>):  $\delta$  = 182.12, 162.57, 160.67, 149.76, 136.97, 132.84, 130.69, 129.24, 129.10, 128.58, 128.29, 123.01, 115.87, 61.08, 14.18 ppm, MS (EI, 70 ev)  $m/z$  (%): 320 ( $M^+$ , 100). Anal calcd for C<sub>20</sub>H<sub>16</sub>O<sub>4</sub>: C, 74.99; H, 5.03; found: C, 75.00; H, 5.01.

24. phenyl(5-phenyl-4-(phenylsulfonyl)furan-2-yl)methanone (**2l**).

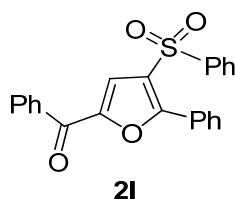

The reaction of **1l** (186 mg, 0.5 mmol), H<sub>2</sub>O<sub>2</sub> (30%) (170 mg, 1.5 mmol) and AuCl<sub>3</sub> (0.025 mmol, 7.6 mg) in DCM (5 mL) was carried out at rt for 16 h to afford **2l** (153 mg) in 79% yield as a colorless oil (Rf: 0.45, hexane / EtOAc = 3:1). <sup>1</sup>H NMR (300 MHz, CDCl<sub>3</sub>):  $\delta$  = 7.99 - 7.95 (m, 4 H); 7.79 (d, 2 H,  $J$  = 7.5 Hz); 7.65 - 7.55 (m, 2 H); 7.58 - 7.36 (m, 8 H). <sup>13</sup>C NMR (75.4 MHz, CDCl<sub>3</sub>):  $\delta$  = 181.45, 157.88, 149.36, 140.75, 136.18, 133.58, 133.10, 131.18, 129.06, 129.01, 128.57, 128.42, 127.03,

127.00, 126.06, 121.54 ppm, MS (EI, 70 ev)  $m/z$  (%): 388 ( $M^+$ , 55.20), 105 (100).  
HRMS calcd for  $C_{23}H_{16}O_4S$ : 388.0769, found: 388.0770.

25. 1,1'-(5,5'-(1,2-diphenylethene-1,2-diyl)bis(2-methylfuran-5,3-diyl))diethanone (**3**).

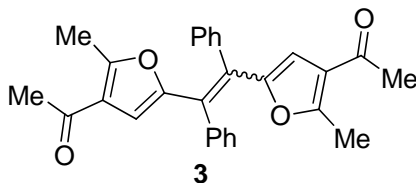

The solution of **1a** (0.5 mmol, 106 mg),  $Ph_3PAuCl$  (0.025 mmol, 12.4 mg) and  $AgOTf$  (0.025 mmol, 6.4 mg) was stirred in DCM (5 mL) at rt for 2 h to afford **3** in 93% yield ( $E/Z = 1.5 / 1$ ) as yellow solid.

(*E*)-isomer (Rf: 0.52, hexane / EtOAc = 3:1): mp. 176-177 °C;  $^1H$  NMR (300 MHz,  $CDCl_3$ ):  $\delta = 7.37 - 7.30$  (m, 10 H); 5.91 (s, 2 H); 2.20 (s, 12 H).  $^{13}C$  NMR (75.4 MHz,  $CDCl_3$ ):  $\delta = 193.95, 157.86, 152.43, 139.95, 130.04, 128.40, 128.07, 127.63, 122.53, 112.81, 28.89, 14.08$  ppm, MS (EI, 70 ev)  $m/z$  (%): 424 ( $M^+$ , 13.64), 43 (100).  
HRMS calcd for  $C_{28}H_{24}O_4$ : 424.1675, found: 424.1675.

(*Z*)-isomer (Rf: 0.39, hexane / EtOAc = 3:1): mp. 149-150 °C;  $^1H$  NMR (300 MHz,  $CDCl_3$ ):  $\delta = 7.14$  (s, 10 H); 6.29 (s, 2 H); 2.48 (s, 6 H); 2.34 (s, 6 H).  $^{13}C$  NMR (75.4 MHz,  $CDCl_3$ ):  $\delta = 194.15, 157.76, 153.24, 139.62, 131.35, 129.36, 127.84, 127.51, 122.72, 112.47, 29.11, 14.37$  ppm, MS (EI, 70 ev)  $m/z$  (%): 424 ( $M^+$ , 100).  
HRMS calcd for  $C_{28}H_{24}O_4$ : 424.1675, found: 424.1675.

26. 1-(5-(1,2-diphenylcyclopropyl)-2-methylfuran-3-yl)ethanone (**4**).

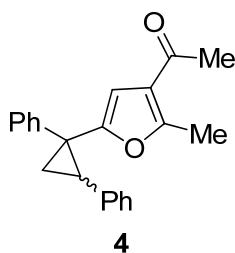

To the solution of **1a** (0.5 mmol, 106 mg) and styrene (5 mmol, 521 mg) in DCM (10 mL),  $AuCl_3$  (0.025 mmol, 7.6 mg) was added. The resulting solution was stirred at rt for 12 h. After removal of solvent under reduced pressure, the residue was purified by column chromatography on silica gel (hexanes :  $Et_2O = 10 : 1$ ) to give the desired product **4** (90 mg) in 56% yield as a yellow oil (fraction 1 / fraction 2 = 1 / 1.2).



First fraction (Rf: 0.67, hexane / EtOAc = 3:1):  $^1\text{H}$  NMR (300 MHz,  $\text{CDCl}_3$ ):  $\delta$  = 7.18 - 7.10 (m, 5 H); 7.06 (d, 3 H,  $J$  = 6.9 Hz); 6.81 (d, 2 H,  $J$  = 7.8 Hz); 5.90 (s, 1 H); 2.94 (t, 1 H,  $J$  = 7.5 Hz); 2.57 (s, 3 H), 2.29 (s, 3 H); 2.01- 1.91 (m, 2 H).  $^{13}\text{C}$  NMR (75.4 MHz,  $\text{CDCl}_3$ ):  $\delta$  = 194.25, 156.82, 156.58, 137.41, 136.82, 131.37, 128.03, 127.73, 127.64, 127.00, 125.79, 122.25, 105.75, 33.51, 31.24, 29.05, 19.00, 14.42 ppm, MS (EI, 70 ev)  $m/z$  (%): 316 ( $\text{M}^+$ , 100). HRMS calcd for  $\text{C}_{22}\text{H}_{20}\text{O}_2$ : 316.1463, found: 316.1462.

Second fraction (Rf: 0.64, hexane / EtOAc = 3:1):  $^1\text{H}$  NMR (300 MHz,  $\text{CDCl}_3$ ):  $\delta$  = 7.32 - 7.22 (m, 4 H); 7.15 (t, 1 H,  $J$  = 7.5 Hz); 7.10 - 7.02 (m, 5 H); 5.94 (s, 1 H); 2.75 (t, 1 H,  $J$  = 7.5 Hz); 2.21 (s, 3 H); 2.12 (s, 3 H); 1.96 (t, 1 H,  $J$  = 6.6 Hz); 1.67 (q, 1 H,  $J$  = 5.4 Hz).  $^{13}\text{C}$  NMR (75.4 MHz,  $\text{CDCl}_3$ ):  $\delta$  = 194.03, 157.25, 152.65, 143.12, 137.44, 128.46, 128.27, 128.00, 127.72, 126.68, 126.24, 121.55, 109.00, 32.26, 31.99, 28.88, 18.92, 14.07 ppm, MS (EI, 70 ev)  $m/z$  (%): 316 ( $\text{M}^+$ , 88.85), 43 (100). HRMS calcd for  $\text{C}_{22}\text{H}_{20}\text{O}_2$ : 316.1463, found: 316.1464.

27. 3-oxo-1-phenylprop-1-en-2-yl pivalate (**6**).

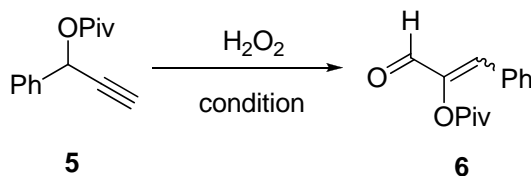

**Typical Procedure for synthesis of 6 and 6'**: To a solution of **5**<sup>2</sup> (0.5 mmol, 108 mg) and catalyst (0.025 mmol) in DCM (5 mL),  $\text{H}_2\text{O}_2$  (30%, 1.5 mmol, 170 mg) was added. The resulting solution was stirred at rt until the reaction was completed (monitored by TLC). After removal of solvent under reduced pressure, the residue was purified by column chromatography on silica gel (hexanes : AcOEt = 10 : 1) to give the desired product **6** as colorless oil.<sup>3</sup>

(*Z*)-isomer (Rf: 0.22, hexane / EtOAc = 10:1):  $^1\text{H}$  NMR (300 MHz,  $\text{CDCl}_3$ )  $\delta$  = 9.40 (s, 1 H), 7.66 - 7.64 (m, 2 H), 7.43-7.41 (m, 3 H), 7.01 (s, 1 H), 1.41 (s, 9 H);  $^{13}\text{C}$  NMR (75.4 MHz,  $\text{CDCl}_3$ )  $\delta$  = 185.46, 175.26, 146.38, 136.39, 131.73, 130.68, 130.30, 128.79, 39.06, 27.10 ppm.

(*E*)-isomer (Rf: 0.36, hexane / EtOAc = 10:1):  $^1\text{H}$  NMR (300 MHz,  $\text{CDCl}_3$ )  $\delta$  =

9.69 (s, 1 H), 7.45-7.39 (m, 6 H), 1.36 (s, 9 H);  $^{13}\text{C}$  NMR (75.4 MHz,  $\text{CDCl}_3$ )  $\delta$  = 183.96, 176.52, 146.54, 136.57, 131.12, 129.96, 129.74, 128.77, 38.95, 27.15 ppm.

**Reference:**

1. For synthesis of 3-phenylpropionaldehyde, see: D. W. Knight, H. C. Rost, C. M. Sharland and J. Singkhonrat, *Tetrahedron Lett.*, 2007, **48**, 7906–7910.
2. For synthesis of **5**, see: A. K. Chakraborti, L. Sharma and R. Gulhane, *Tetrahedron*, 2003, **59**, 7661.
3. For the judgement of Z/E isomer of **6**, see: C. A. Witham, P. Mauleon, N. D. Shapiro, B. D. Sherry and F. D. Toste, *J. Am. Chem. Soc.*, 2007, **129**, 5838.

7.490  
7.464  
7.441  
7.437  
7.420  
7.391  
7.367  
7.345  
7.260  
6.942

2.568  
2.368

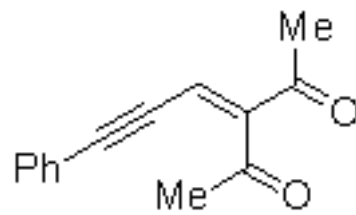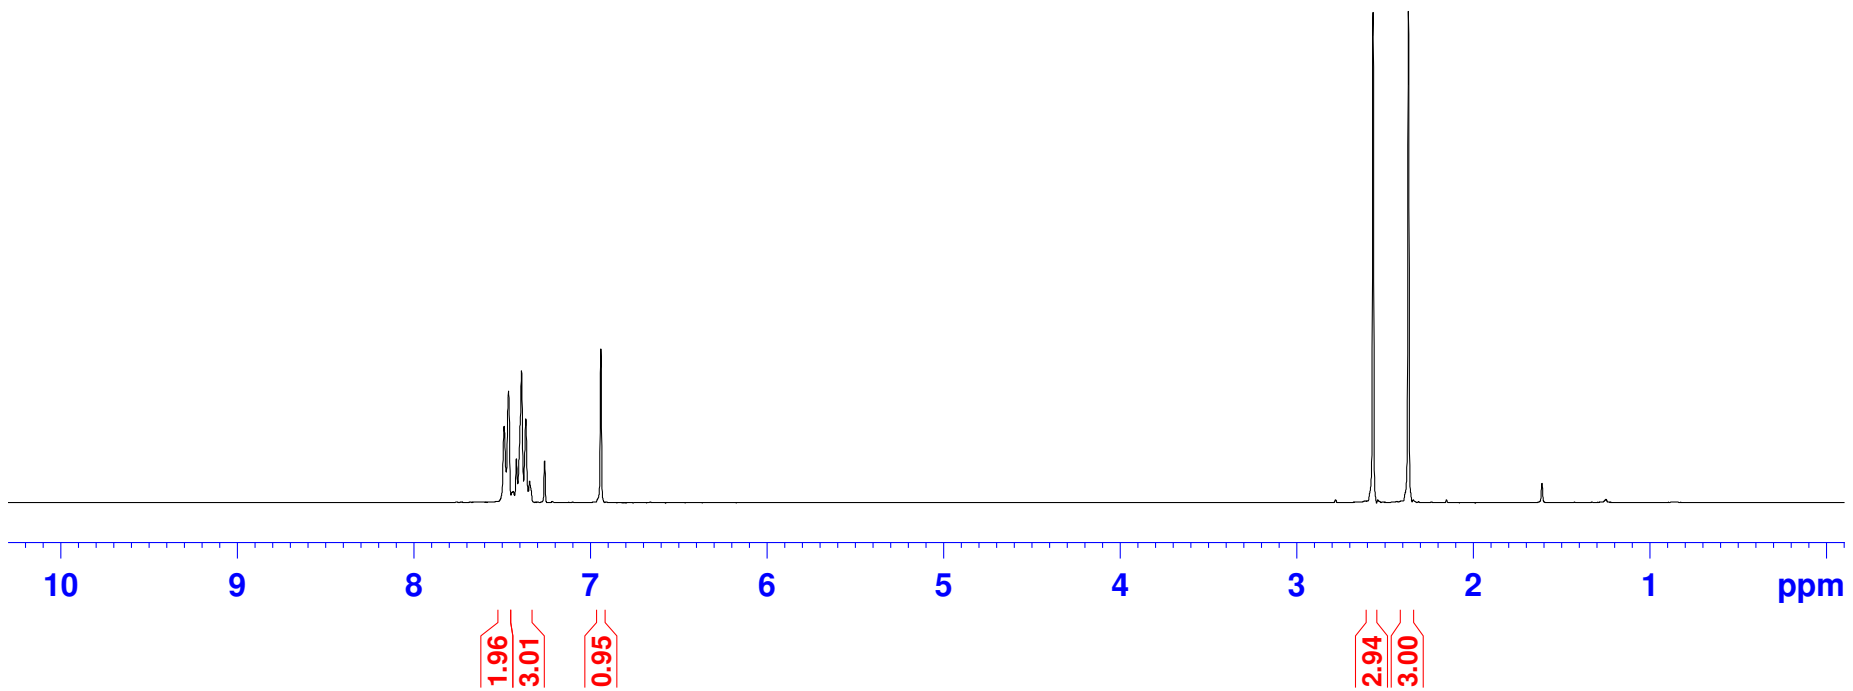

— 200.84  
— 195.54

— 149.38

132.09  
130.13  
128.64  
122.25  
121.55

— 107.03

— 85.26  
77.43  
77.00  
76.58

— 31.02  
— 27.42

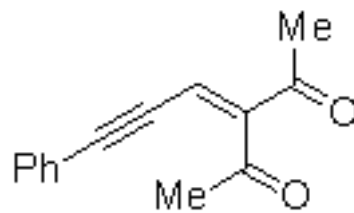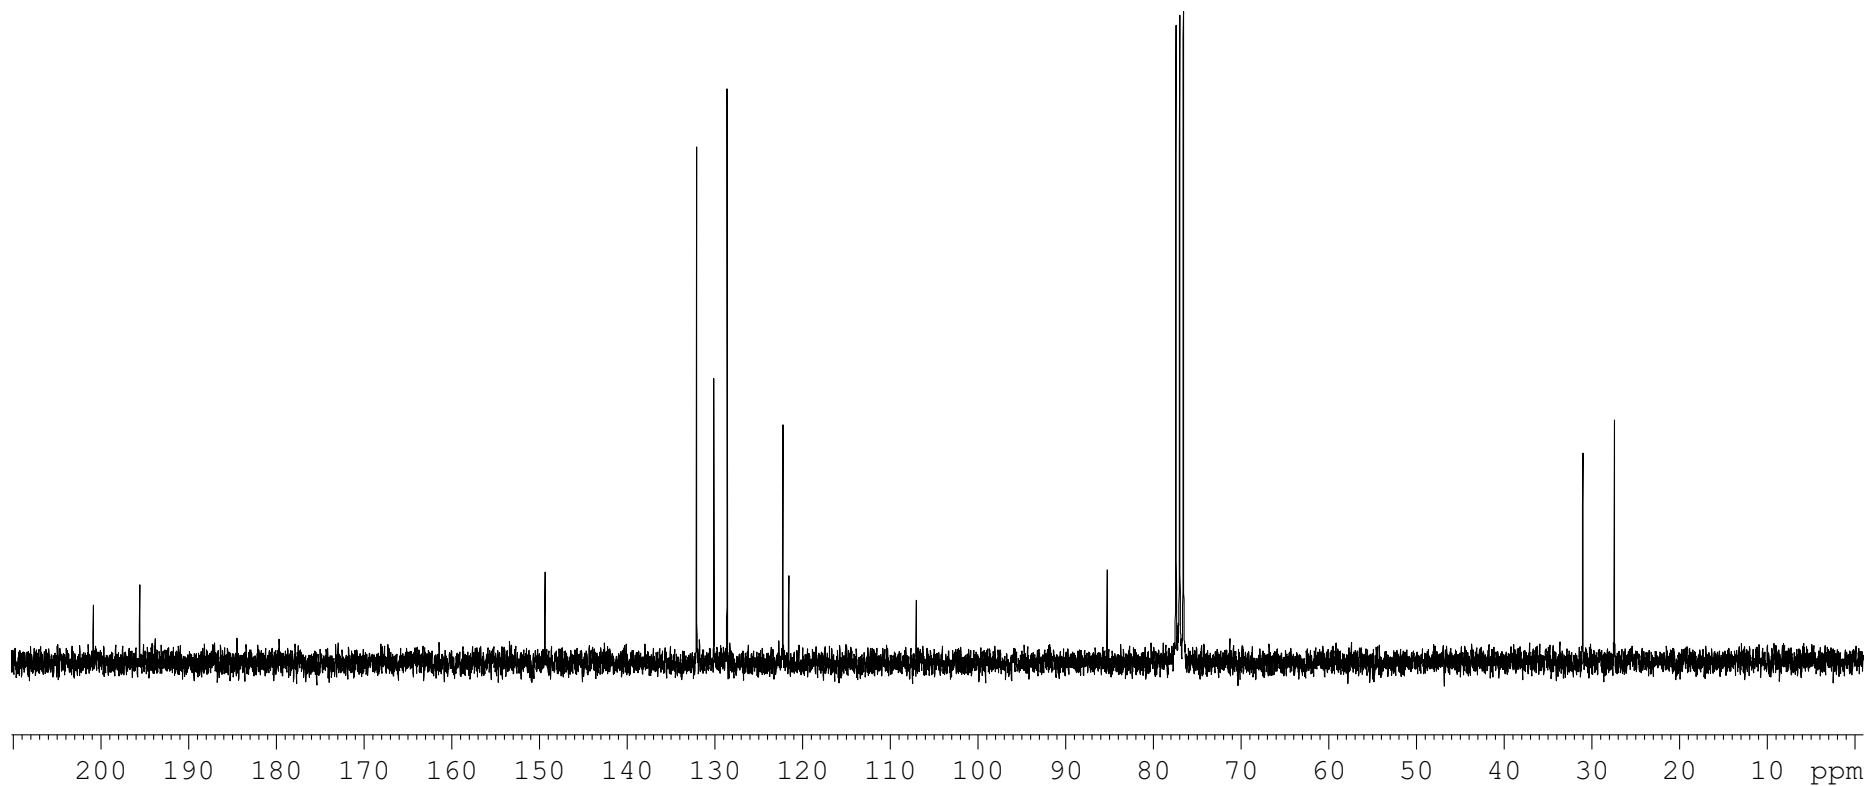

7.437  
7.409  
7.260  
6.959  
6.897  
6.869

3.834

2.564  
2.358

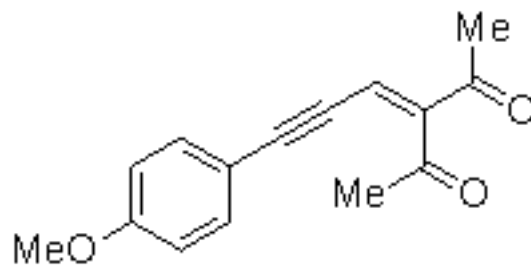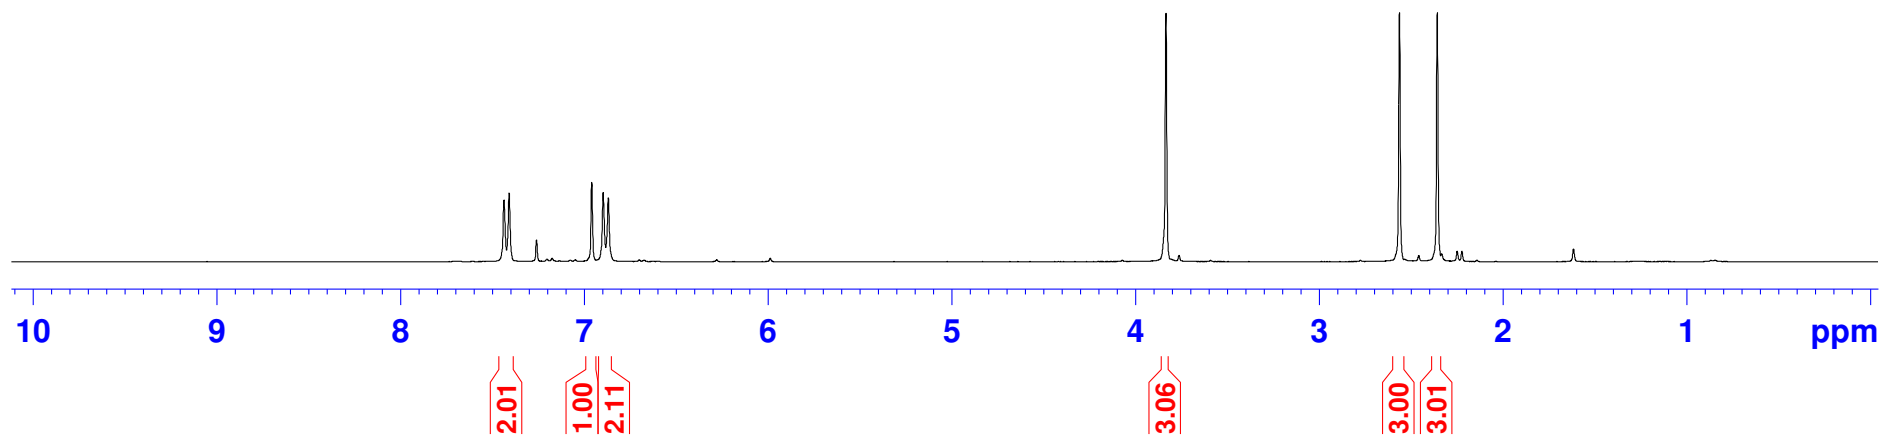

— 201.21  
— 195.67

— 161.20

— 148.21

— 133.98

— 123.10

— 114.33  
— 113.61

— 85.09

— 77.42  
— 77.00  
— 76.58

— 55.40

— 31.07  
— 27.48

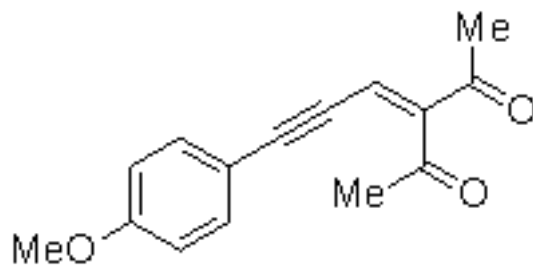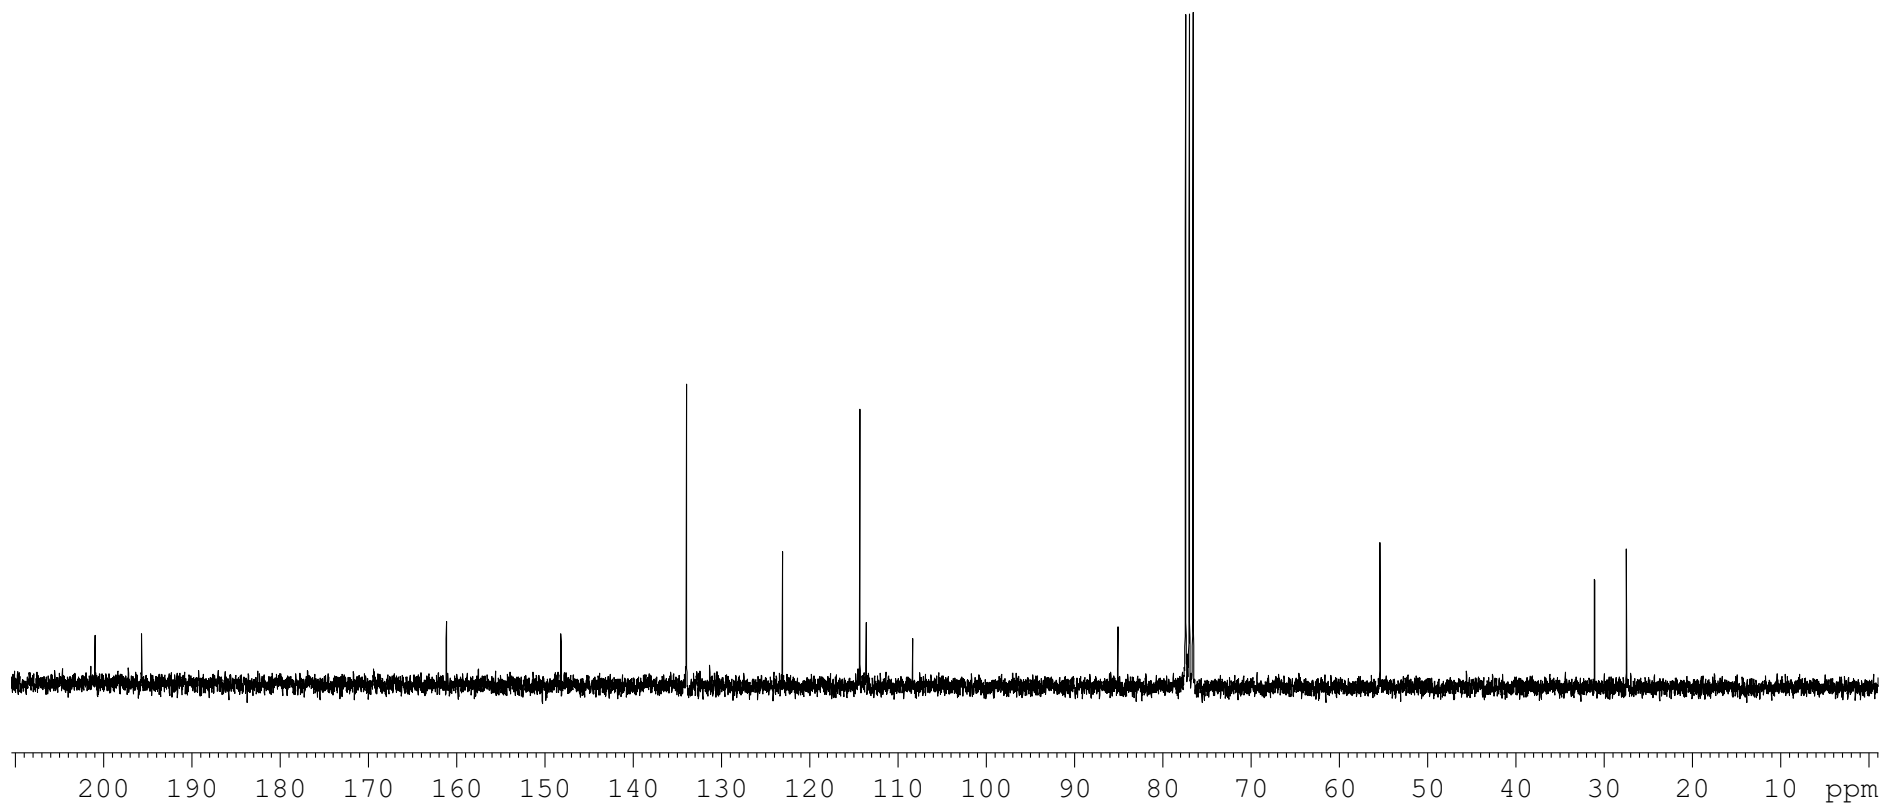

7.380  
7.355  
7.260  
7.185  
7.159  
6.946

2.564  
2.375  
2.359

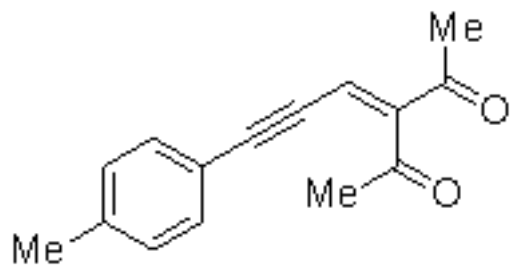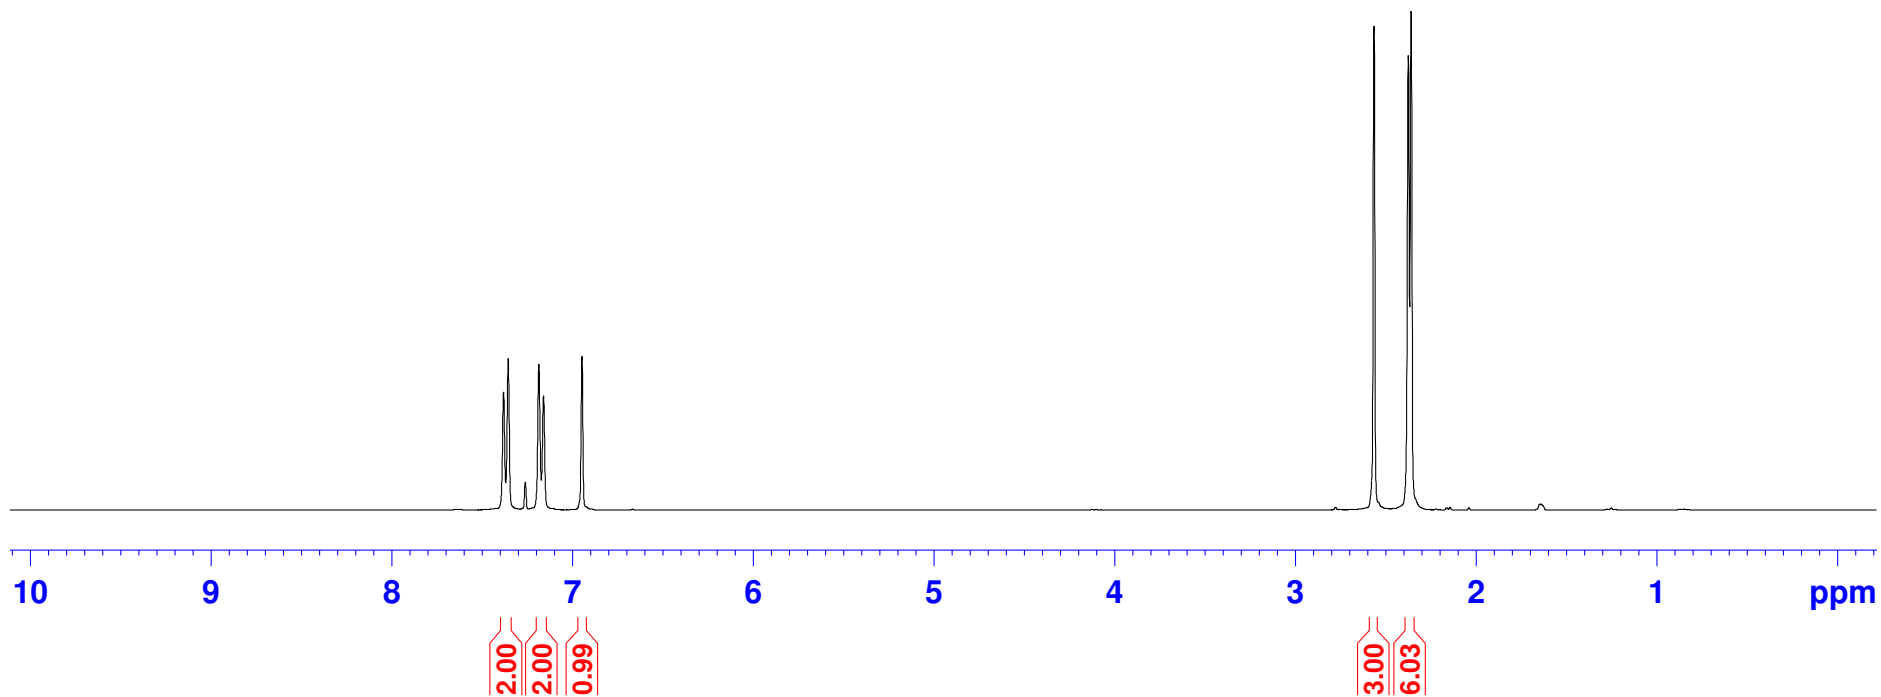

— 200.94  
— 195.62

— 148.83  
— 140.79

— 132.07  
— 129.31  
— 122.66  
— 118.51  
— 107.87

— 85.07  
— 77.43  
— 77.00  
— 76.58

— 31.05  
— 27.45  
— 21.67

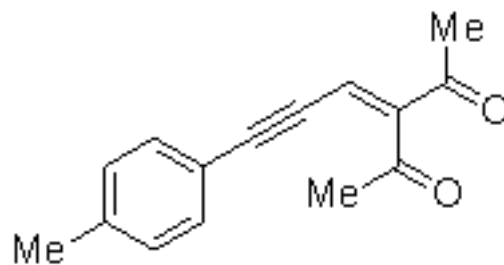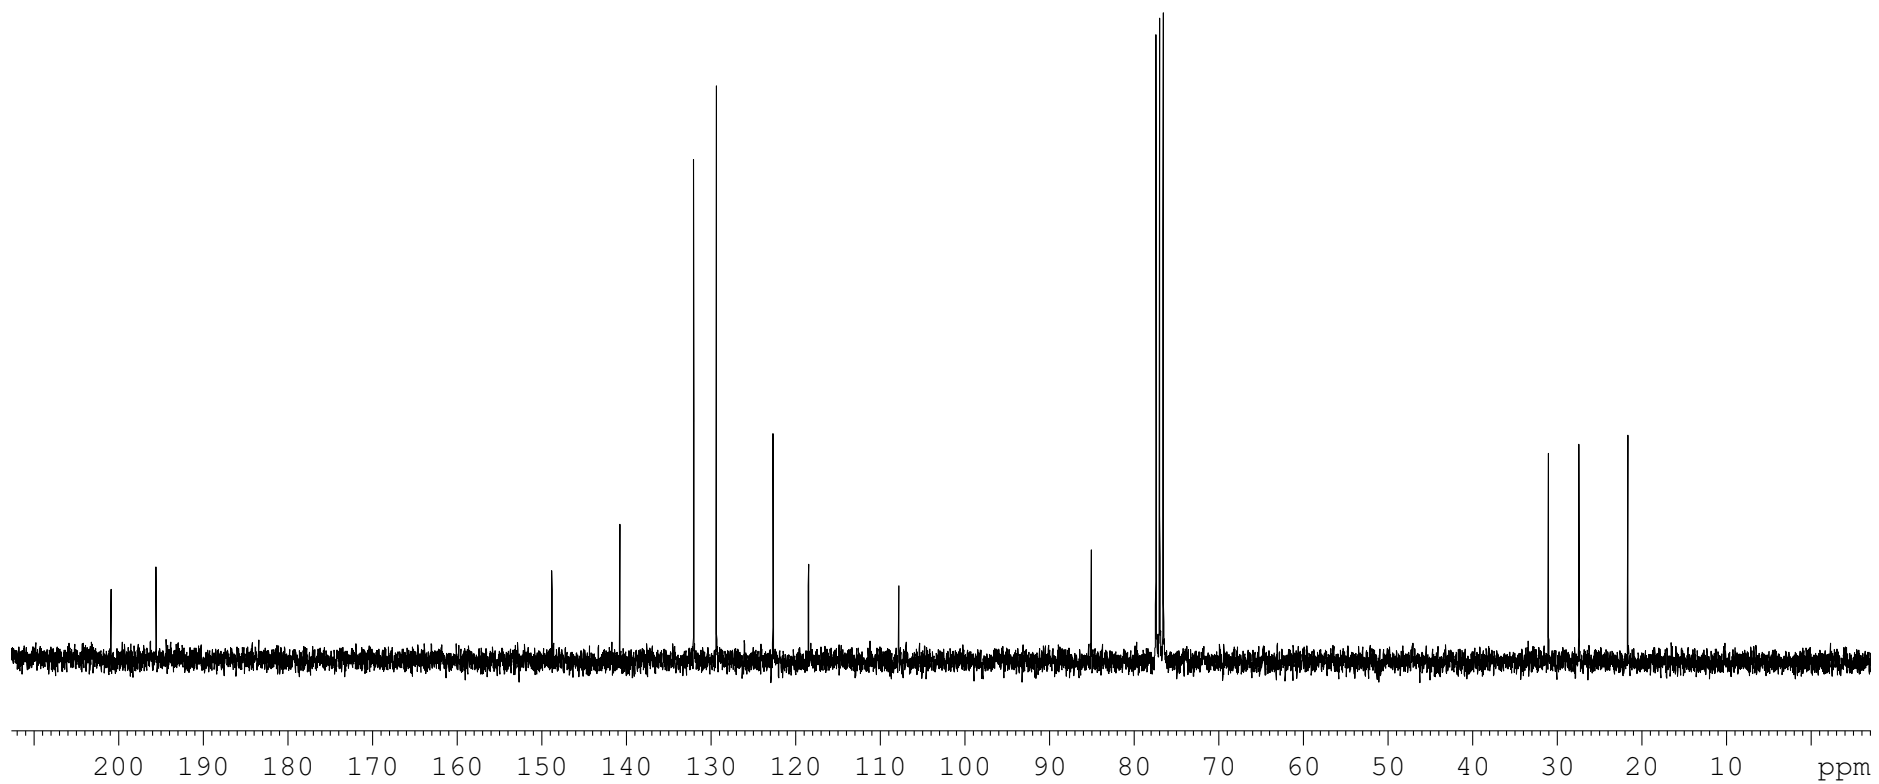



8.247  
8.220  
7.641  
7.613  
7.260  
6.881

2.537  
2.389

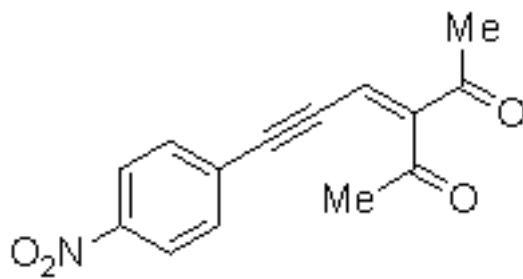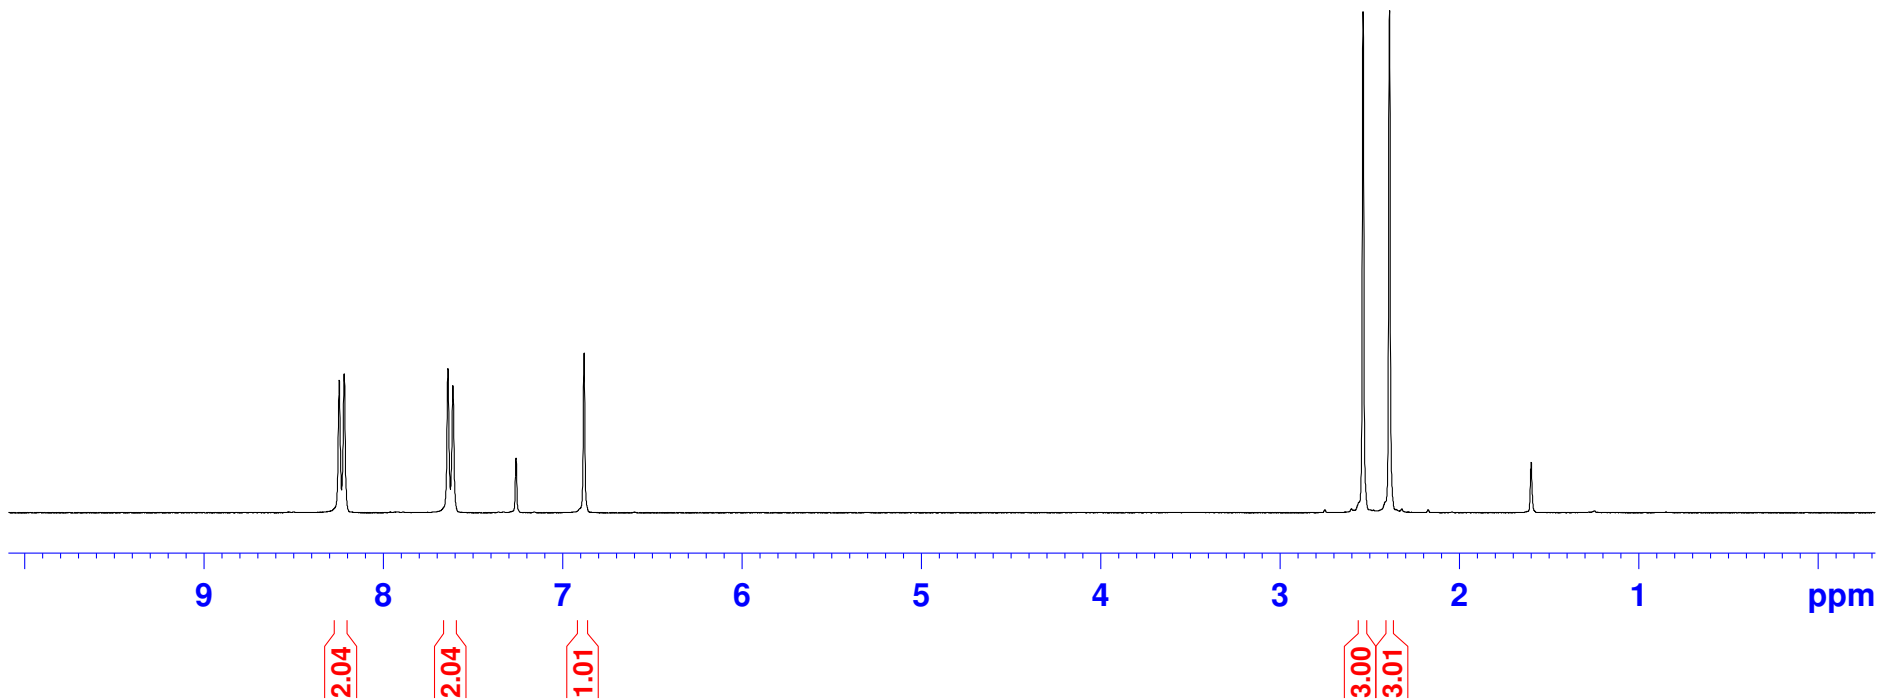

— 200.41  
— 195.25

— 151.05  
— 148.00

— 132.82  
— 128.00  
— 123.76  
— 120.41

— 102.86

— 88.84

— 77.43  
— 77.00  
— 76.58

— 30.97  
— 27.29

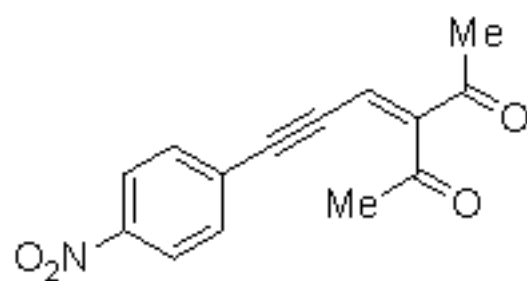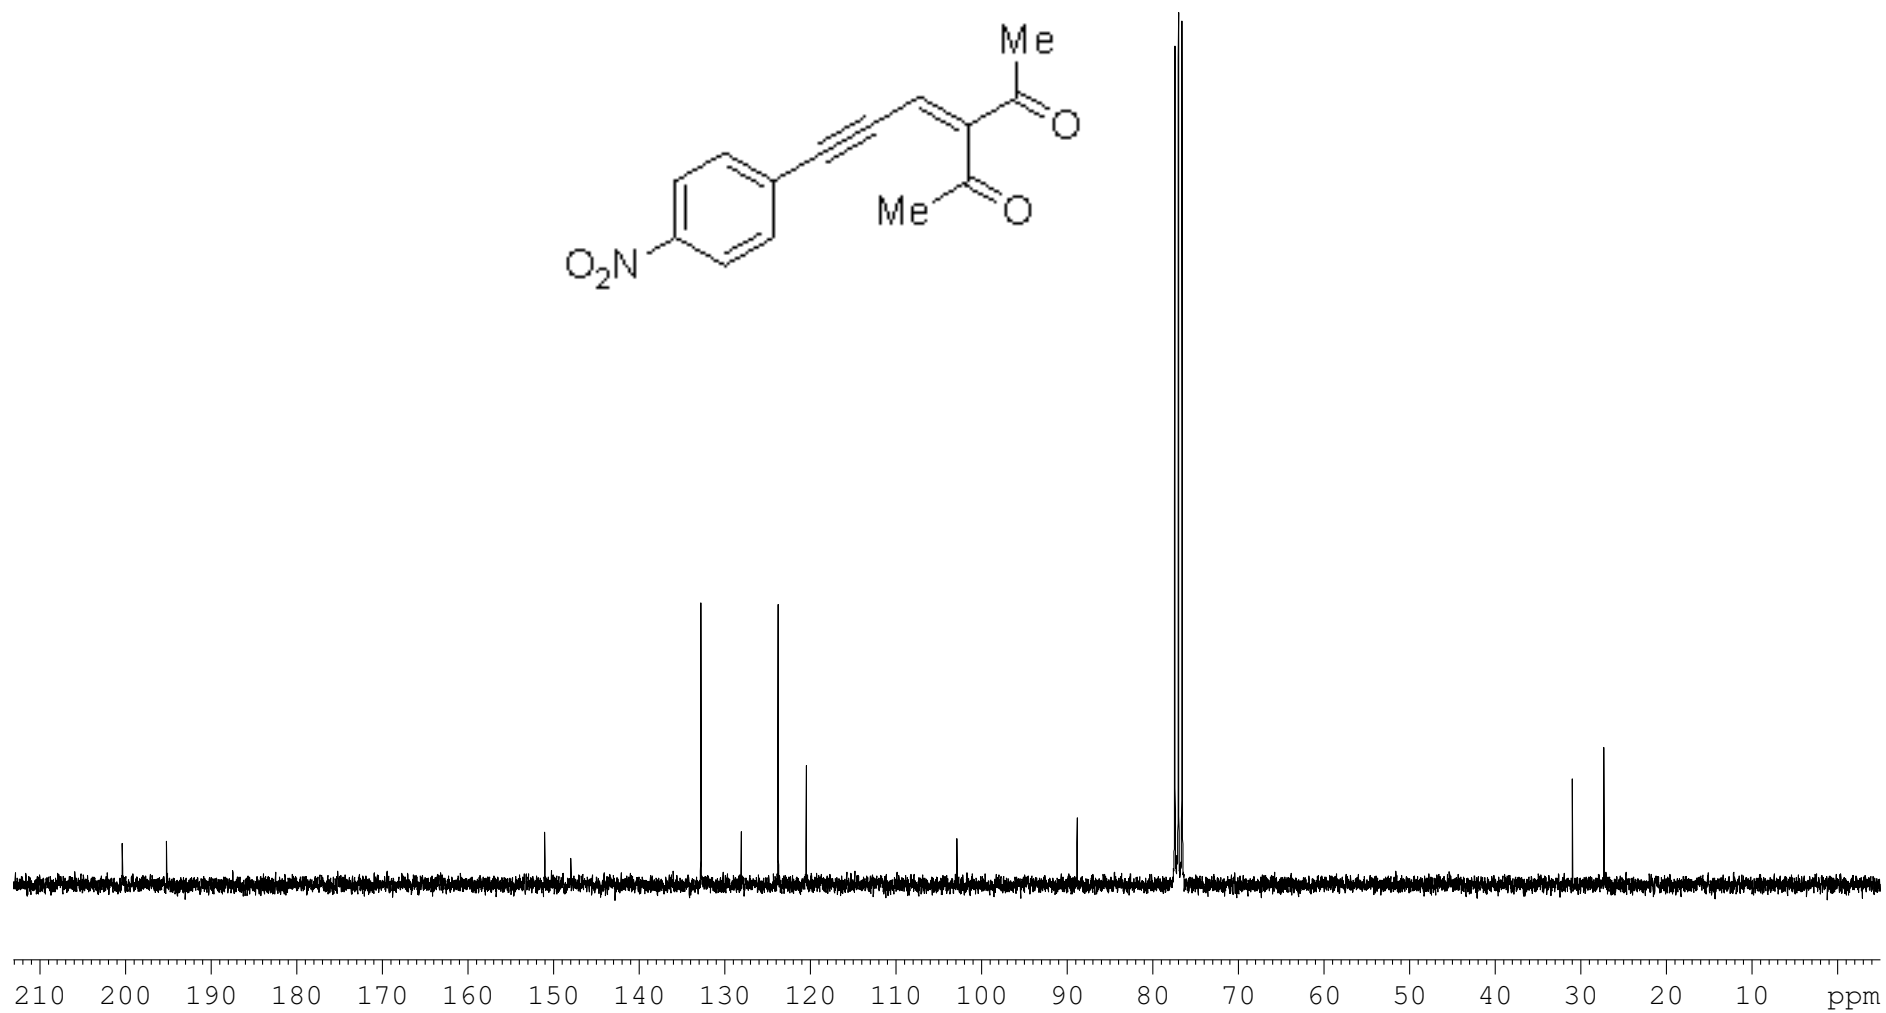

8.264  
8.236  
7.924  
7.897  
7.879  
7.852  
7.736  
7.712  
7.658  
7.633  
7.607  
7.573  
7.548  
7.524  
7.480  
7.455  
7.429  
7.260  
7.058

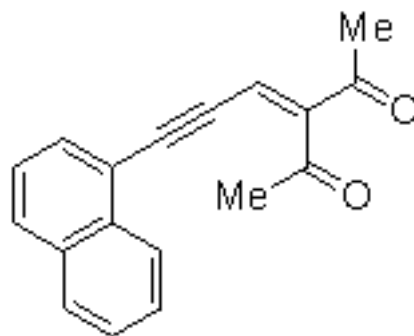

2.603  
2.406

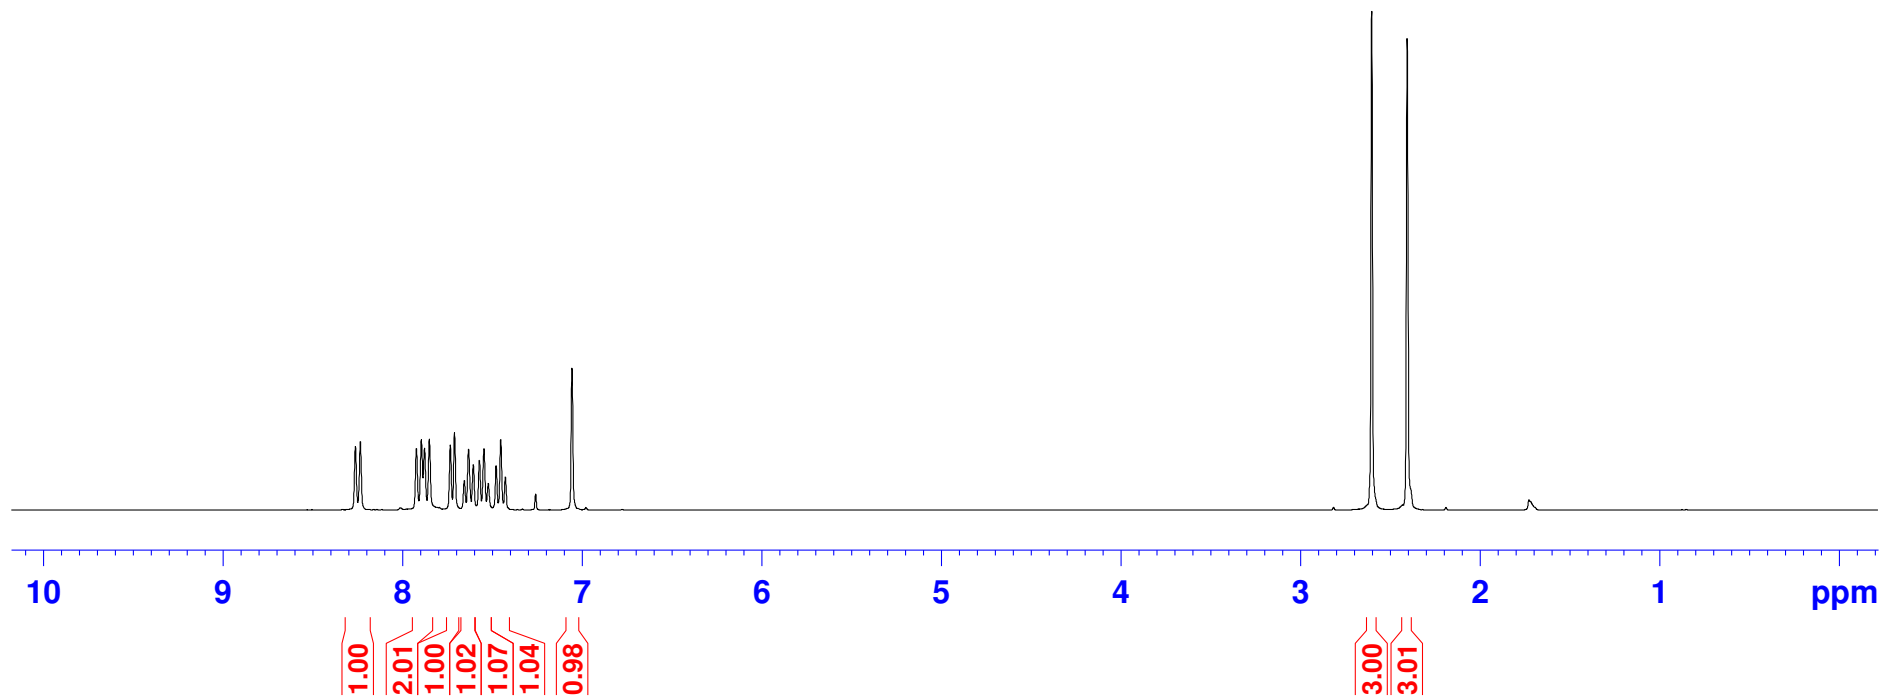

— 201.00  
— 195.62

— 149.21  
— 133.09  
— 133.03  
— 131.95  
— 130.86  
— 128.42  
— 127.52  
— 126.88  
— 125.6  
— 125.16  
— 122.32  
— 119.1  
— 105.4  
  
— 89.78  
  
— 77.42  
— 77.00  
— 76.58

— 31.08  
— 27.18

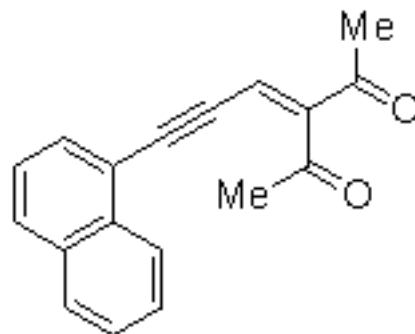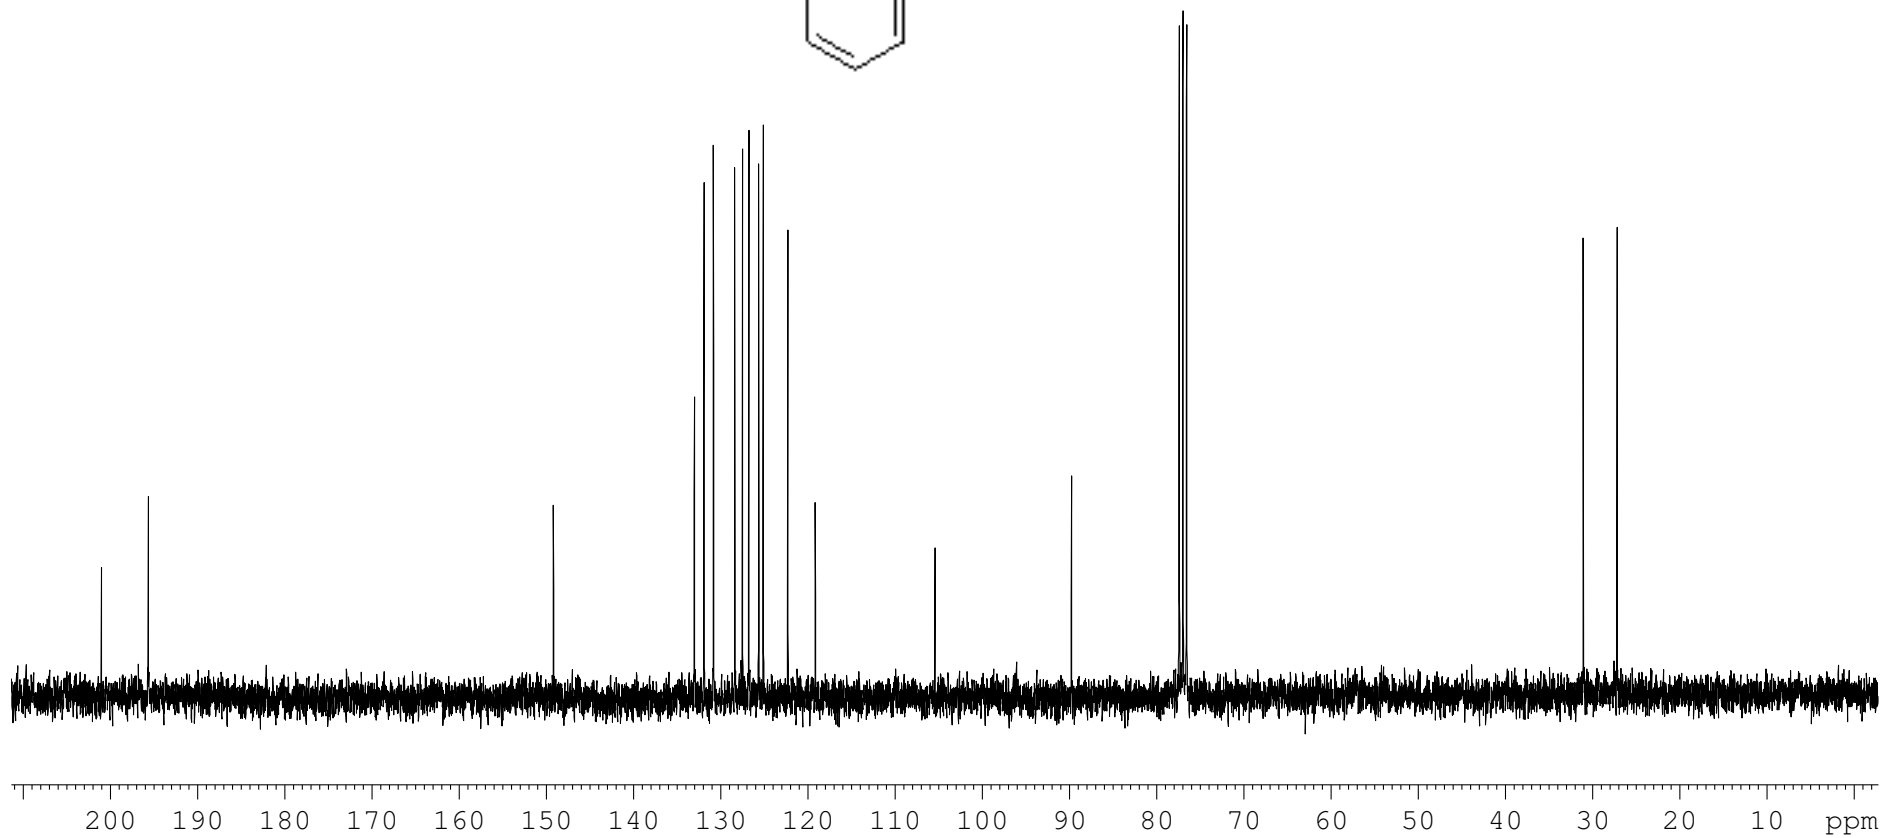

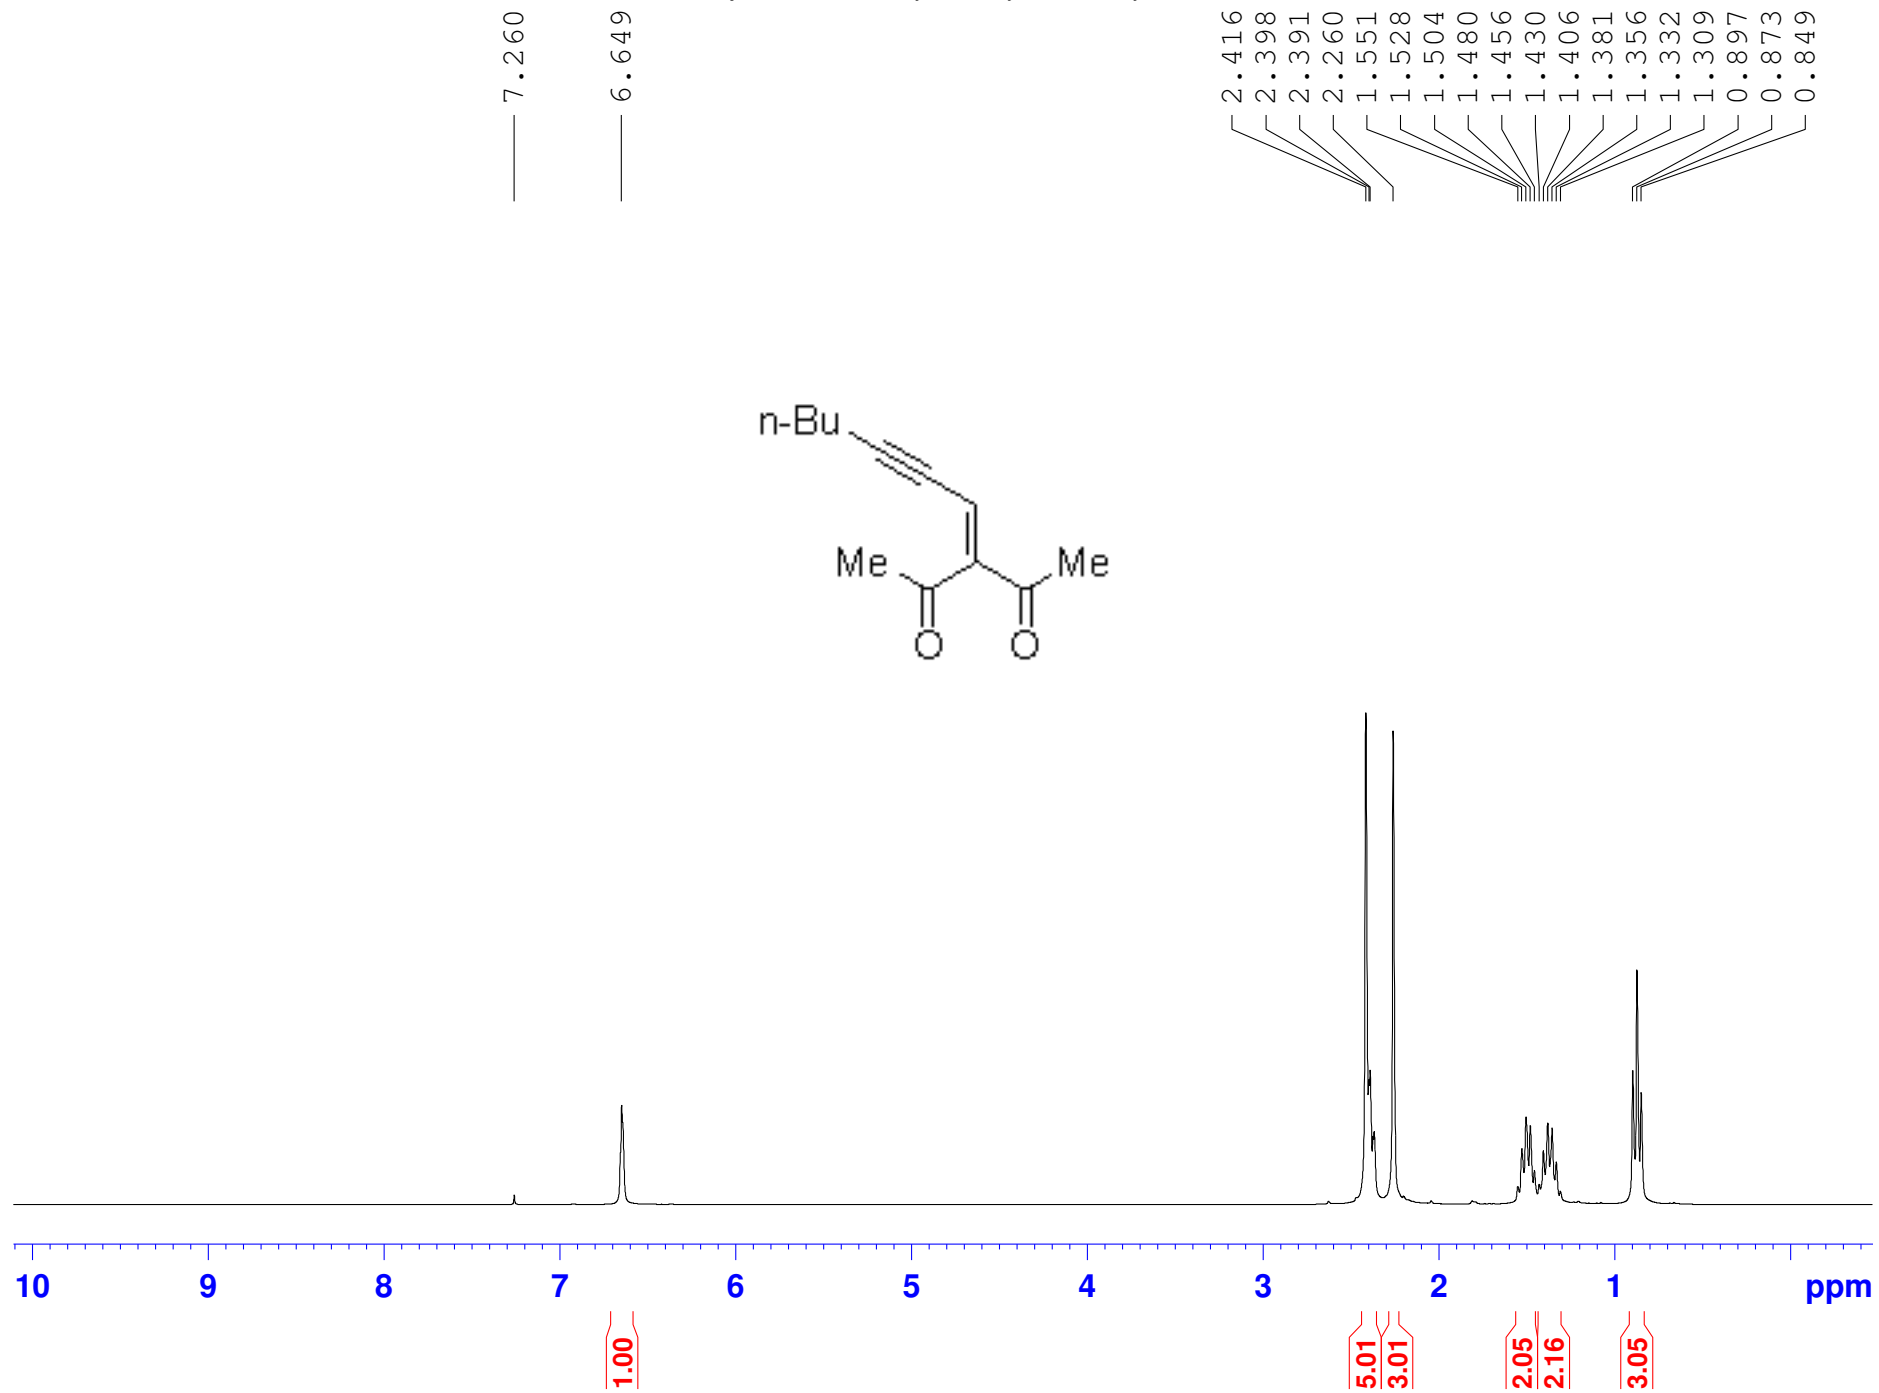

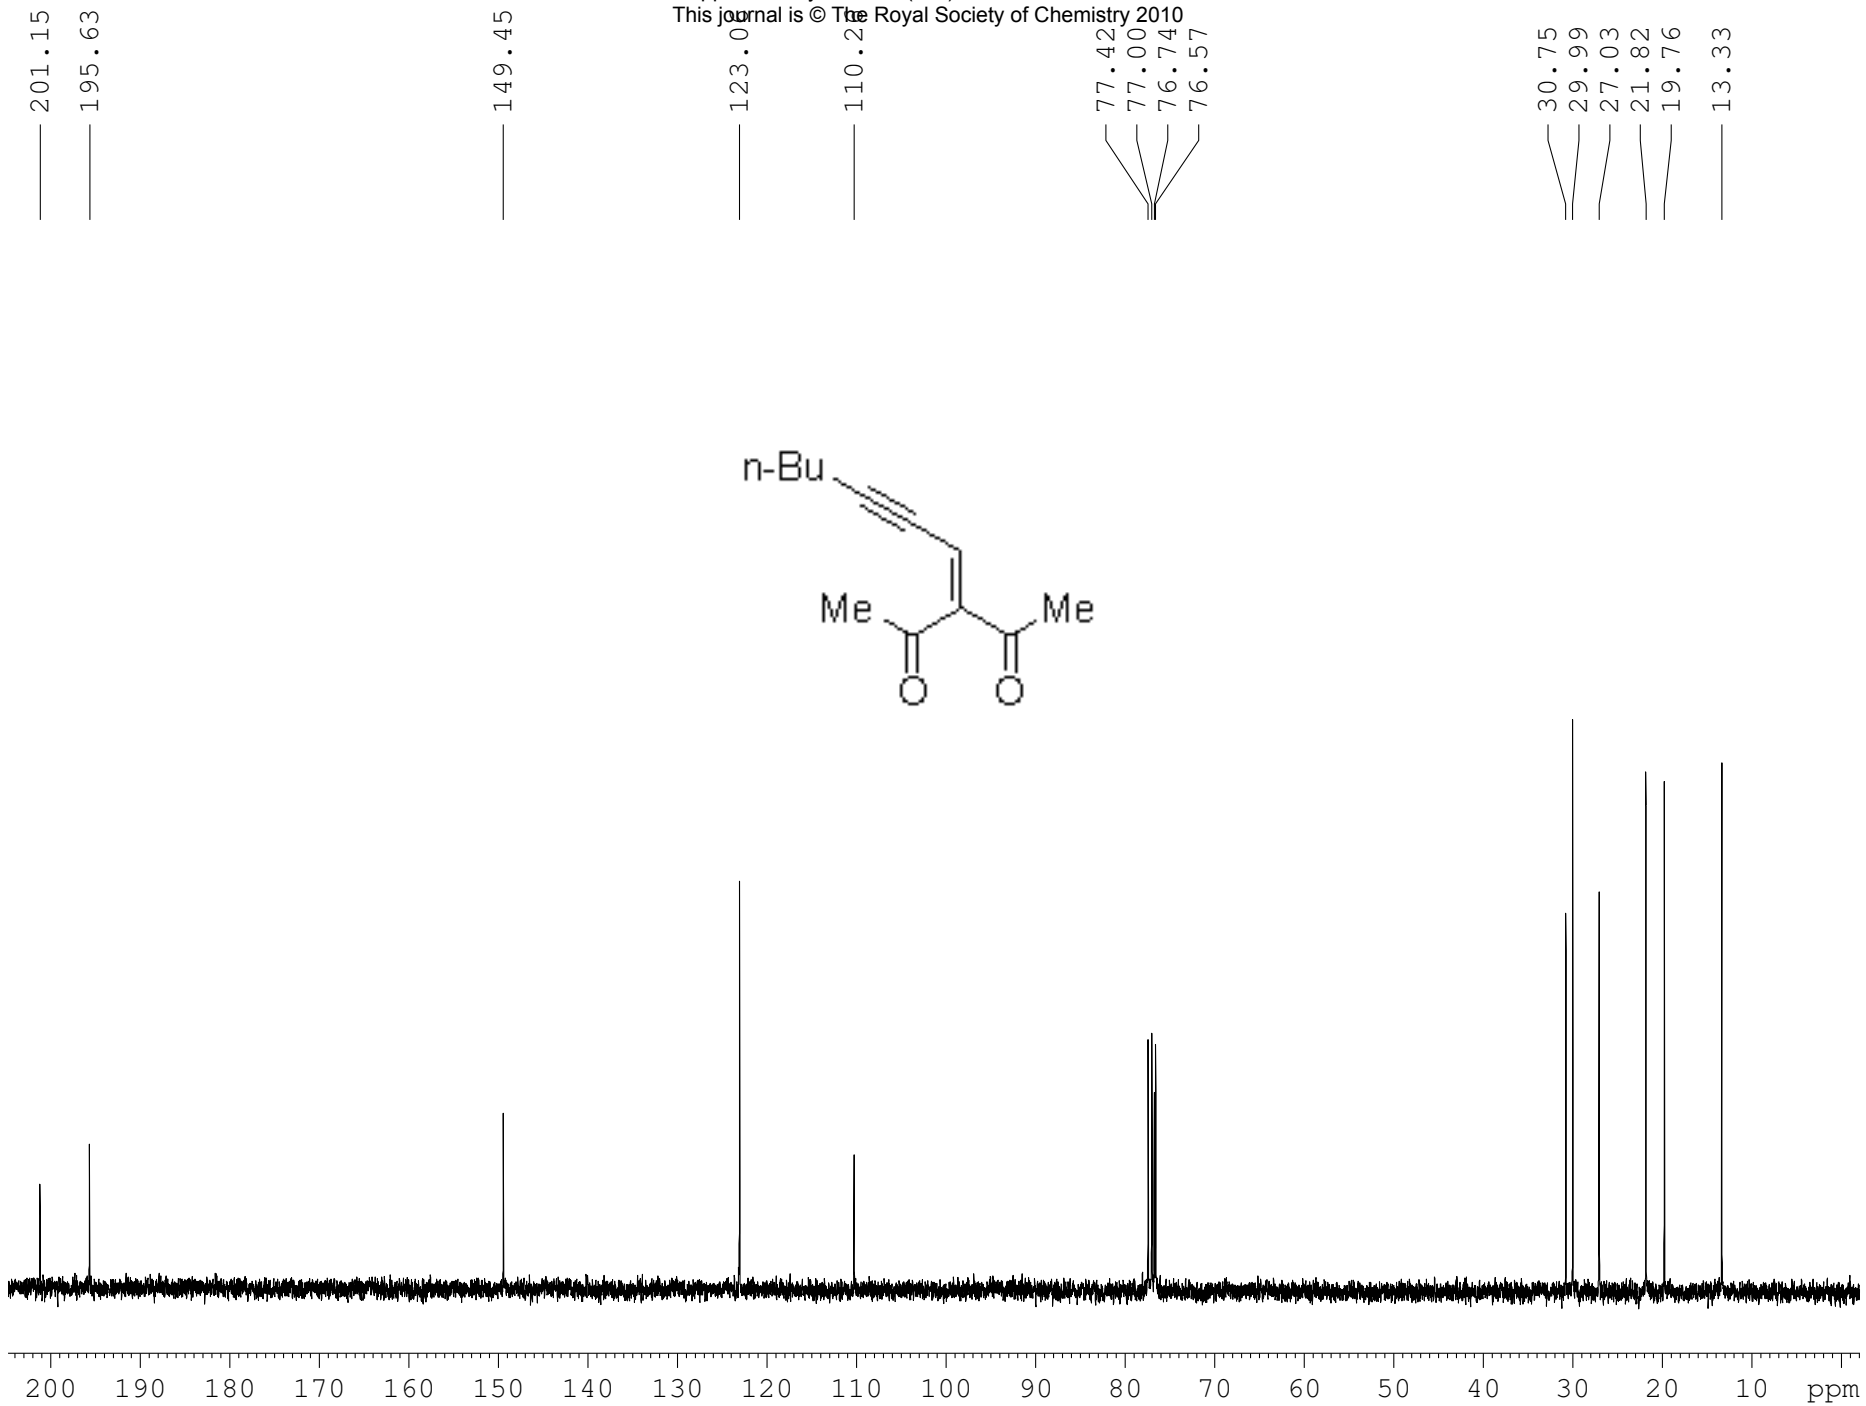

7.451  
7.431  
7.425  
7.398  
7.373  
7.348  
7.328  
7.320  
7.260  
6.882

2.905  
2.881  
2.857  
2.832  
2.702  
2.678  
2.654  
2.630

1.220  
1.196  
1.172  
1.140  
1.116  
1.092

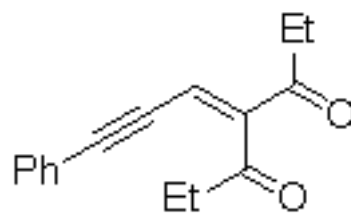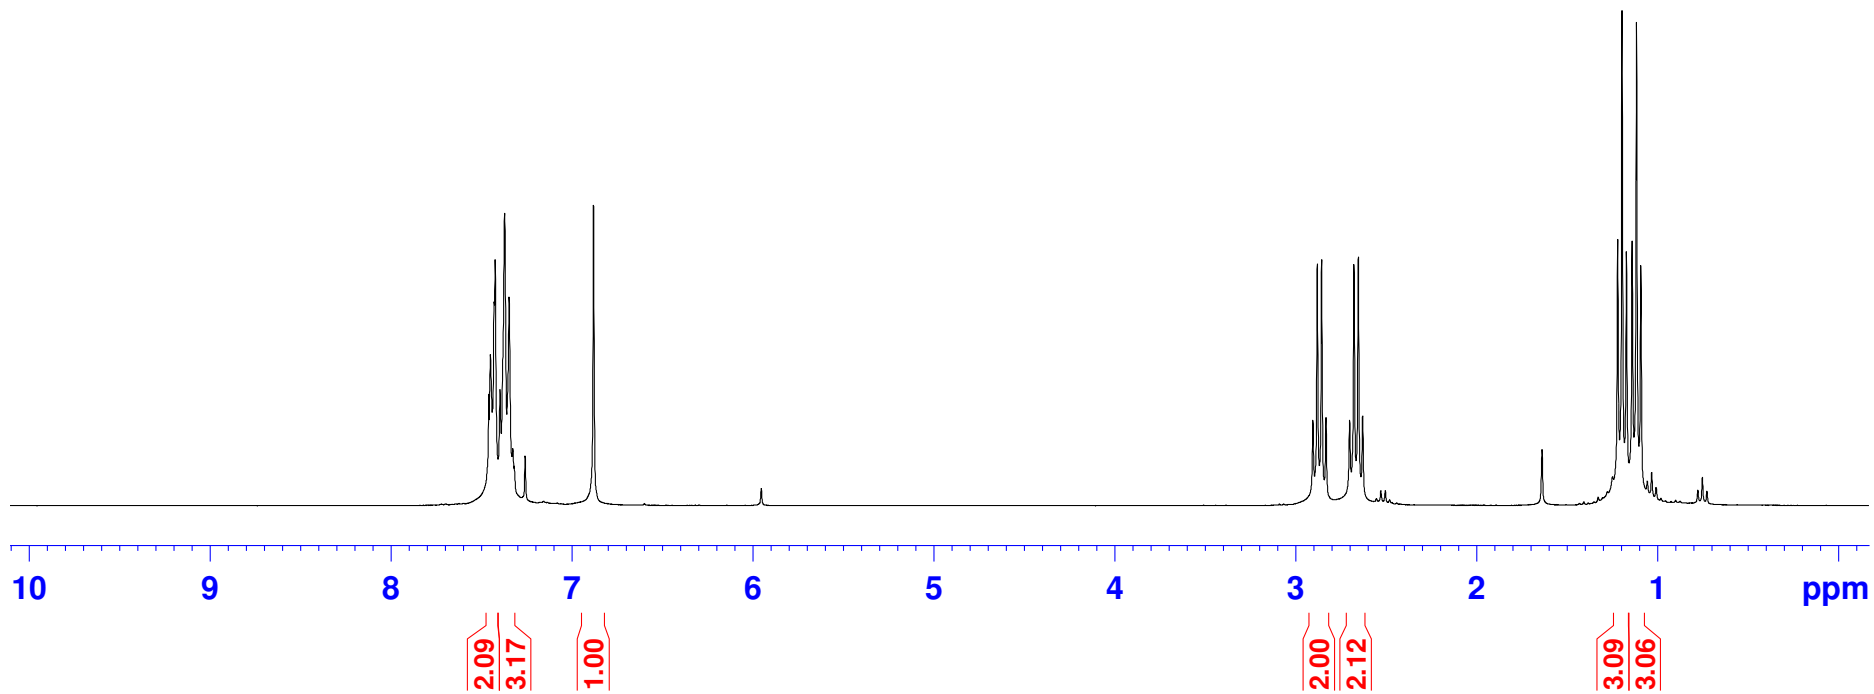

204.77  
198.10

149.82

132.01  
129.92  
128.57  
121.68  
120.24

105.4

85.05  
77.42  
77.00  
76.58

36.75  
32.67

7.89  
7.61

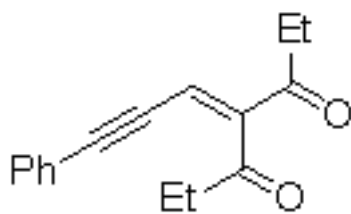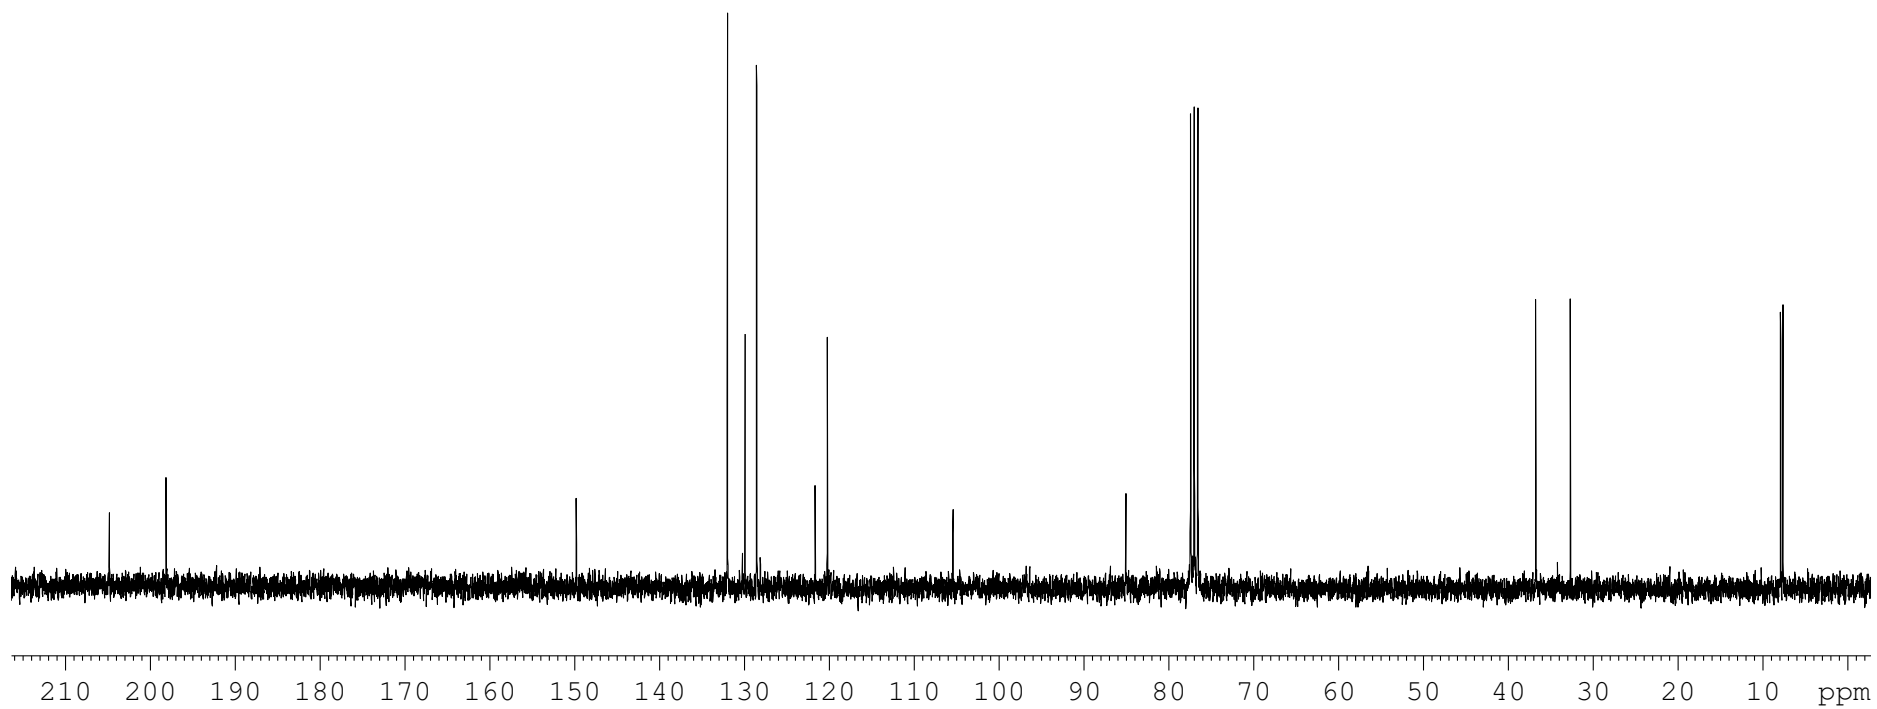



8.053  
8.027  
7.850  
7.824  
7.628  
7.604  
7.582  
7.564  
7.529  
7.503  
7.478  
7.454  
7.428  
7.337  
7.313  
7.289  
7.260  
7.235  
7.209  
7.098  
7.072  
6.991

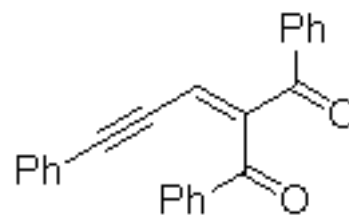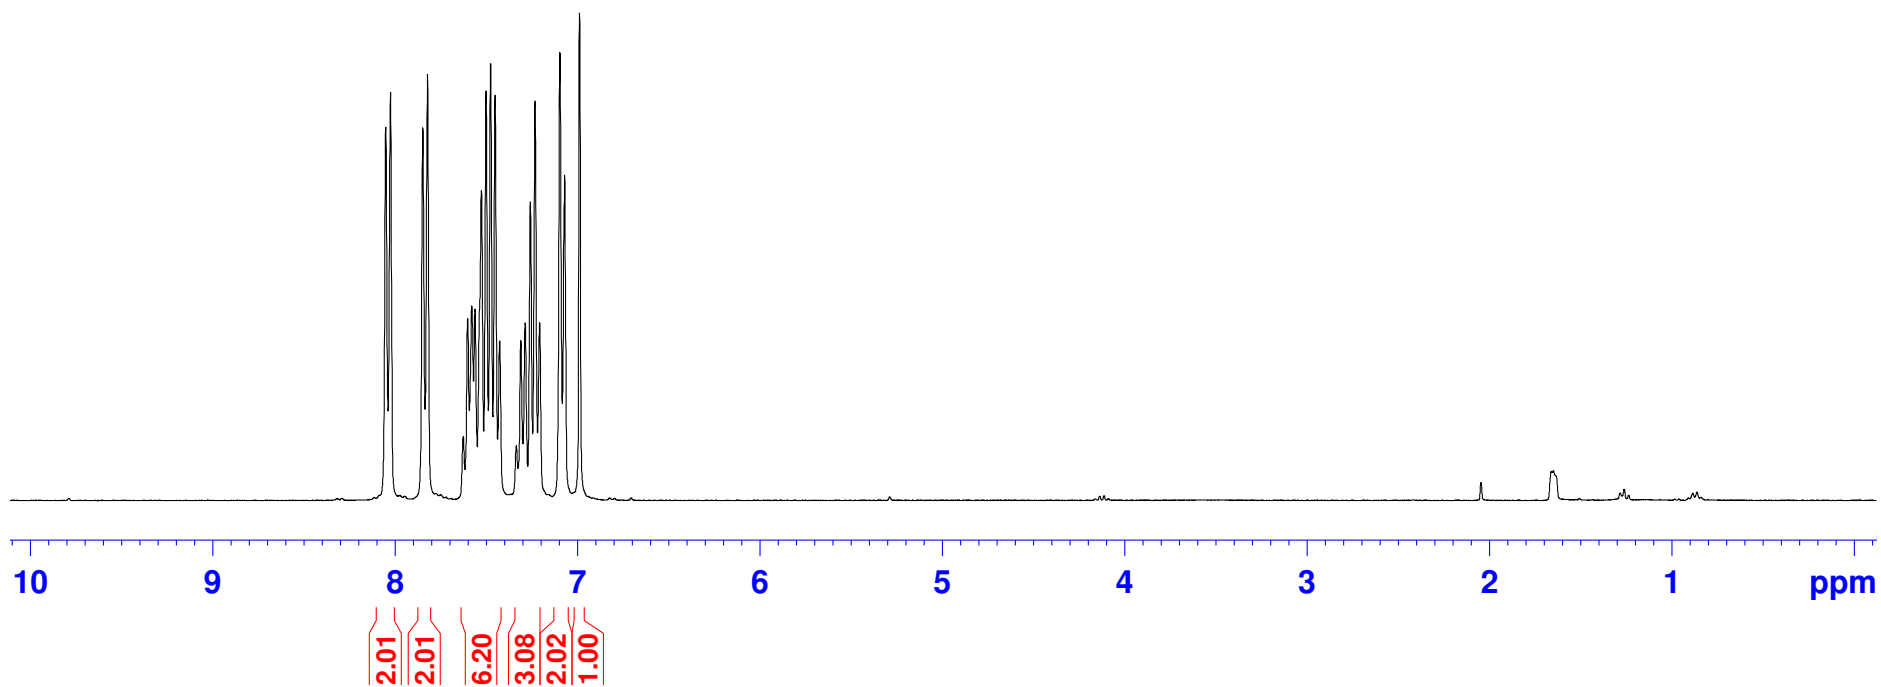

194.06  
192.84

147.73  
136.73  
136.32  
133.71  
132.91  
131.94  
129.71  
129.60  
129.23  
128.71  
128.54  
128.26  
124.32  
121.51  
106.46

85.29  
77.42  
77.00  
76.58

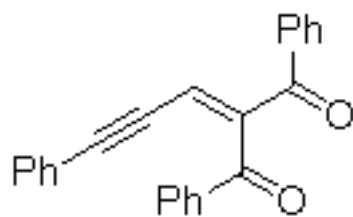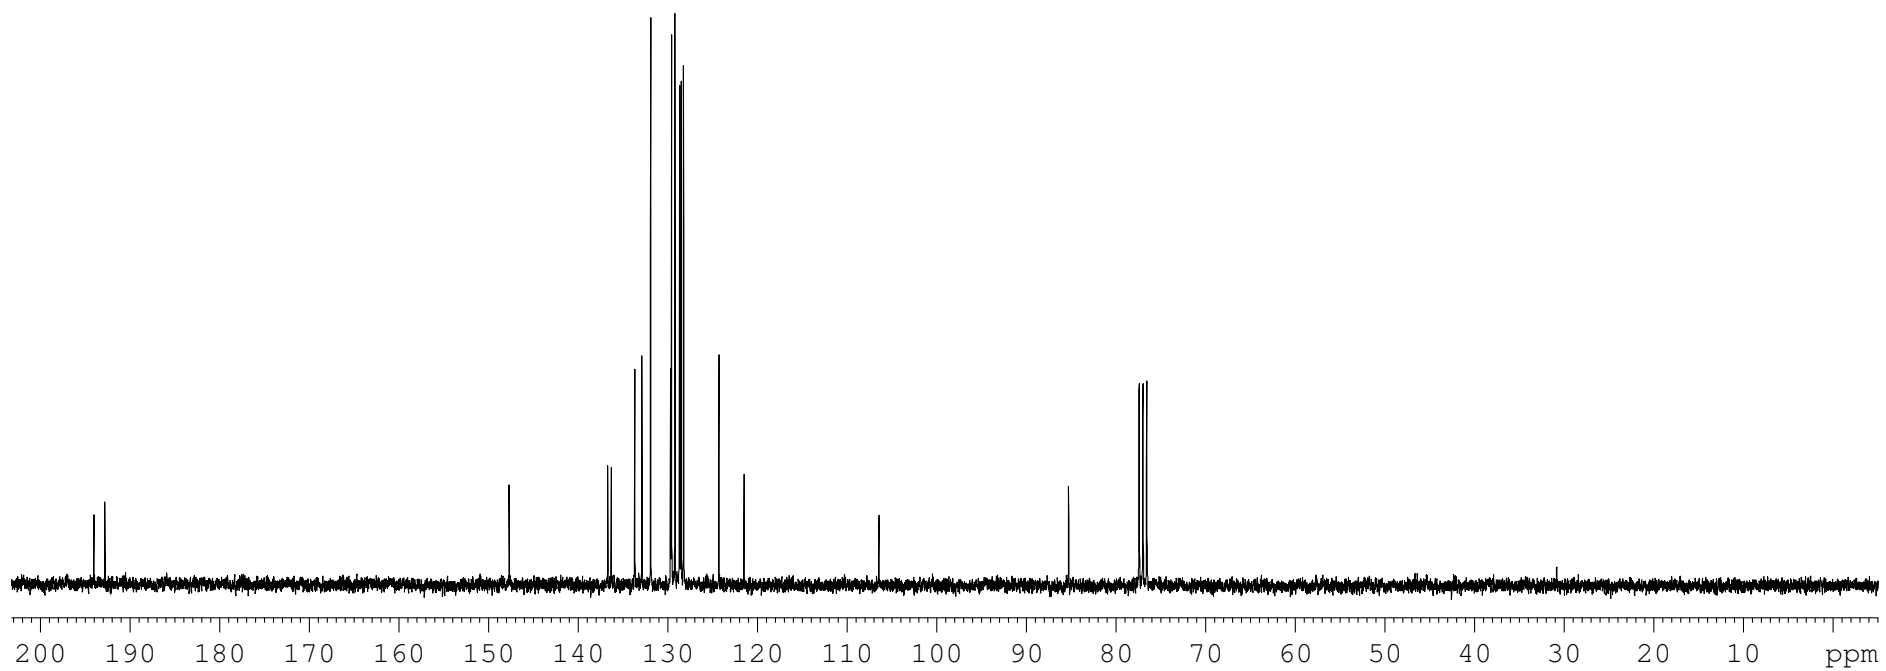

7.983  
7.959  
7.956  
7.615  
7.593  
7.570  
7.567  
7.508  
7.482  
7.456  
7.282  
7.260  
7.237  
7.233  
7.199  
7.173  
7.146  
7.137  
7.000  
6.976  
6.972

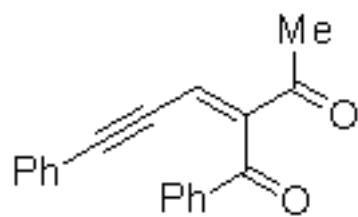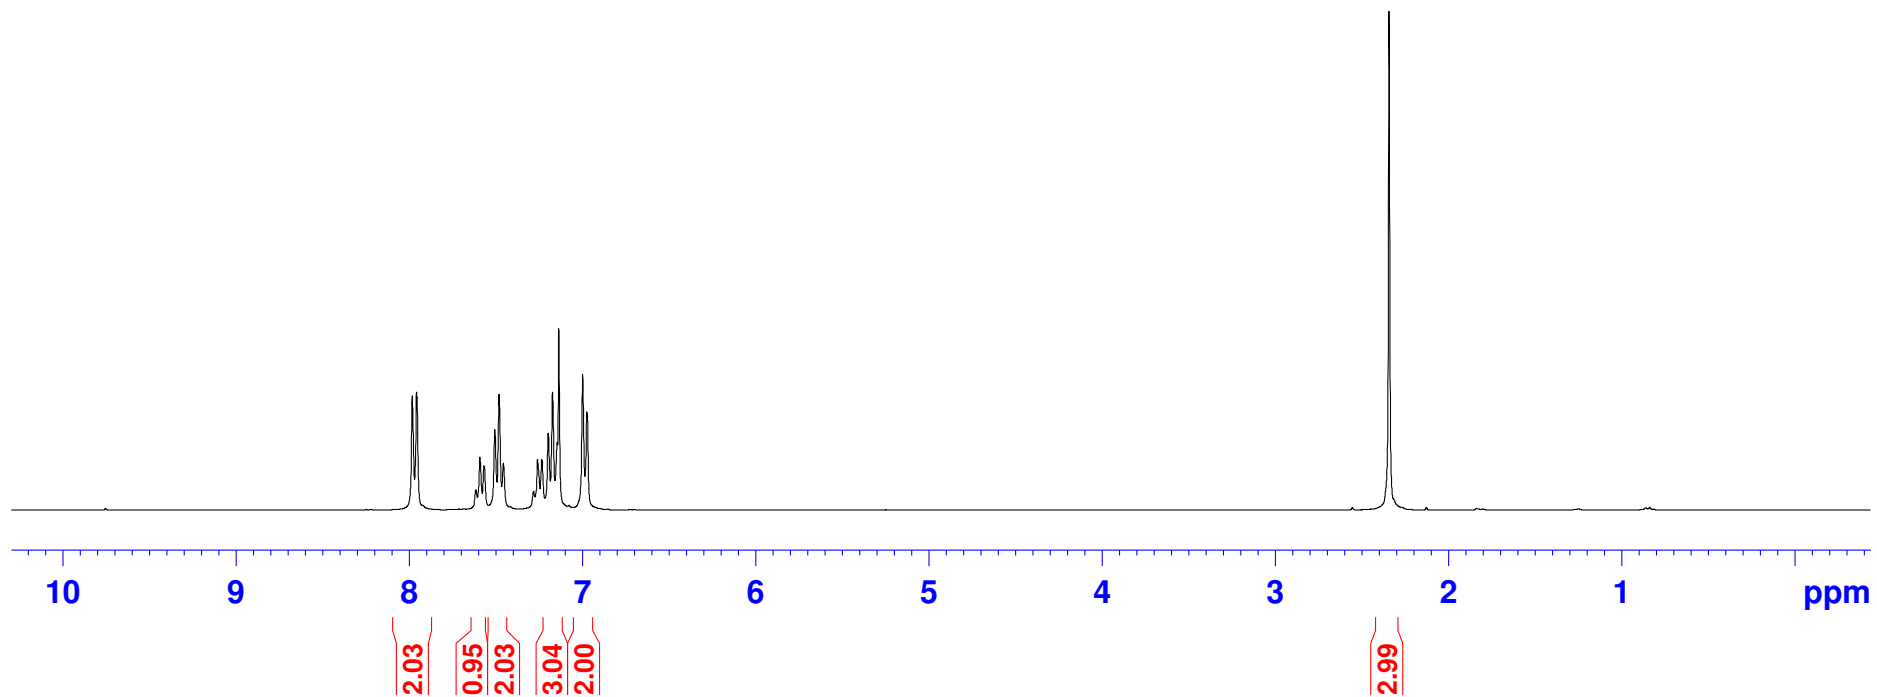

195.08  
194.11

147.72  
136.02  
133.91  
131.83  
129.68  
129.39  
128.71  
128.11  
122.21  
121.31  
106.31

85.33  
77.42  
77.00  
76.58

27.36

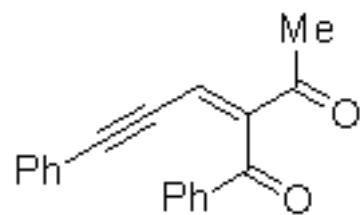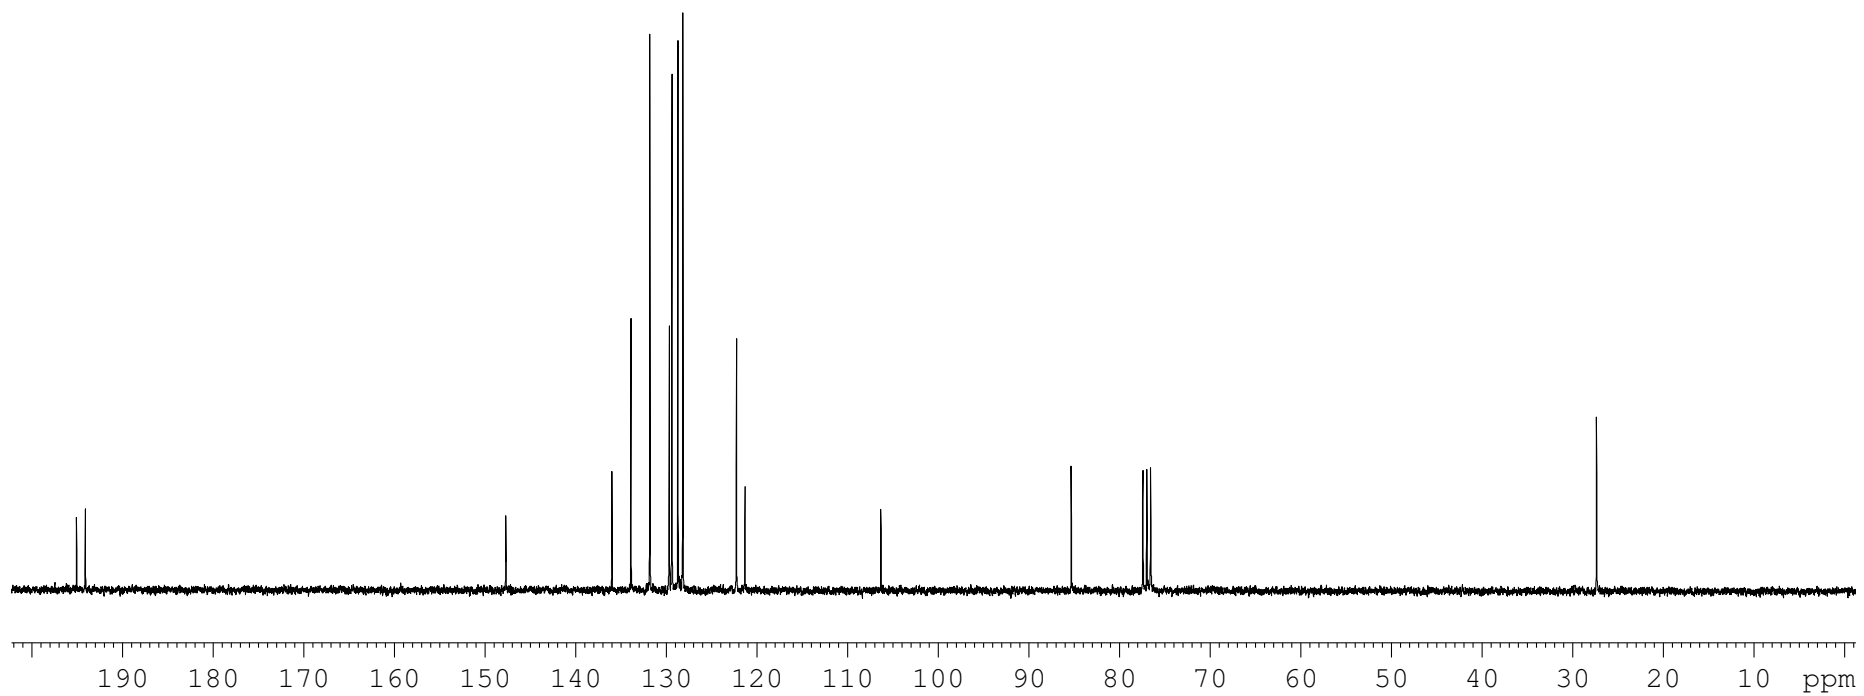

7.808  
7.784  
7.616  
7.592  
7.567  
7.536  
7.516  
7.509  
7.502  
7.476  
7.451  
7.422  
7.400  
7.375  
7.355  
7.260  
6.675

2.604

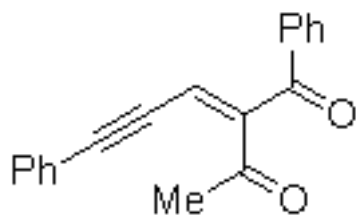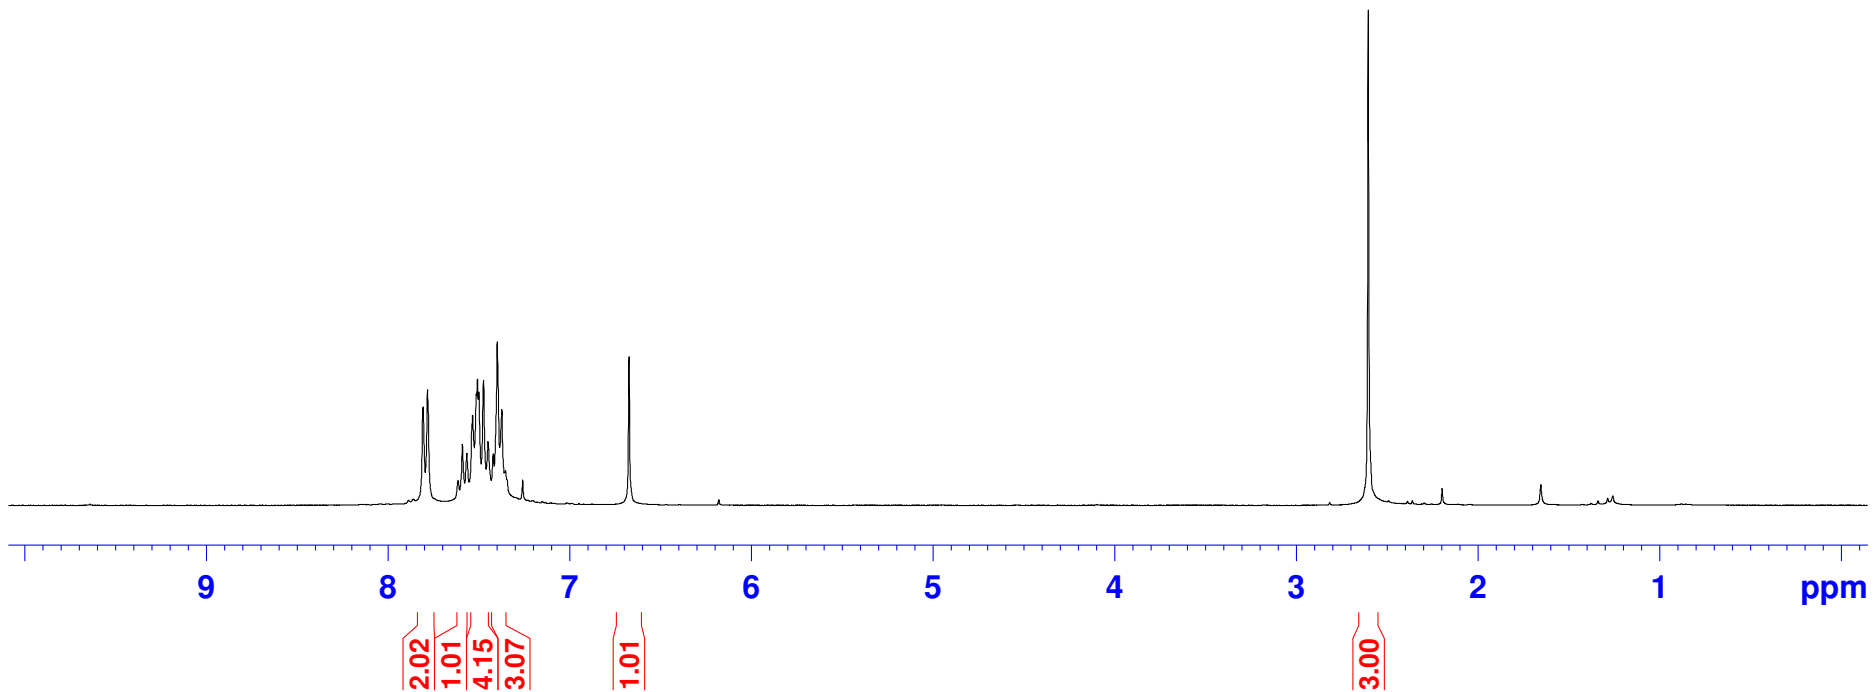

198.12  
194.20

148.46  
136.71  
133.28  
132.12  
130.04  
129.34  
128.6  
128.5  
123.1  
121.7

106.5

85.68  
77.42  
77.00  
76.58

30.64

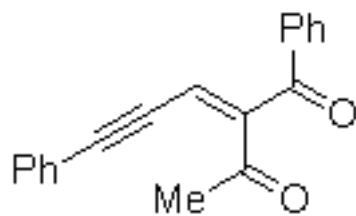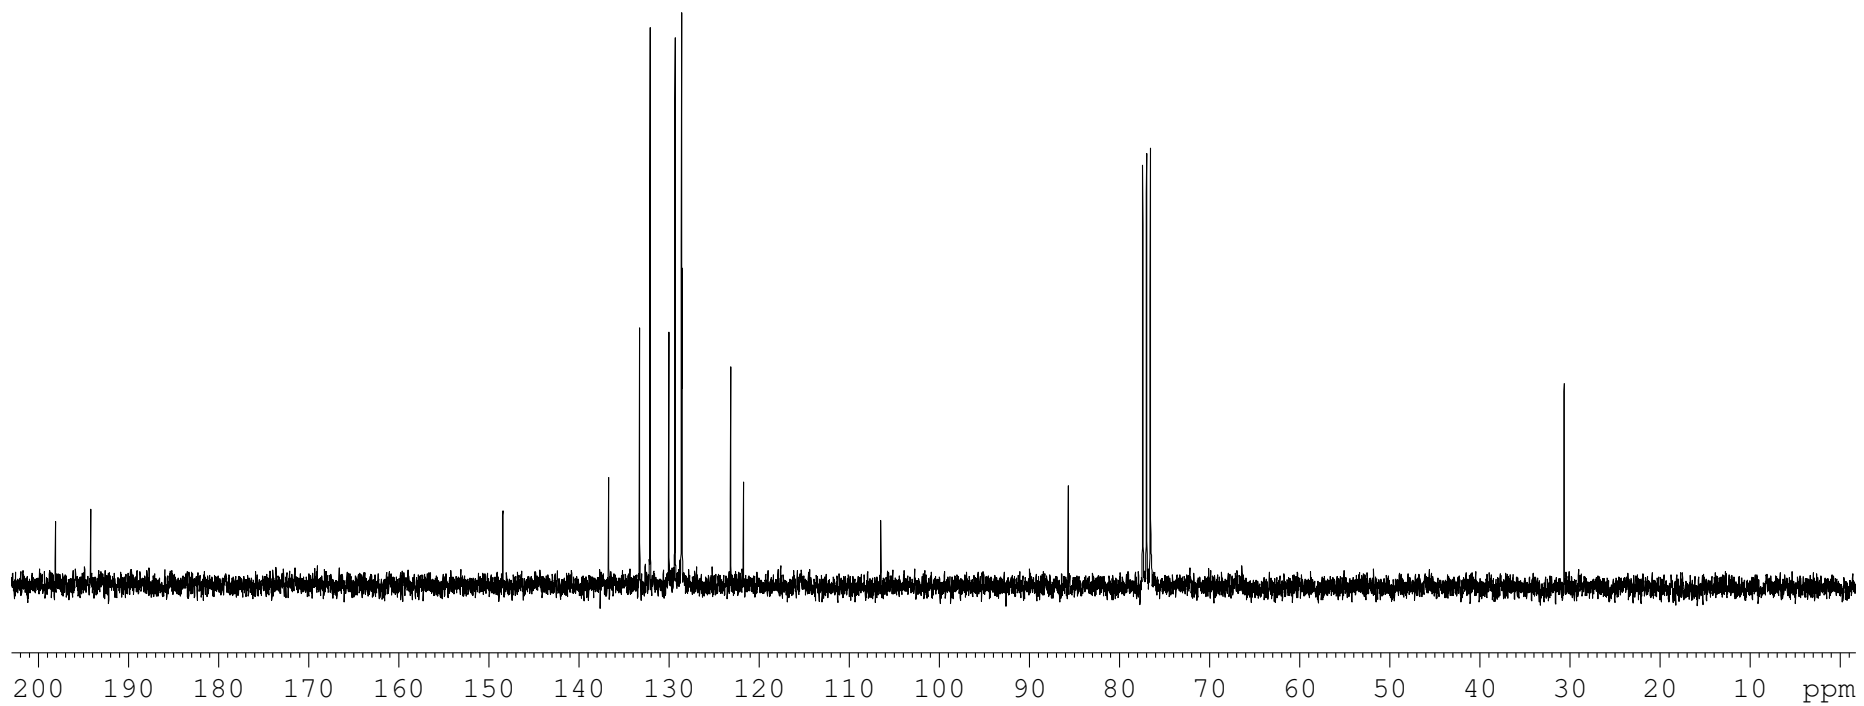

7.484  
7.463  
7.458  
7.414  
7.409  
7.389  
7.363  
7.339  
7.319  
7.310  
7.260  
7.038

3.818

2.515

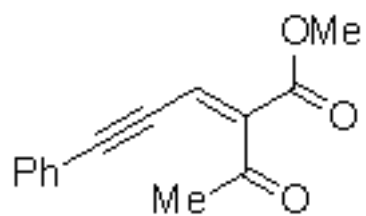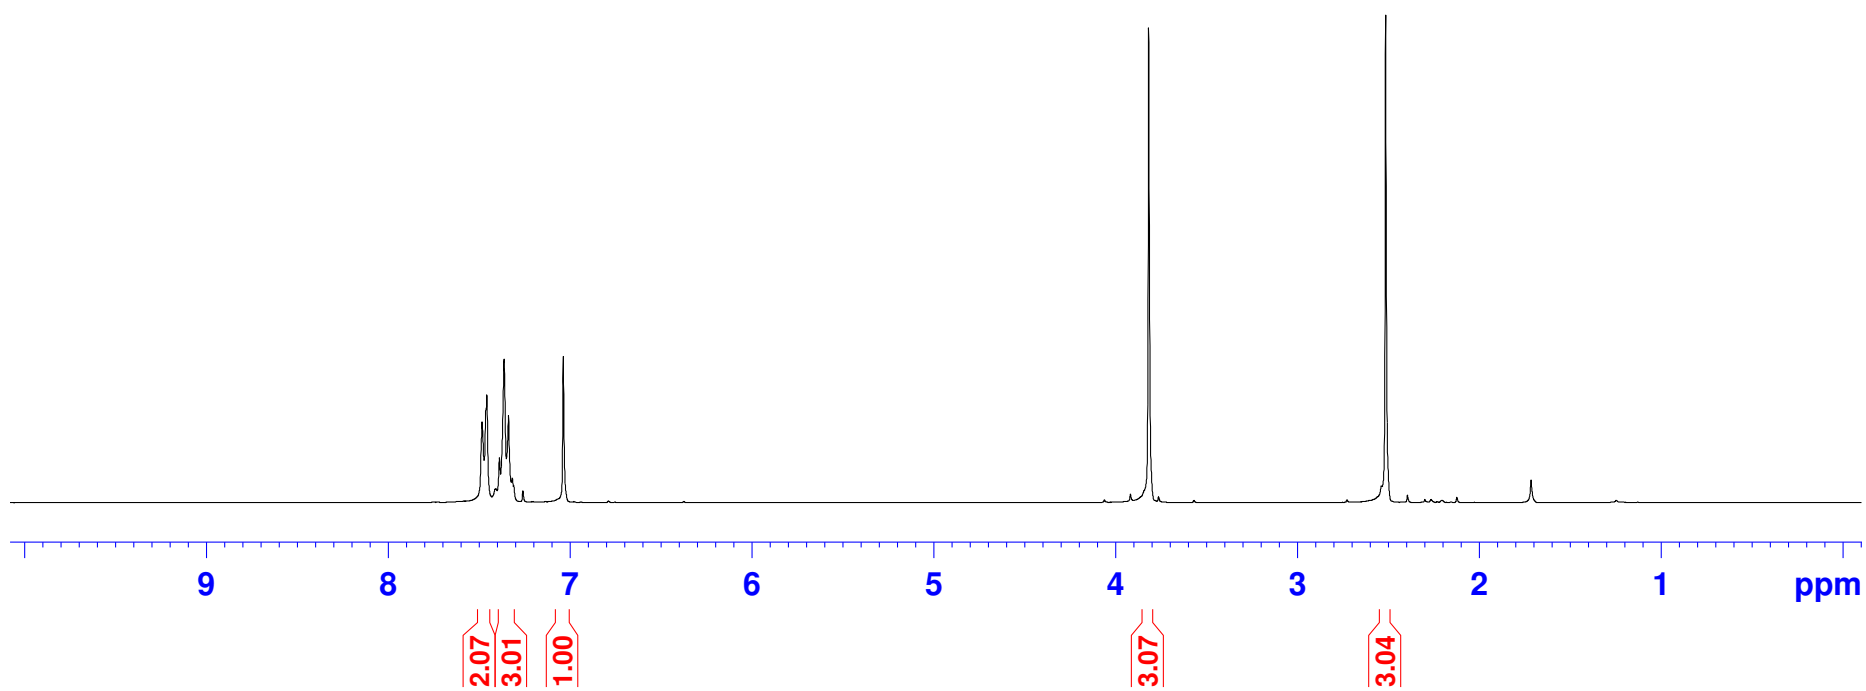

198.43

164.30

141.81

132.18

129.94

128.48

123.41

121.63

105.42

85.01

77.43

77.00

76.58

52.50

30.46

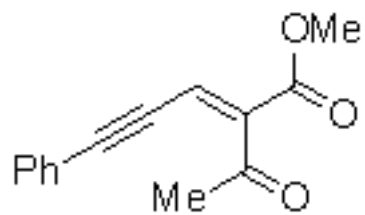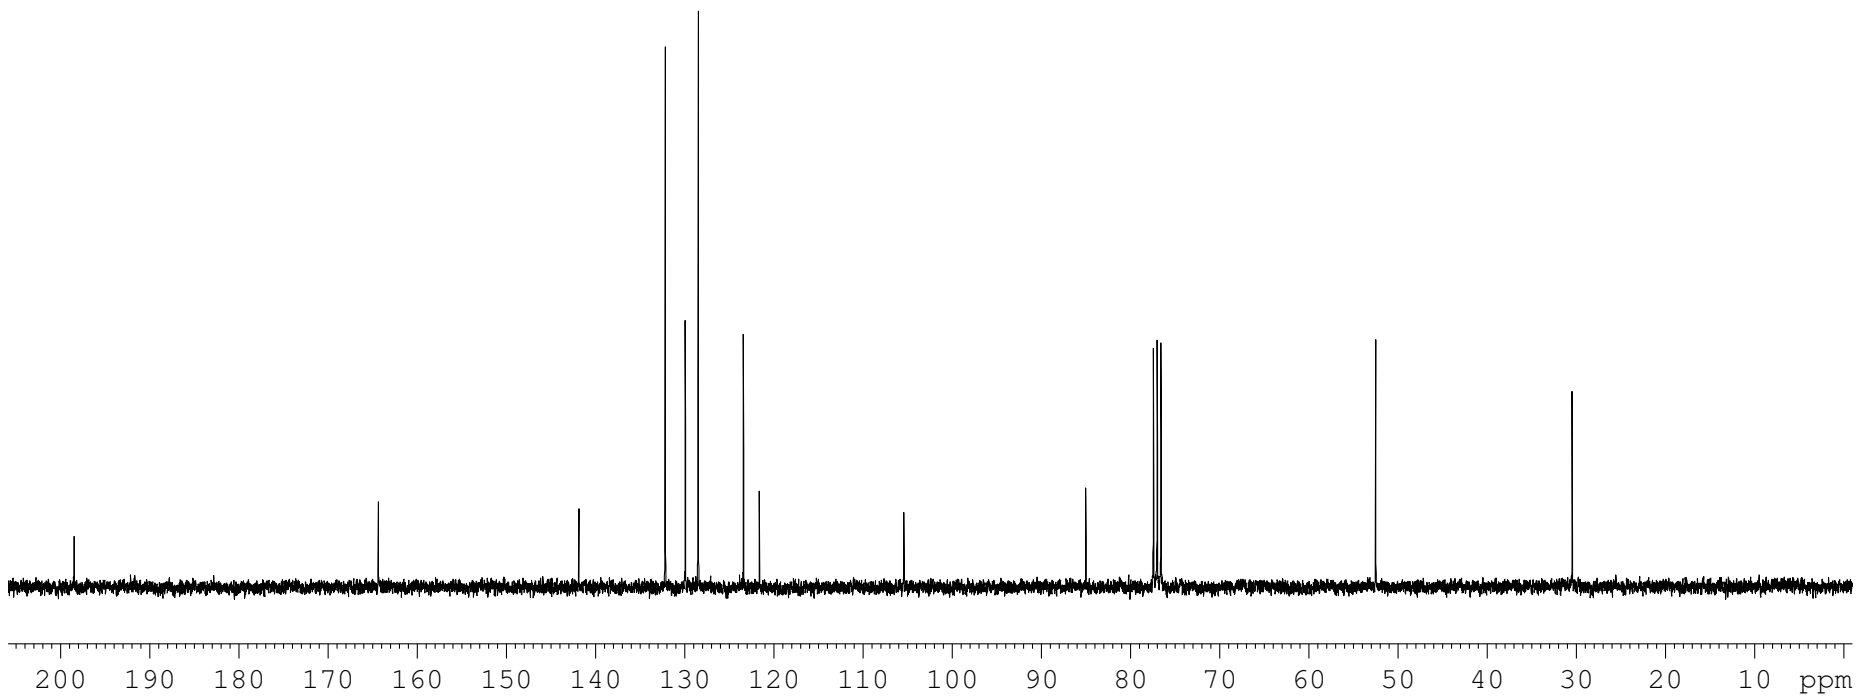



7.469  
7.457  
7.449  
7.443  
7.421  
7.407  
7.401  
7.381  
7.355  
7.341  
7.331  
7.311  
7.302  
7.260  
7.013

3.900

2.375

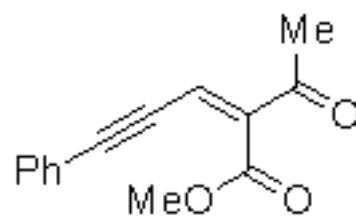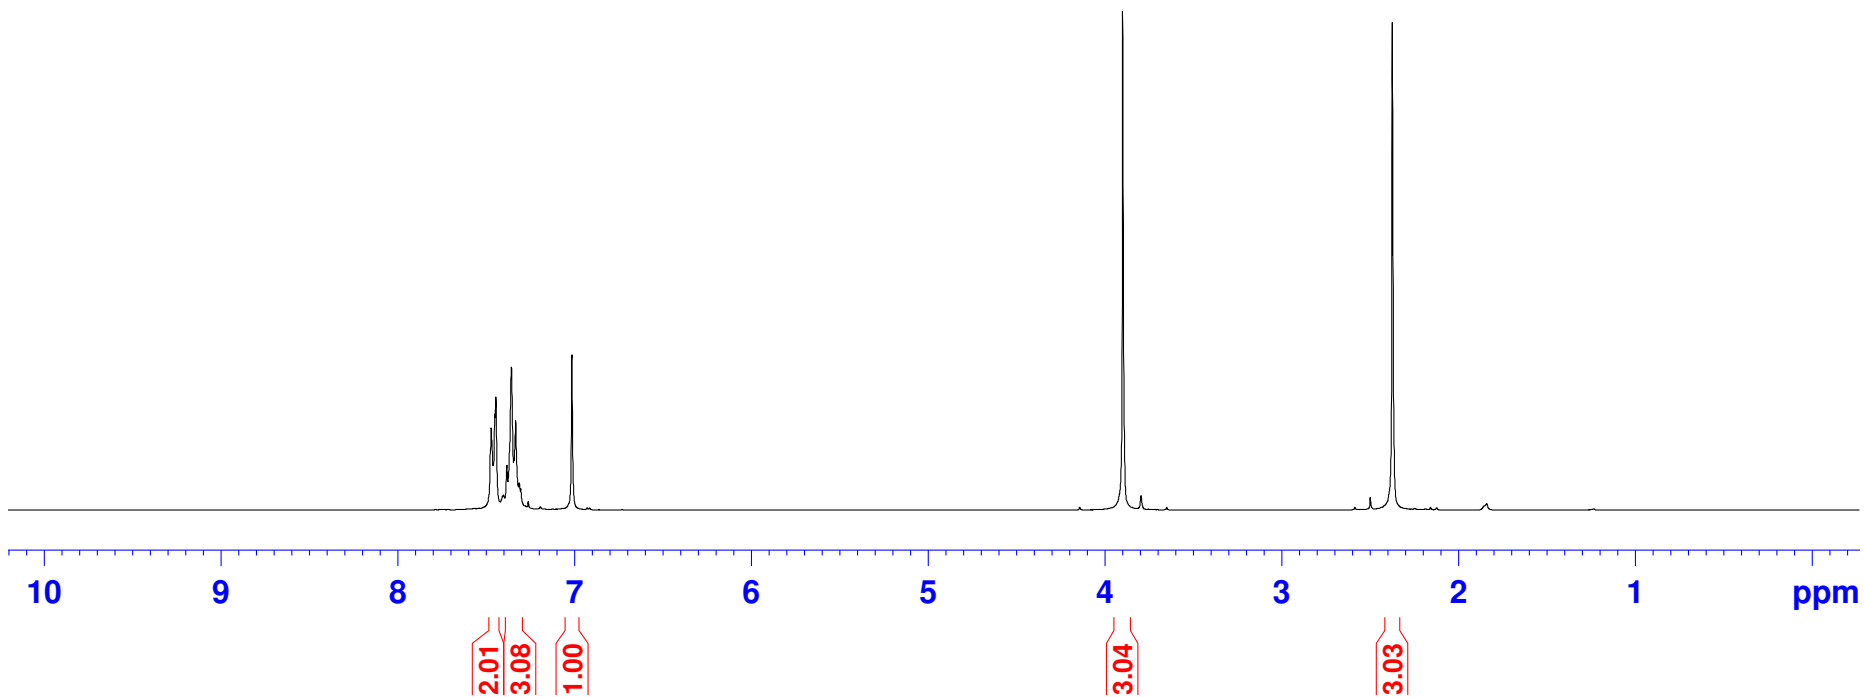

193.73

165.61

141.01

132.16

129.94

128.45

124.88

121.70

106.60

85.37

77.42

77.00

76.57

52.16

27.48

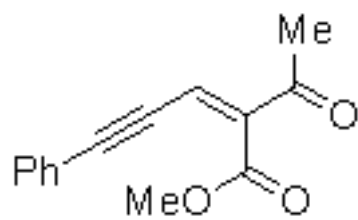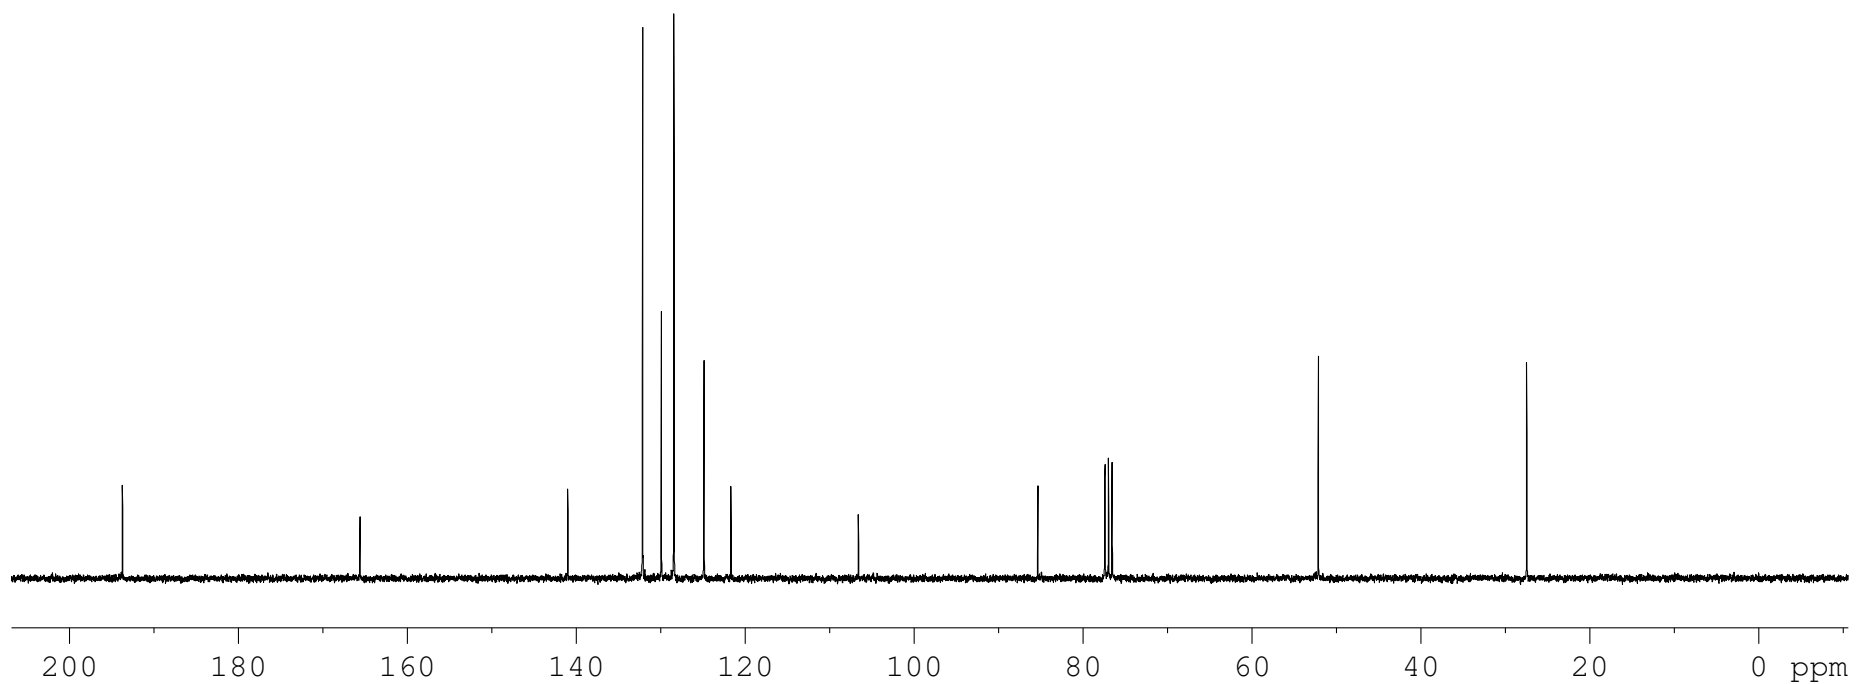

7.994  
7.967  
7.824  
7.798  
7.625  
7.601  
7.575  
7.549  
7.518  
7.492  
7.466  
7.431  
7.385  
7.362  
7.305  
7.281  
7.260  
7.228  
7.204  
7.178  
7.092  
7.066  
6.820

4.280  
4.256  
4.232  
4.208

1.233  
1.210  
1.186

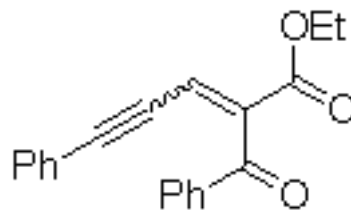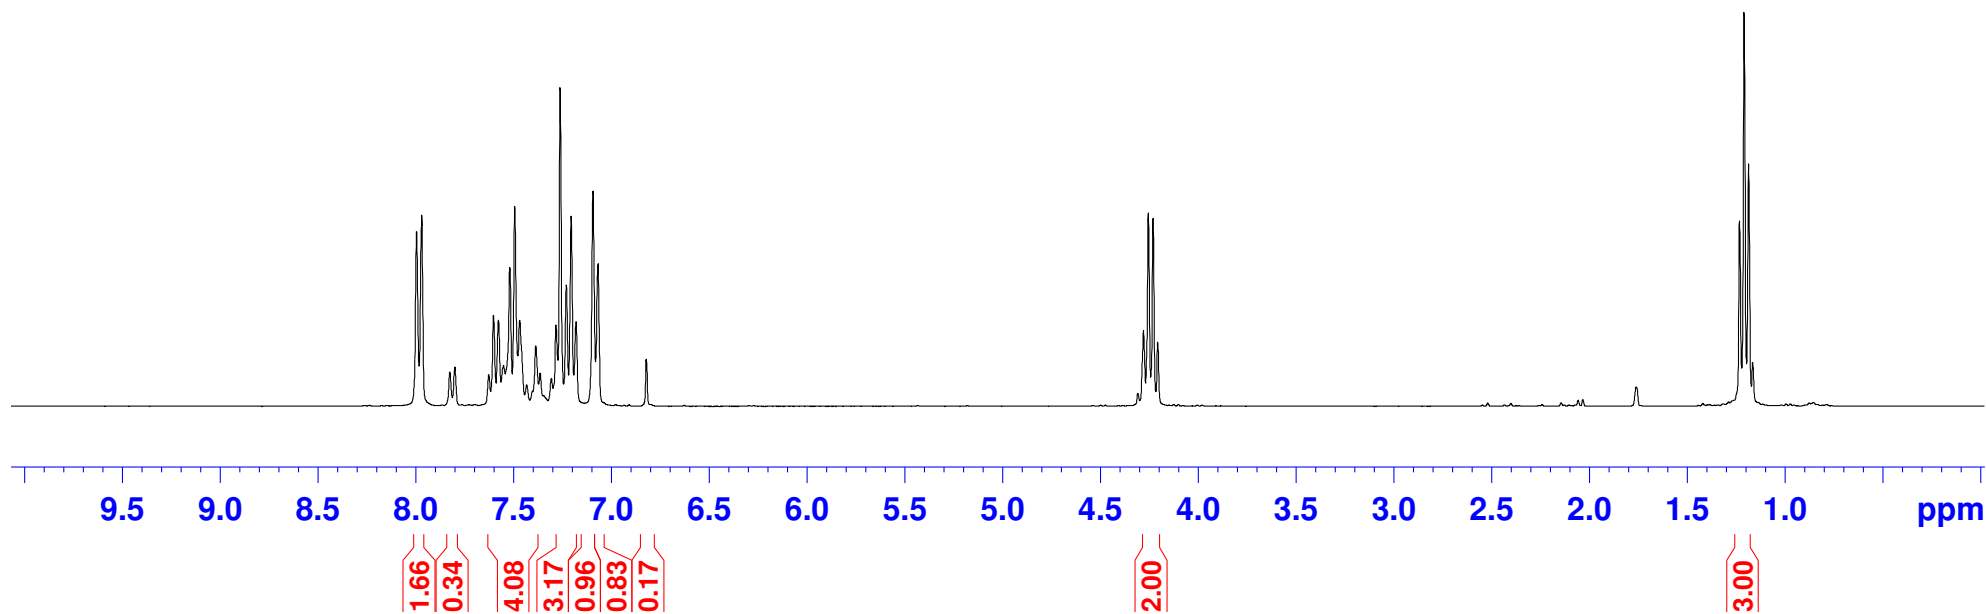

192.71  
192.00

164.22  
163.87

141.02  
136.83  
135.98  
133.72  
133.06  
132.17  
131.90  
129.81  
129.59  
129.34  
128.91  
128.63  
128.45  
128.20  
125.55  
123.55  
121.97  
121.45  
106.07  
104.70

85.45  
84.76  
77.42  
77.00  
76.58

61.64  
61.32

13.92  
13.89

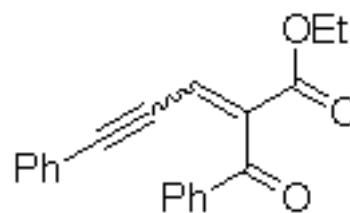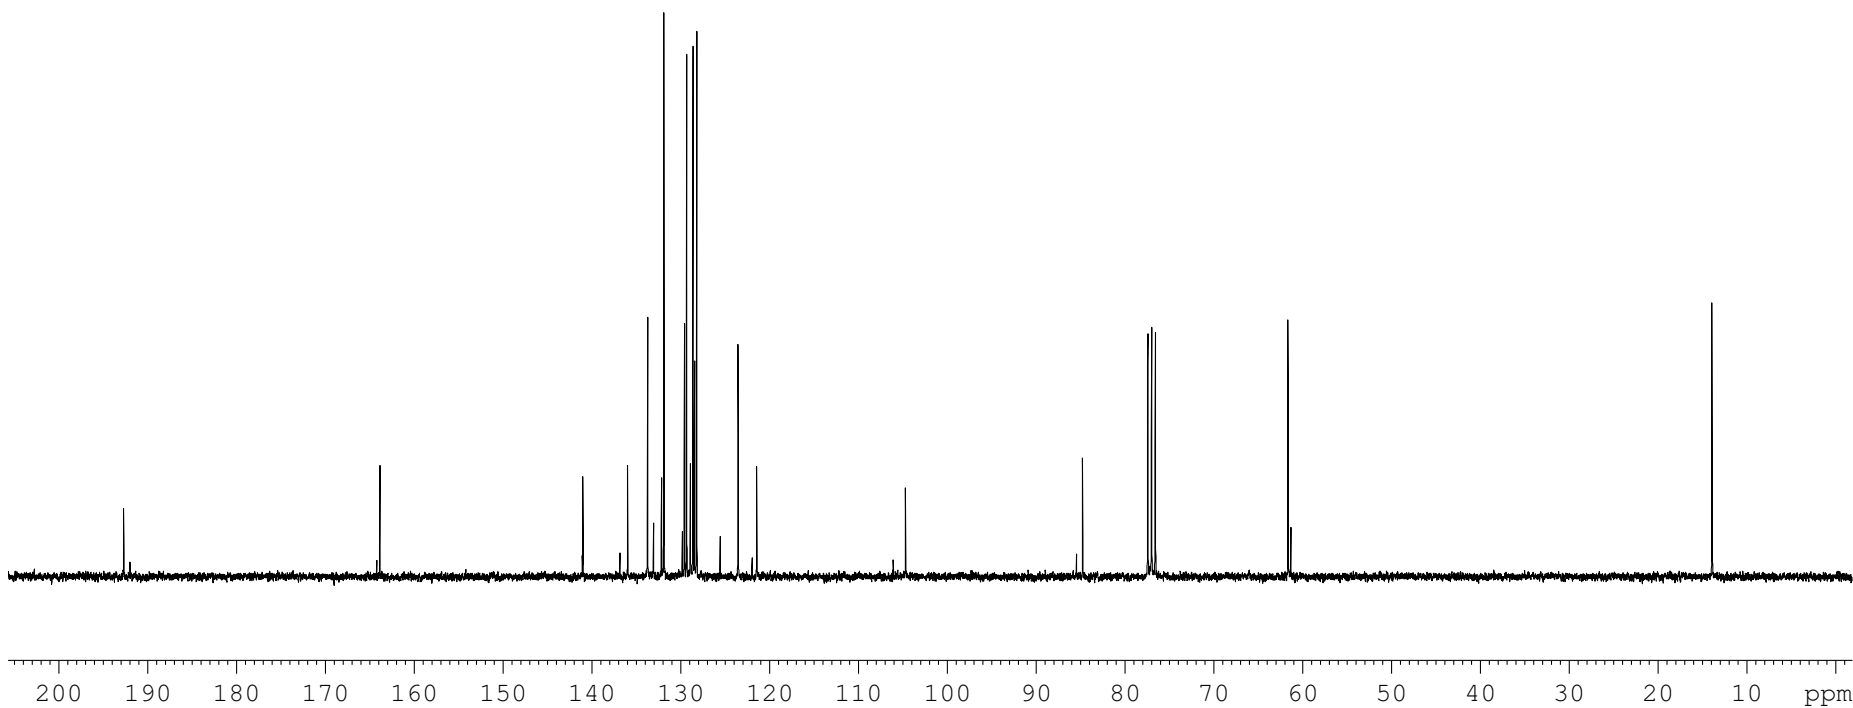

7.965  
7.941  
7.621  
7.599  
7.576  
7.553  
7.532  
7.507  
7.470  
7.459  
7.446  
7.420  
7.283  
7.260  
7.236  
7.183  
7.158  
7.131  
6.916  
6.892  
6.889

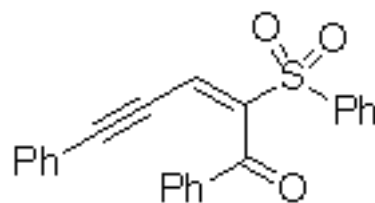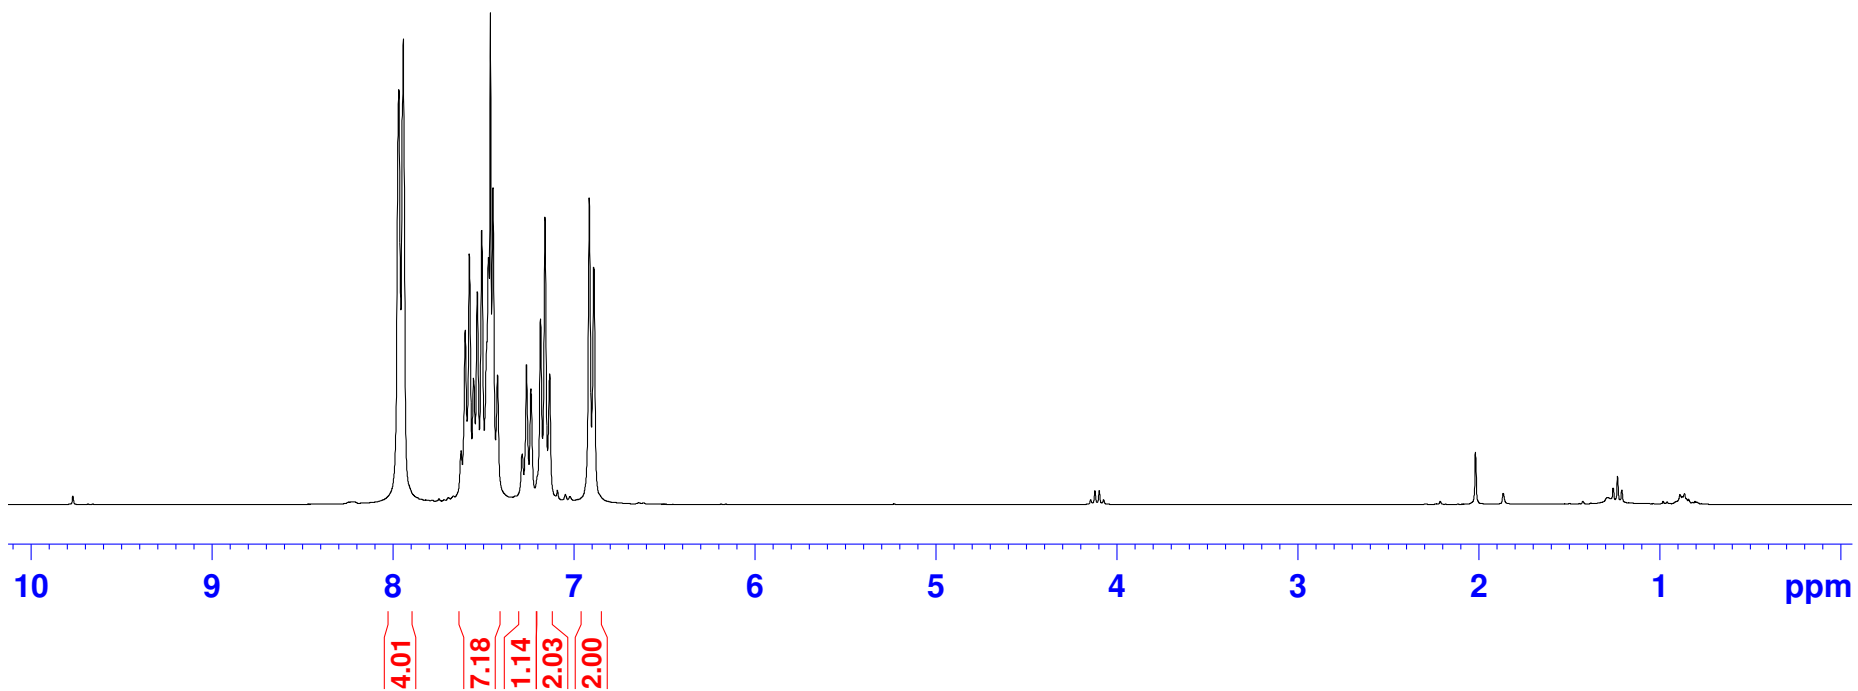

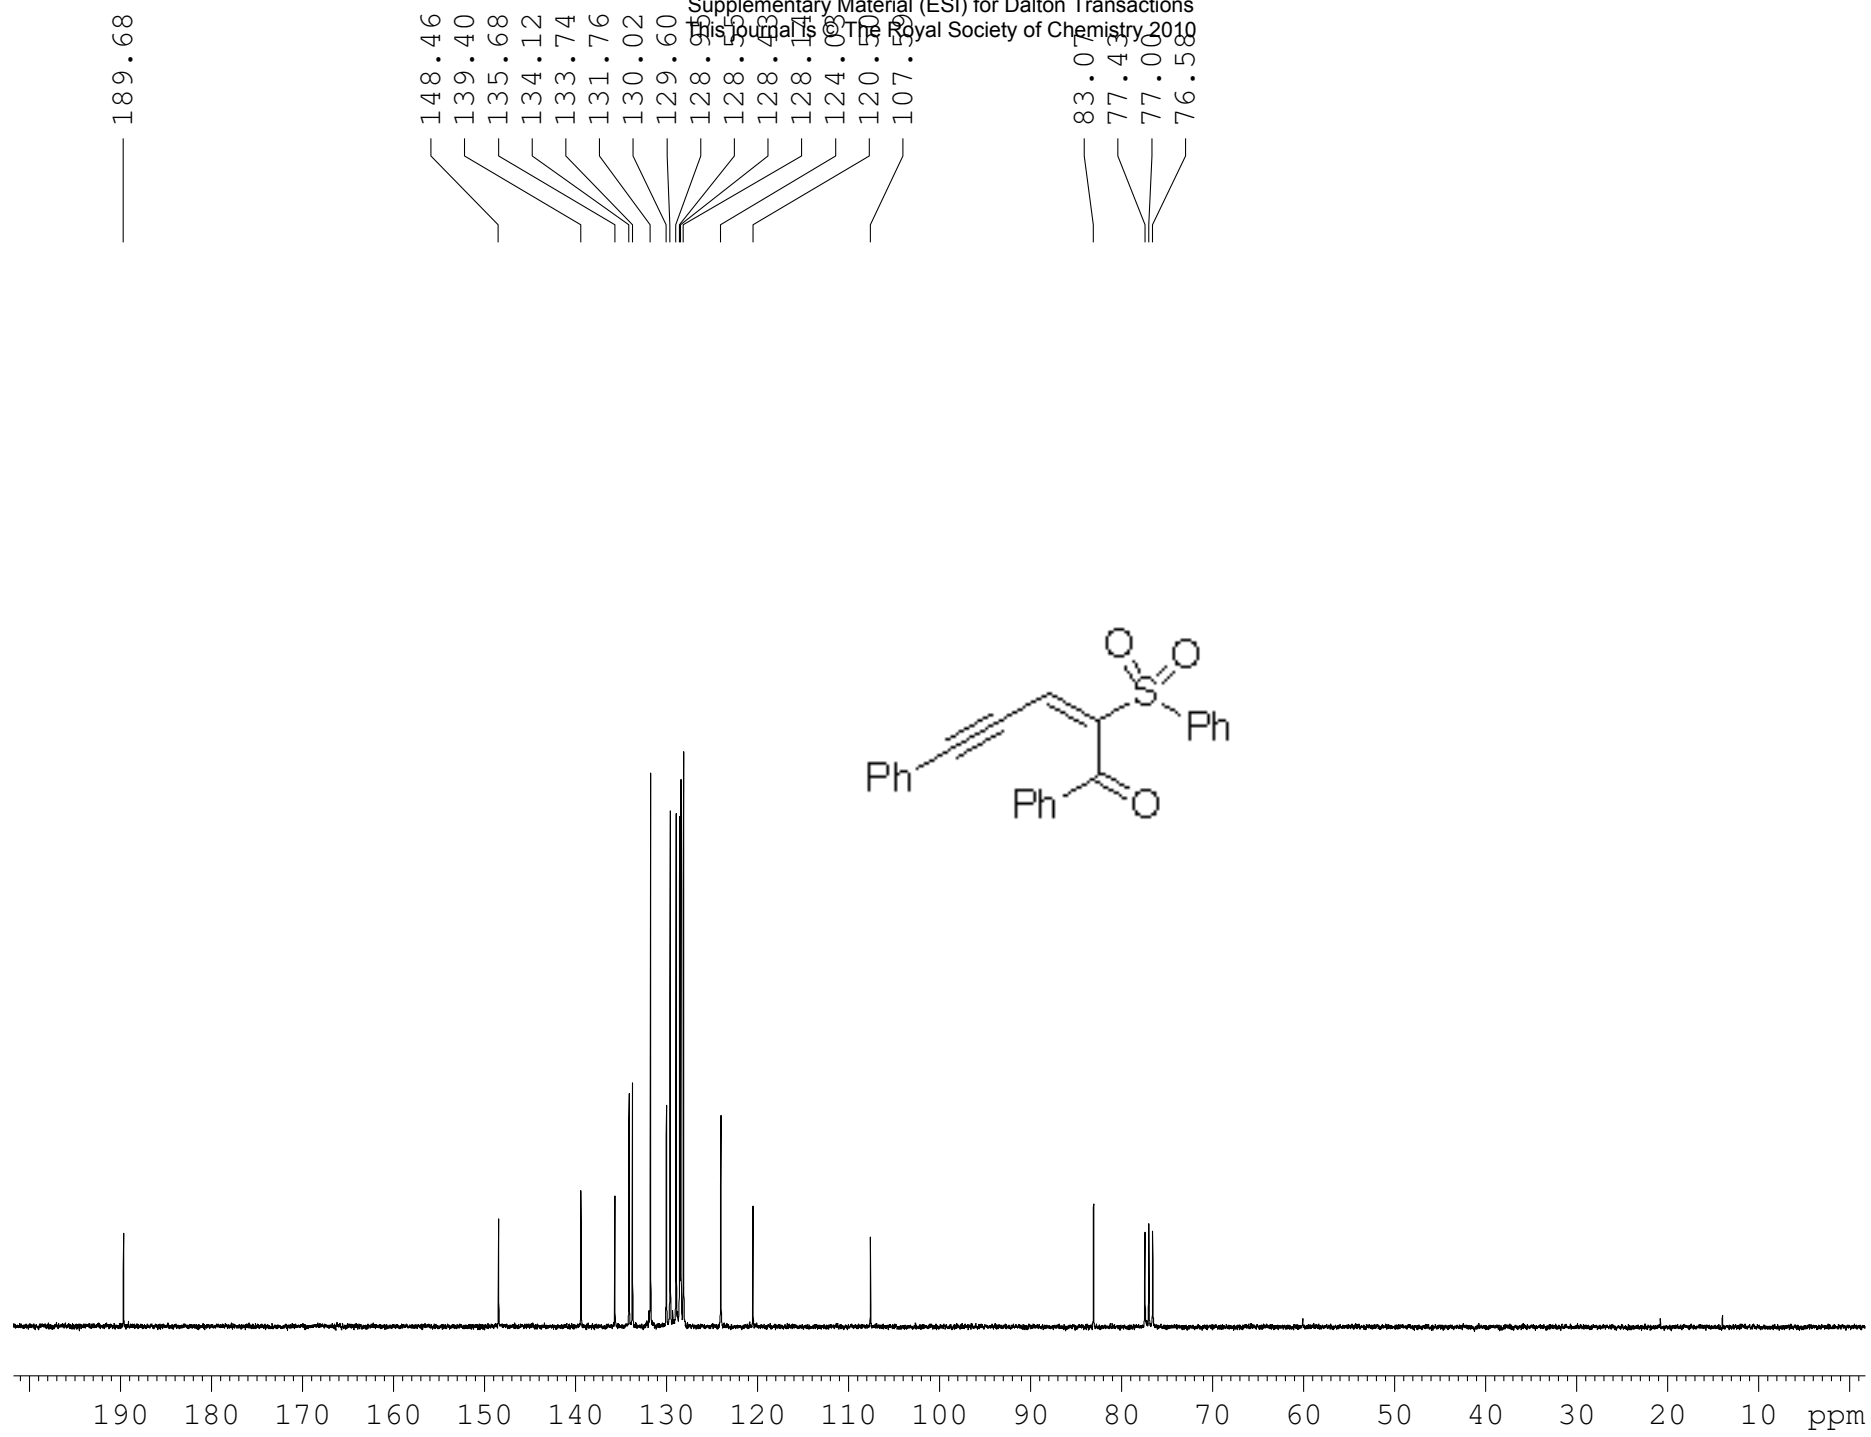

7.910  
7.885  
7.604  
7.580  
7.555  
7.500  
7.475  
7.450  
7.367  
7.260

2.698  
2.428

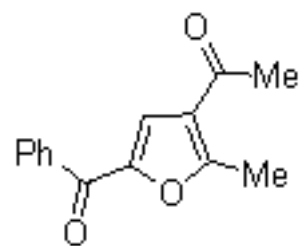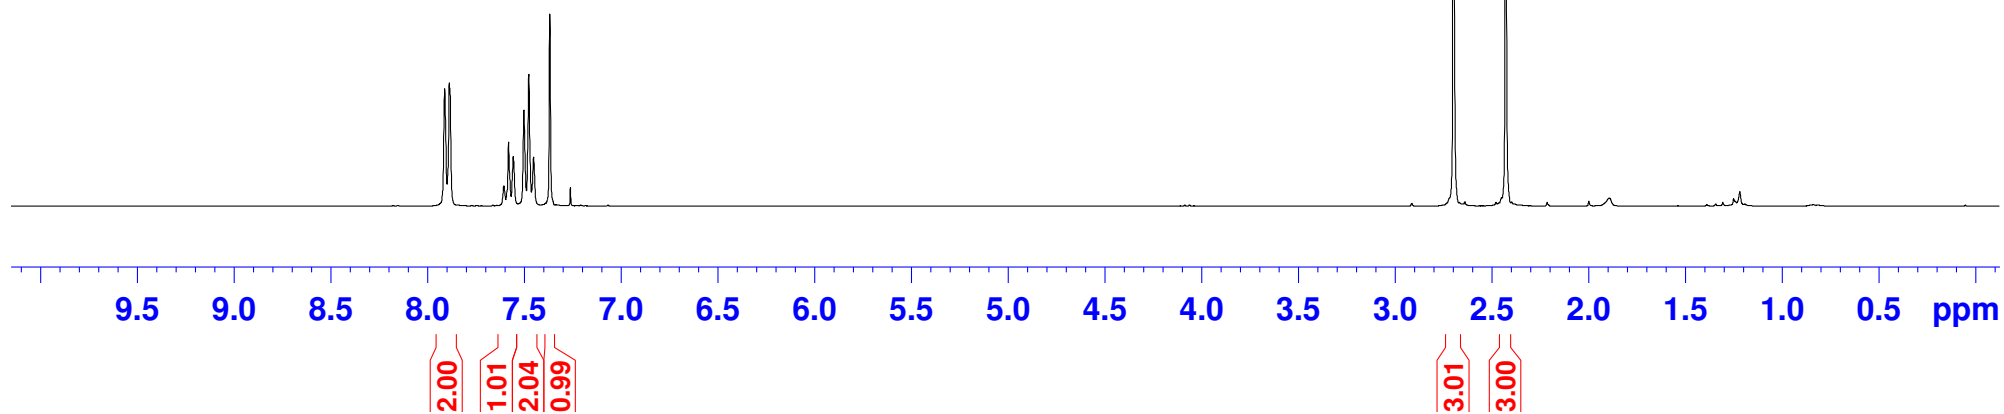

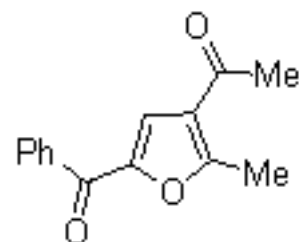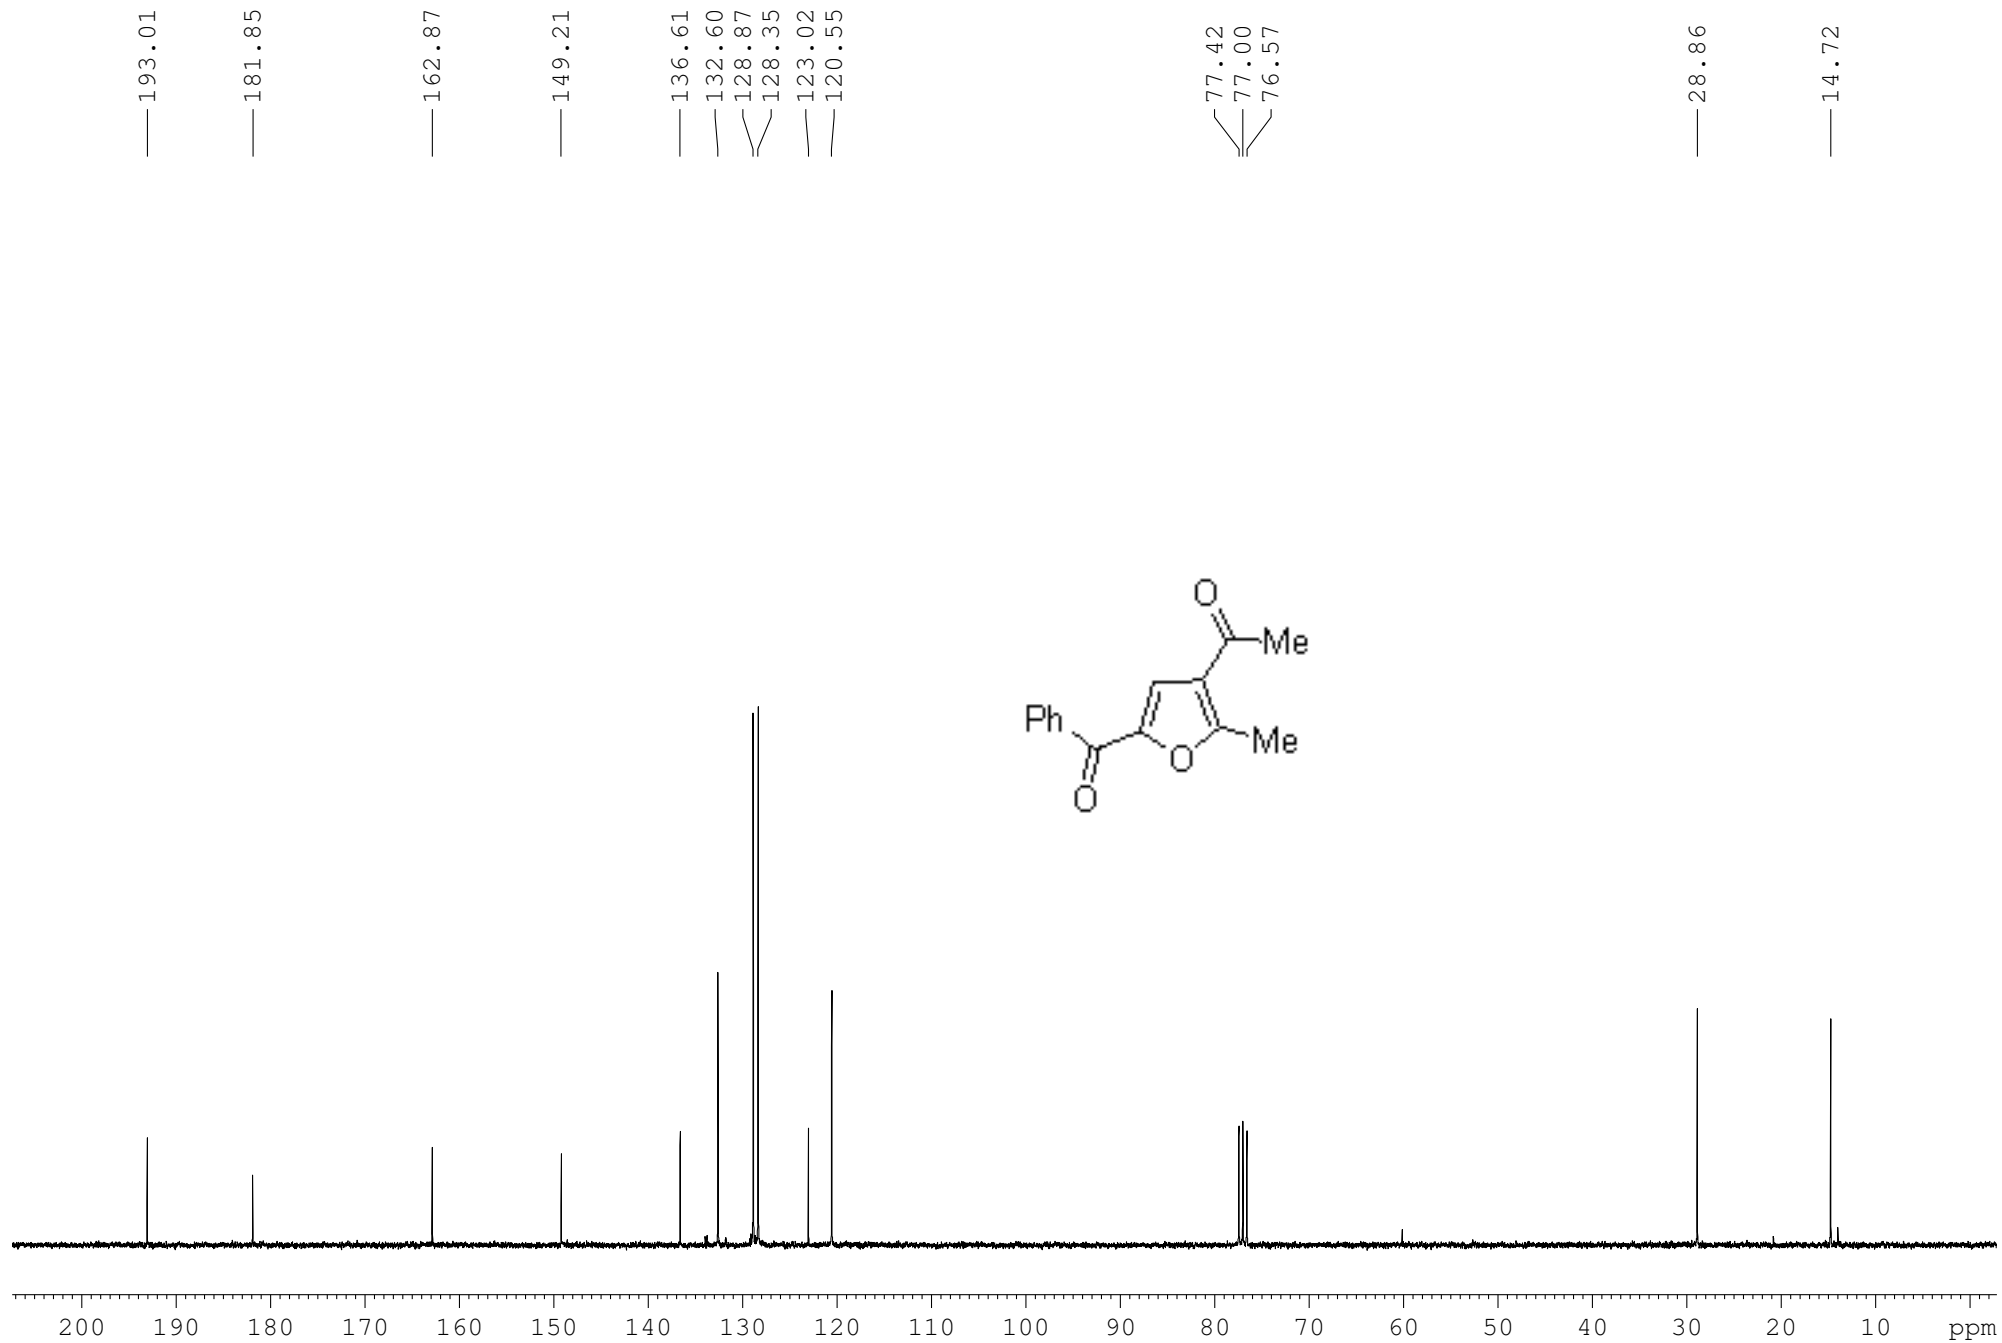



7.991  
7.963

7.377  
7.260  
6.995  
6.967

3.881

2.716  
2.454

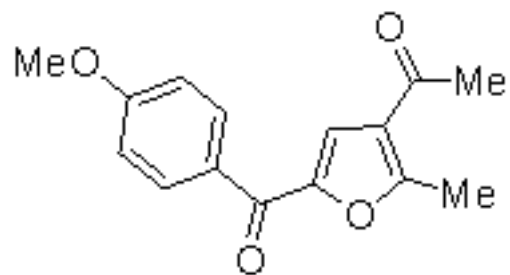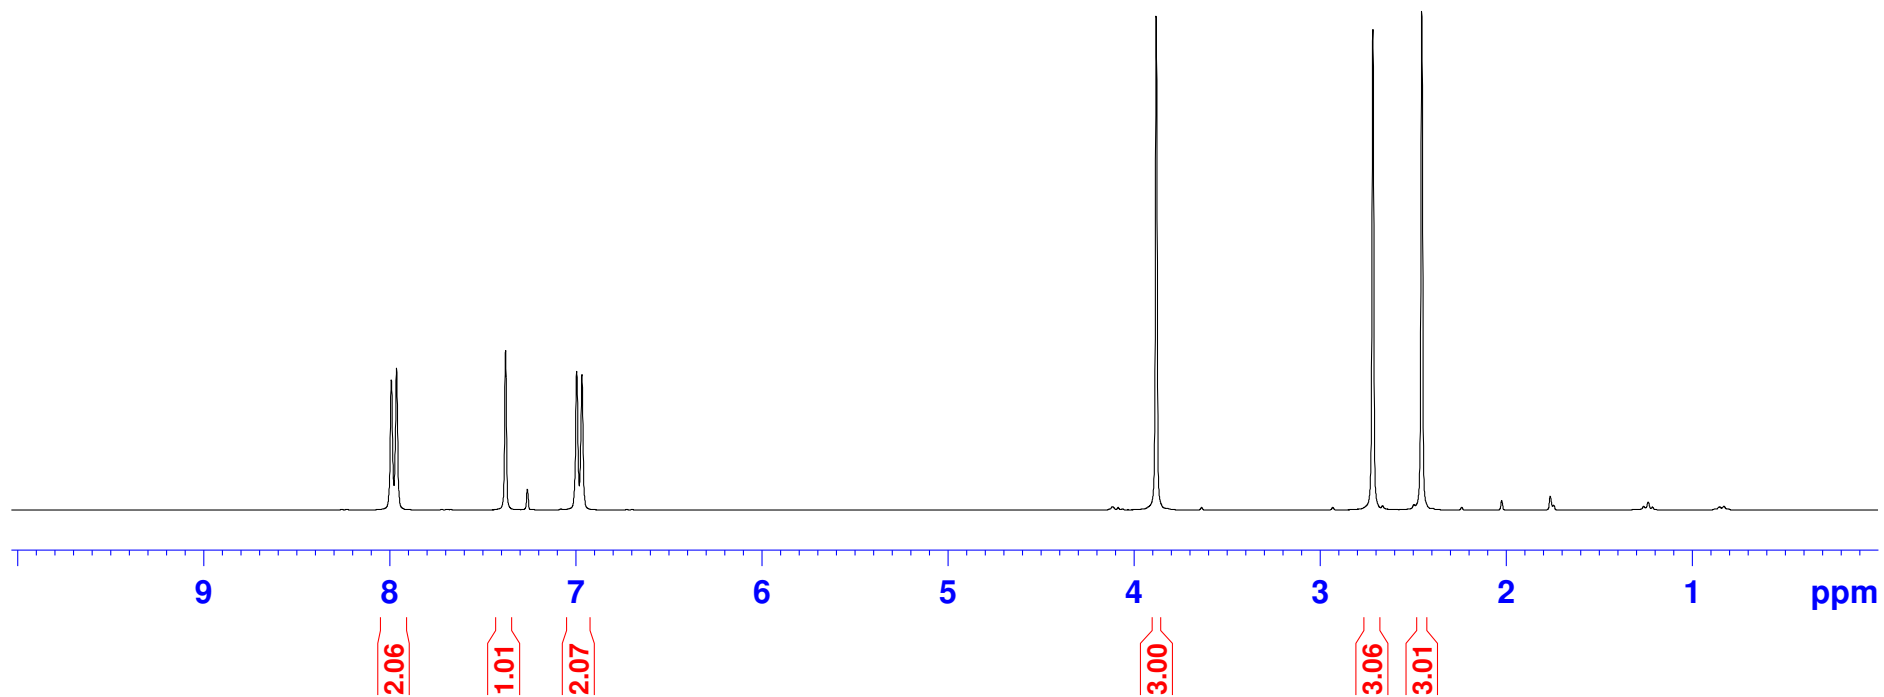

193.34

180.66

163.46  
162.46

149.84

131.54  
129.39

123.07  
119.77

113.81

77.42  
77.00  
76.57

55.47

29.04

14.90

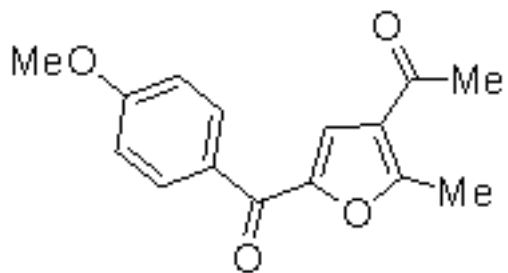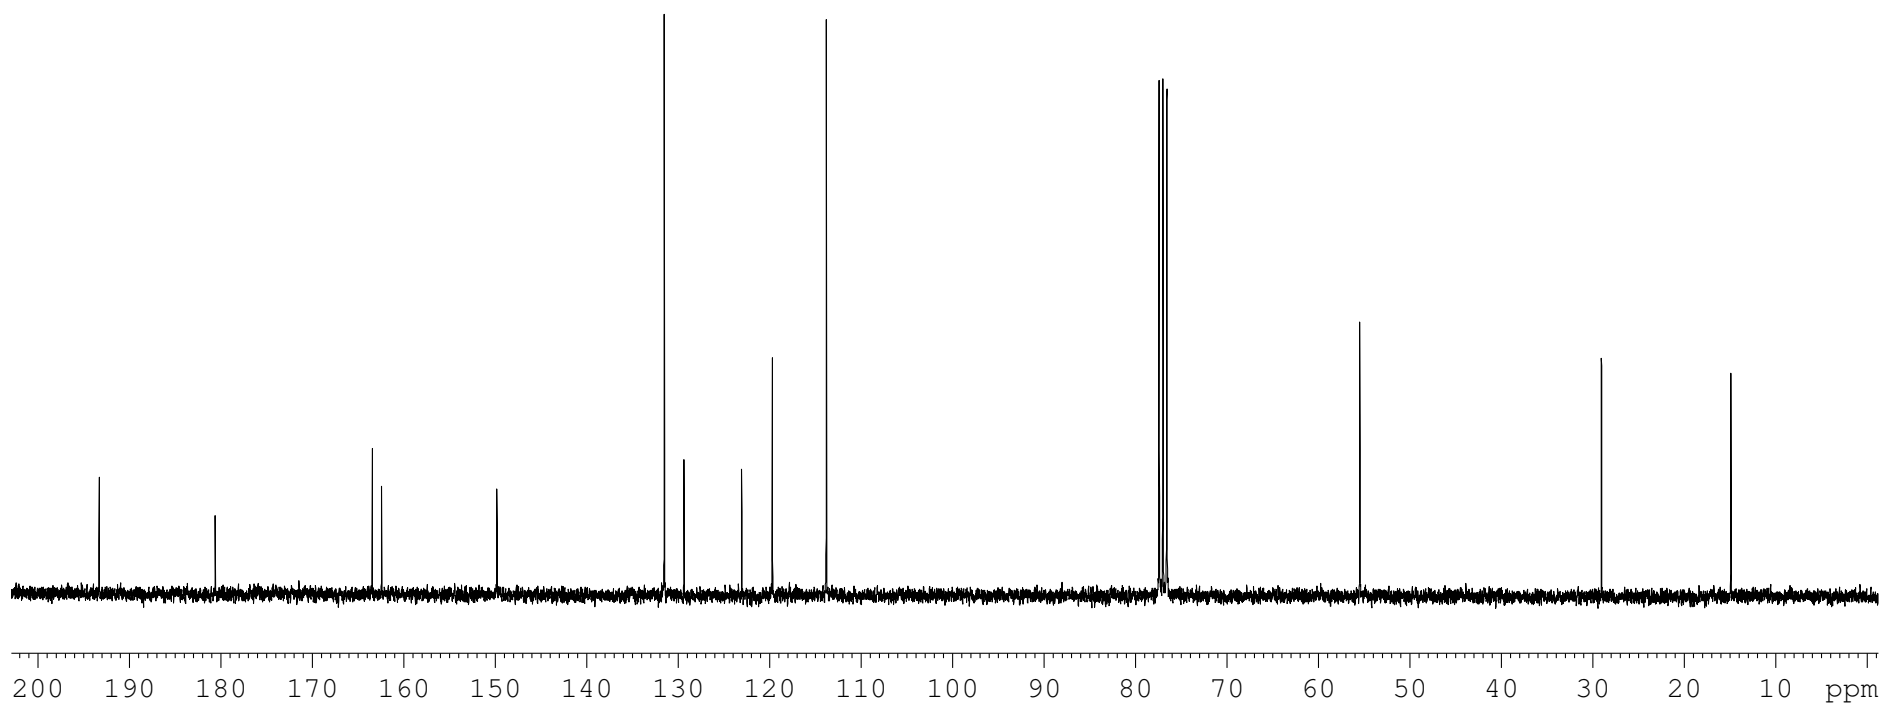

7.856  
7.830  
7.374  
7.310  
7.284

2.716  
2.447  
2.431

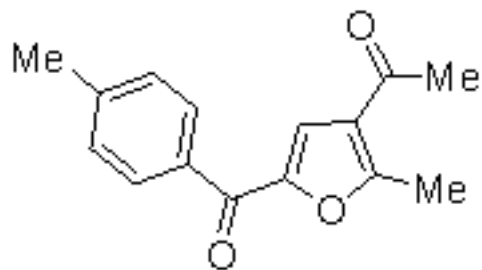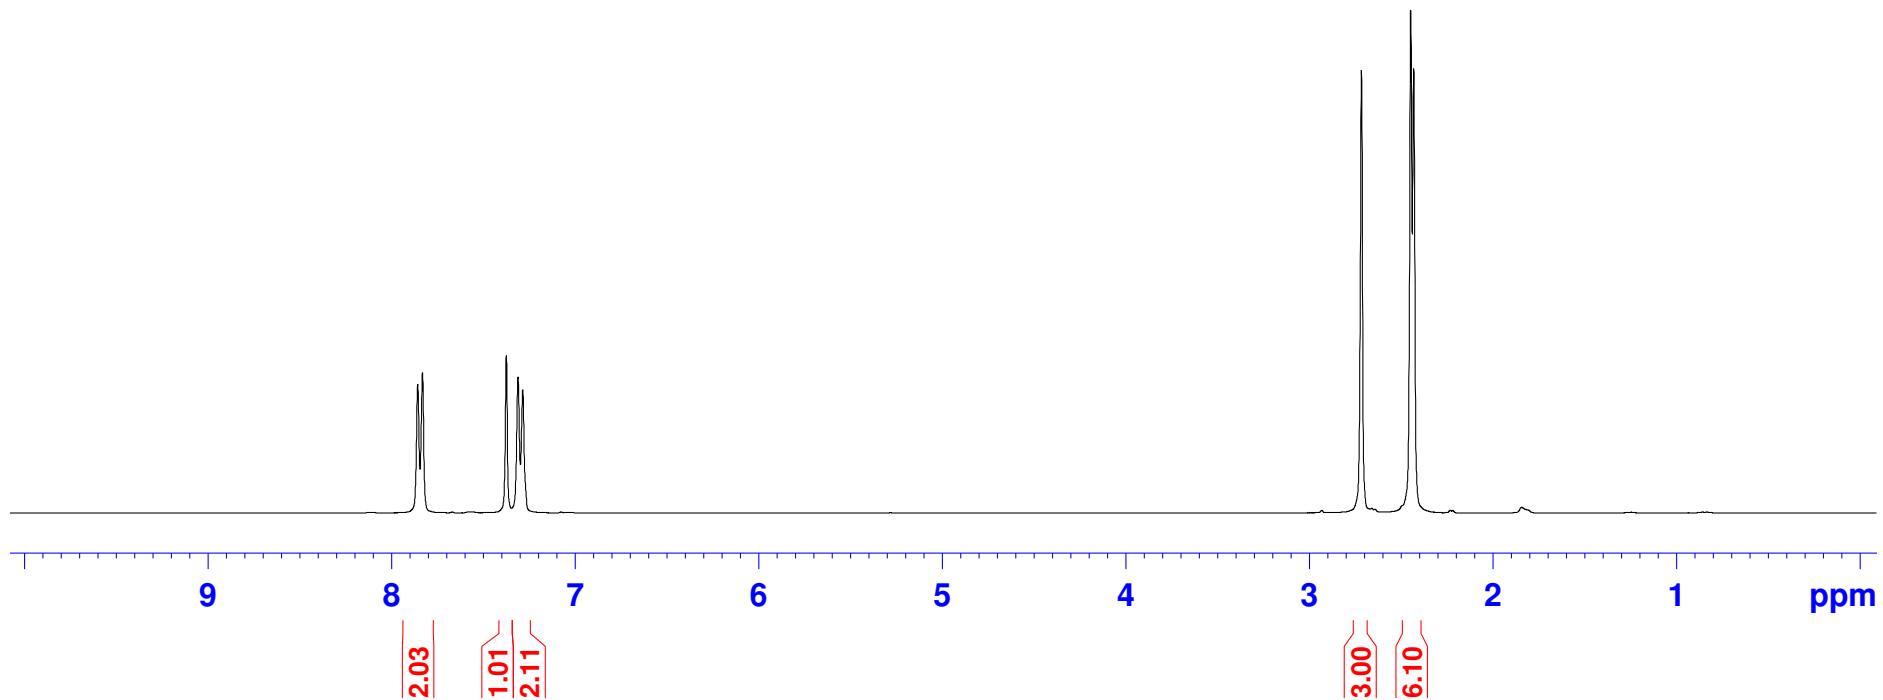

193.19

181.72

162.73

149.60

143.61

134.11

129.20

129.16

123.08

120.18

77.43

77.00

76.58

28.96

21.56

14.83

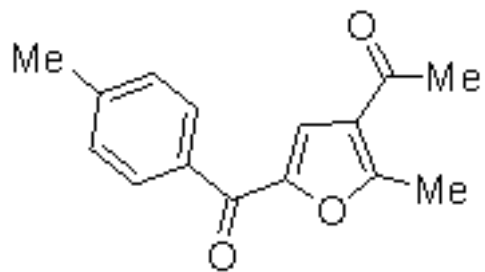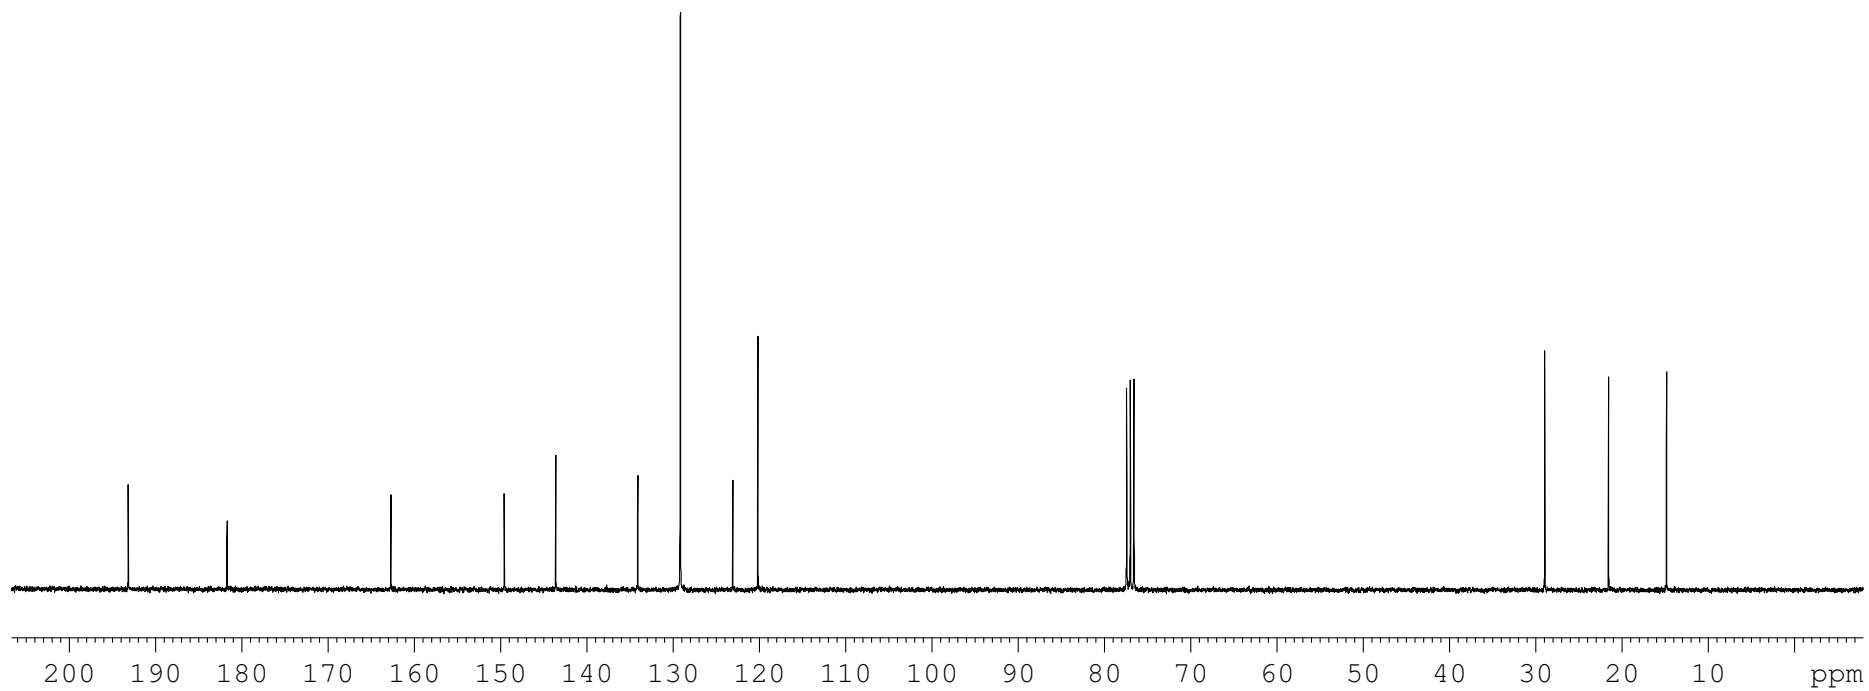

8.373  
8.347  
8.111  
8.085  
7.474  
7.260

2.749  
2.476

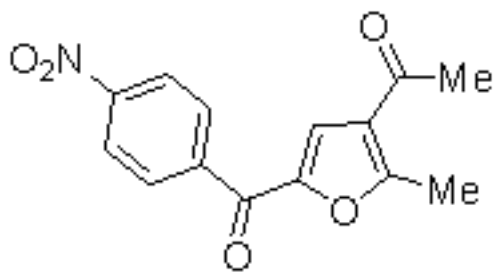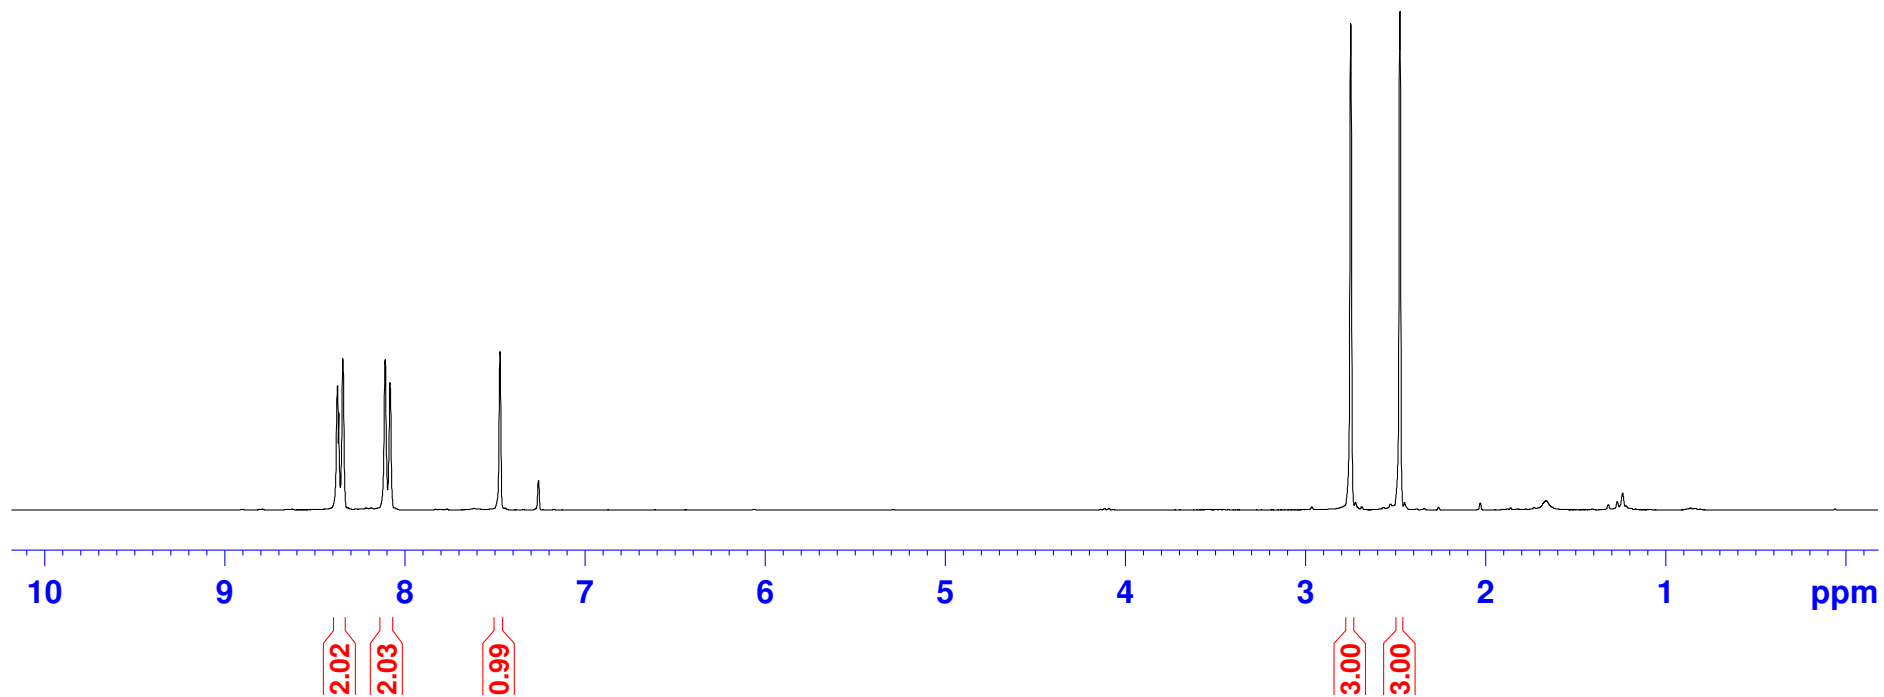

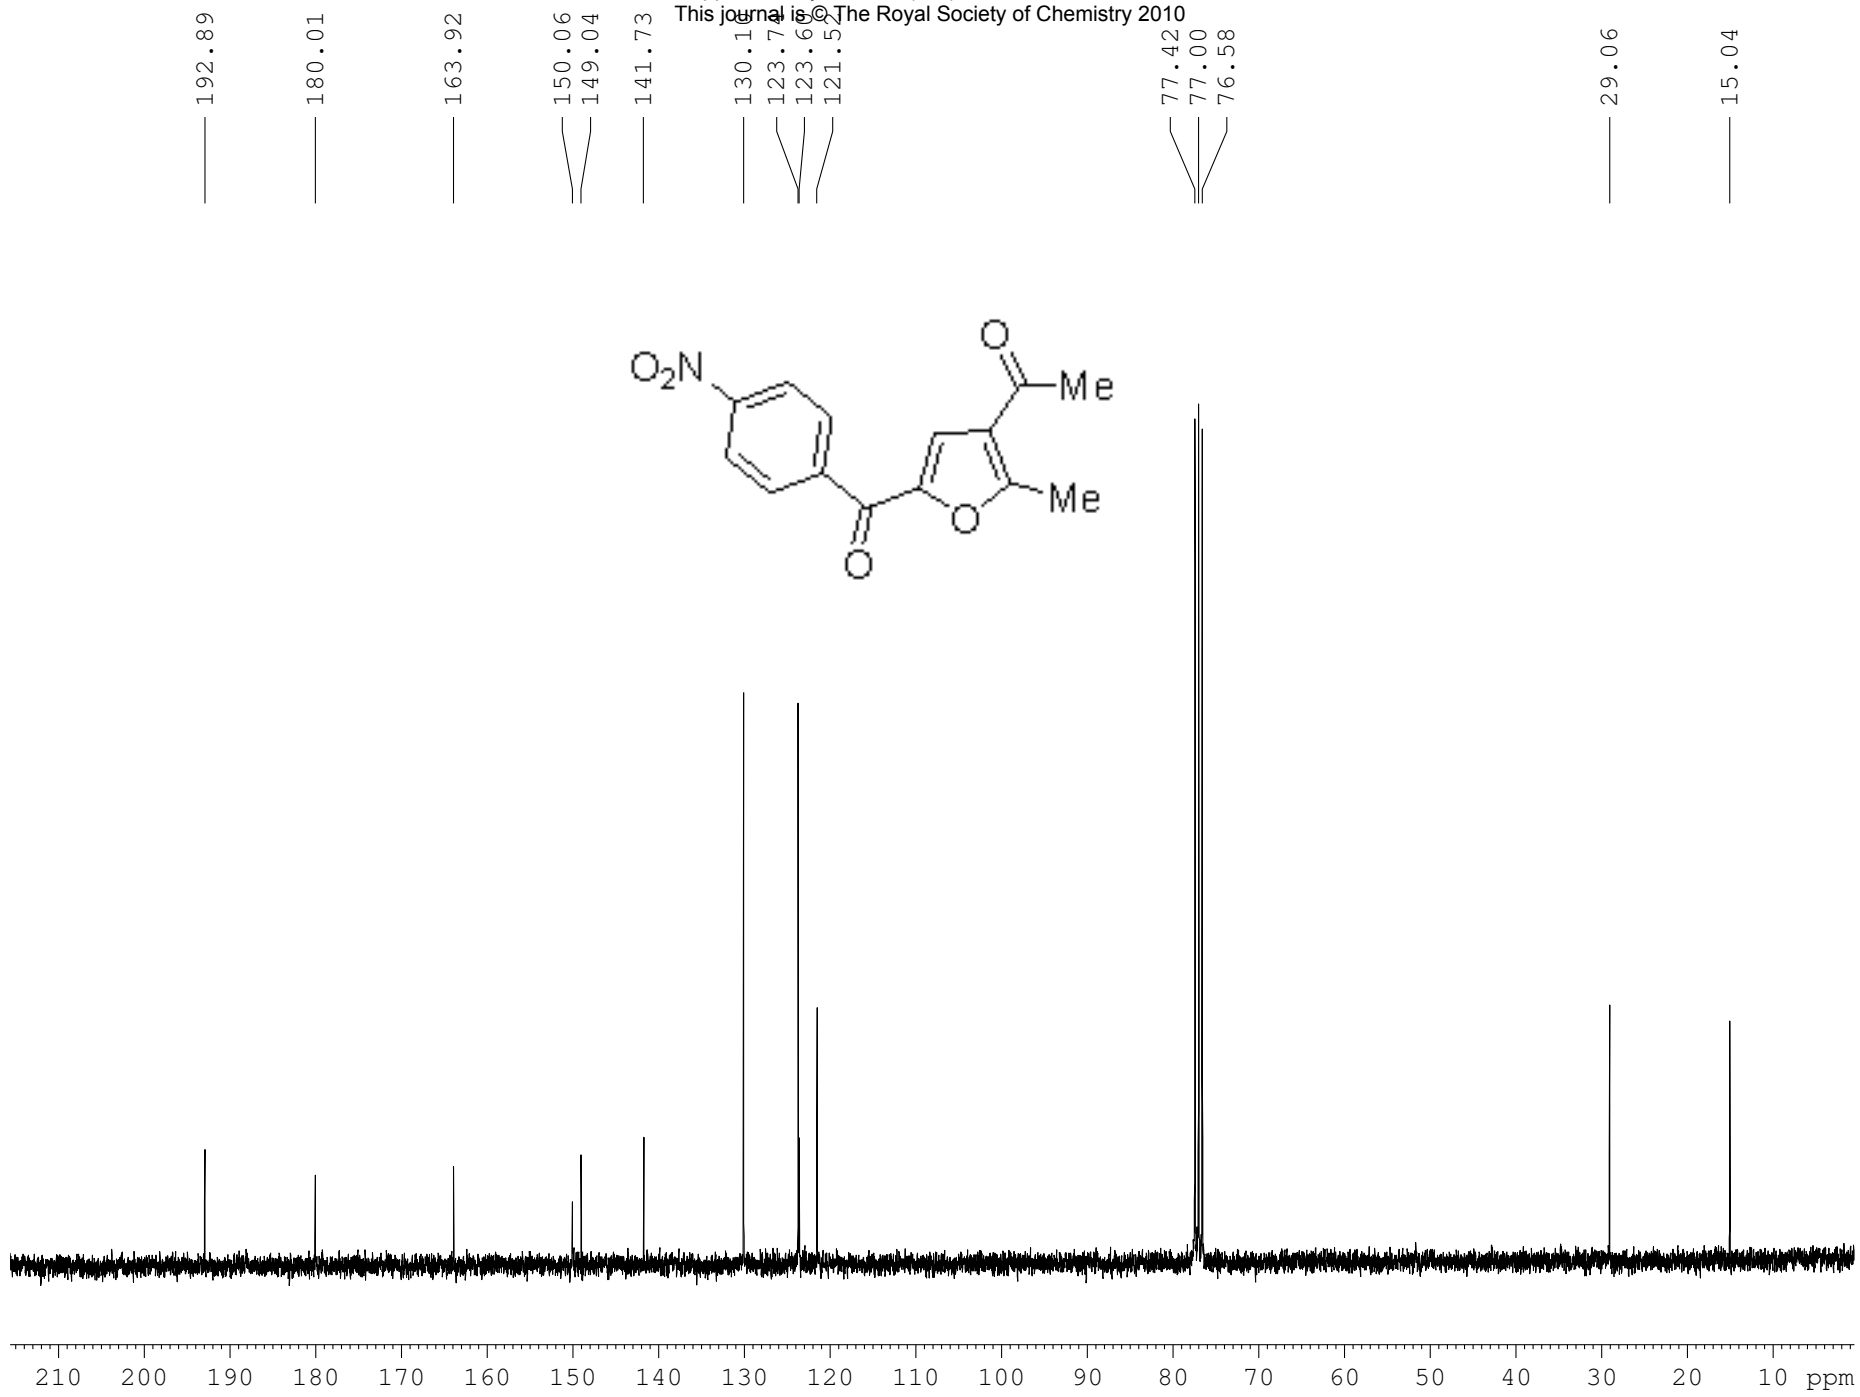

8.216  
8.204  
8.185  
8.036  
8.009  
7.921  
7.912  
7.903  
7.891  
7.759  
7.736  
7.557  
7.529  
7.504  
7.260  
7.188

2.736  
2.378

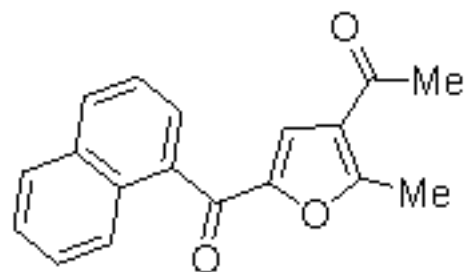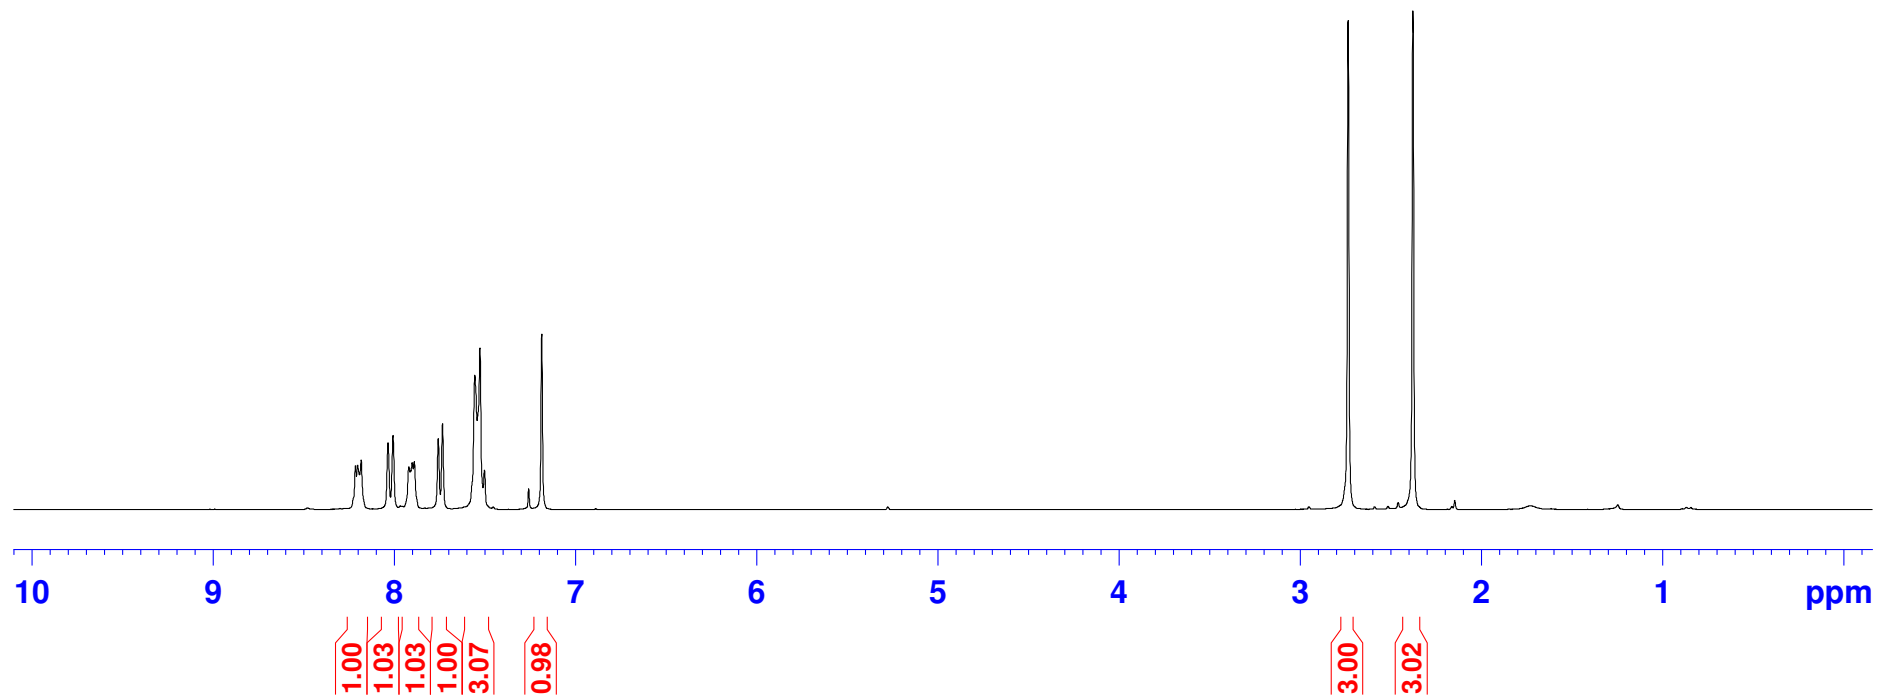

193.08

183.75

163.83

150.31

134.64

133.72

131.94

130.54

128.38

127.54

127.36

126.65

125.09

124.20

123.30

121.62

77.42

77.00

76.58

28.95

14.96

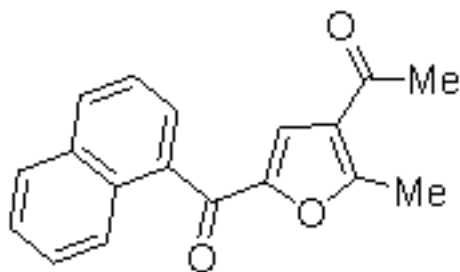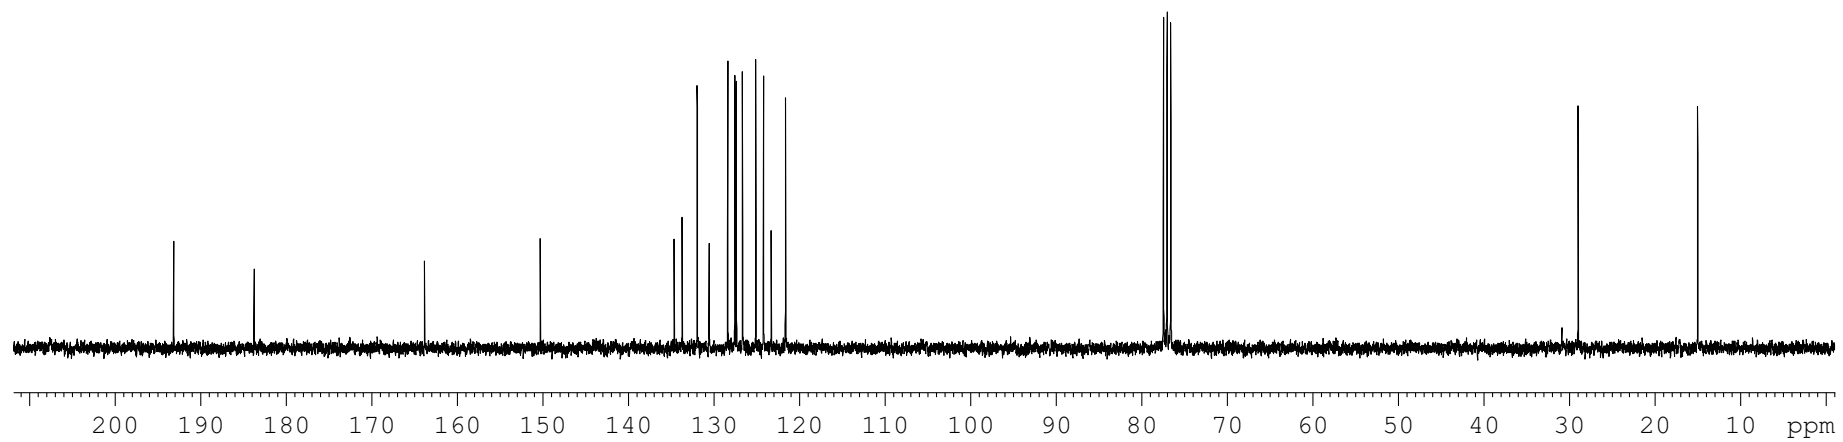



7.330  
7.260

2.763  
2.738  
2.713  
2.619  
2.402  
1.692  
1.668  
1.642  
1.617  
1.592  
1.404  
1.379  
1.354  
1.329  
1.304  
1.280  
0.911  
0.886  
0.862

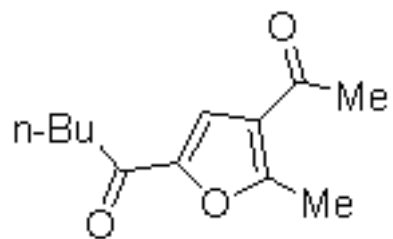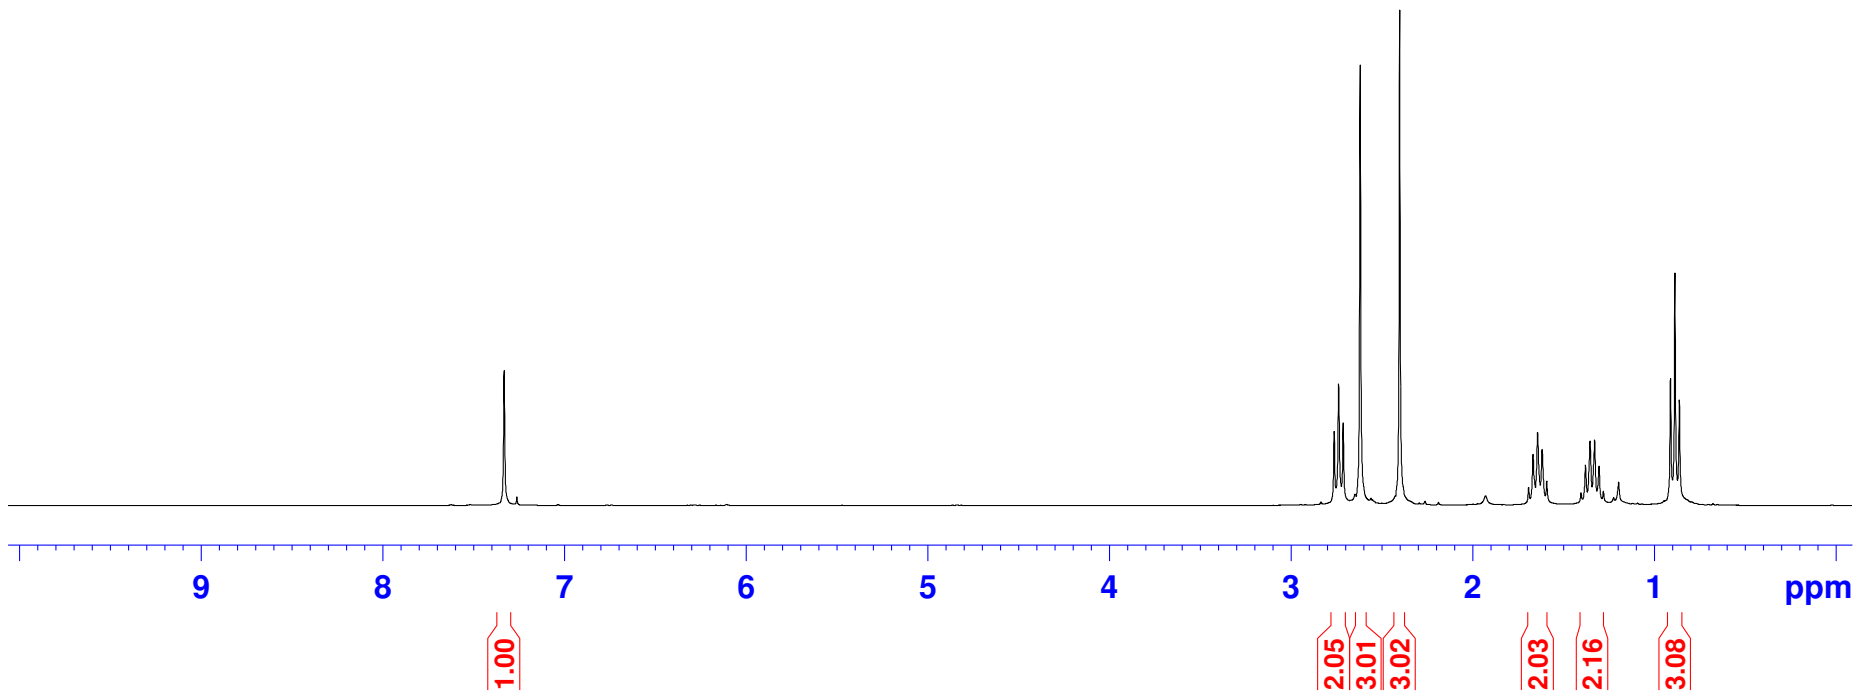

— 193.20  
— 189.20

— 161.99

— 150.02

— 123.01

— 116.85

77.43  
77.00  
76.58

— 37.96

— 28.88

— 26.24

— 22.26

— 14.68

— 13.70

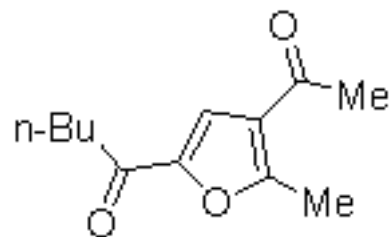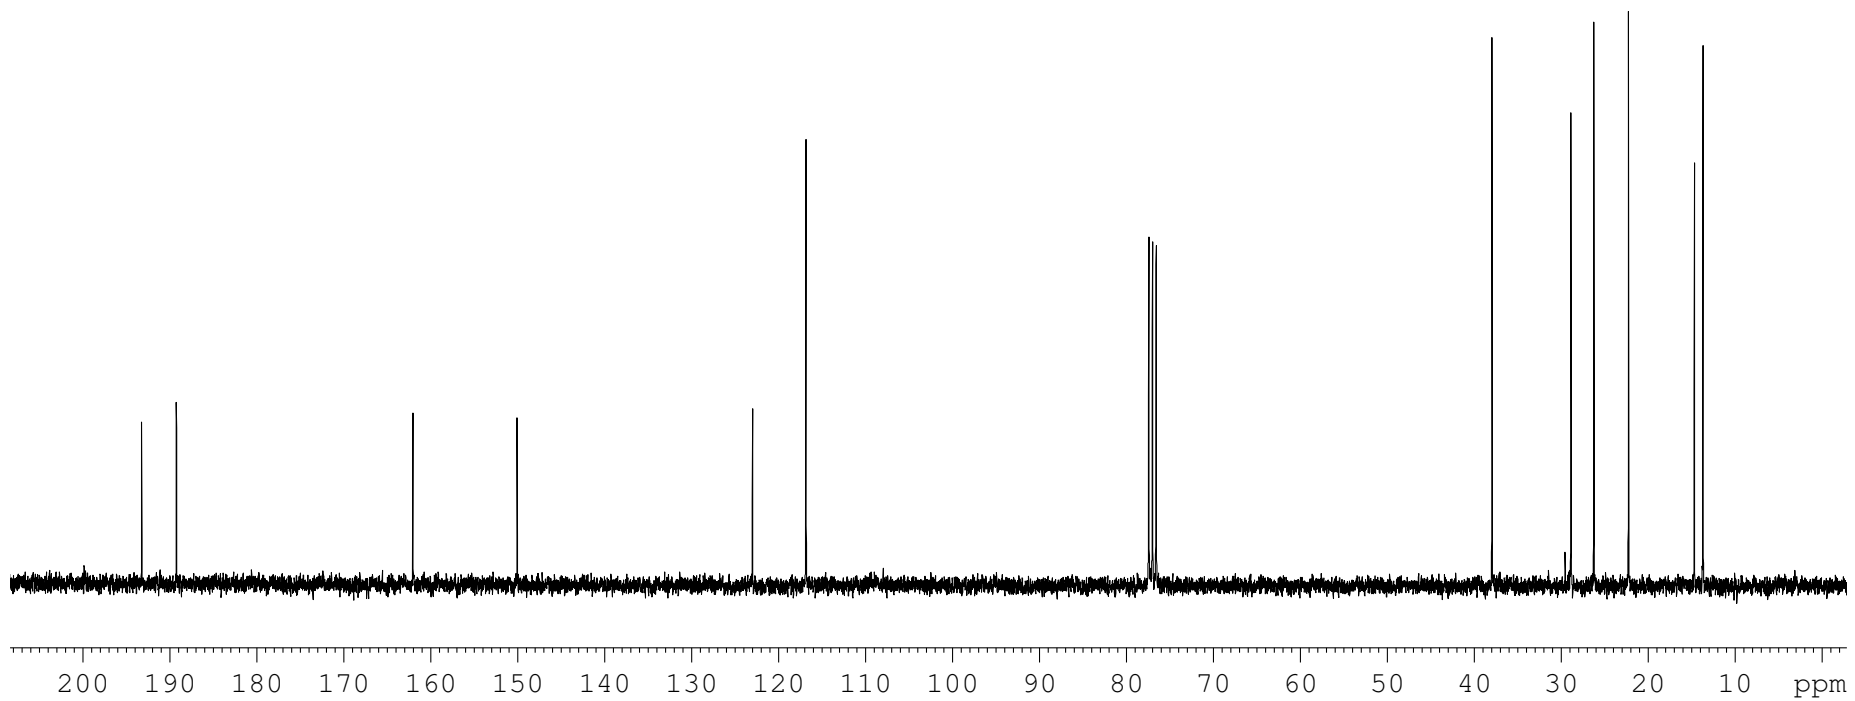

7.915  
7.891  
7.887  
7.587  
7.562  
7.538  
7.487  
7.461  
7.437  
7.389  
7.260

3.144  
3.119  
3.094  
3.069  
2.797  
2.772  
2.748  
2.724

1.316  
1.291  
1.266  
1.153  
1.129  
1.104

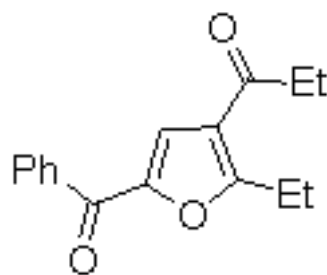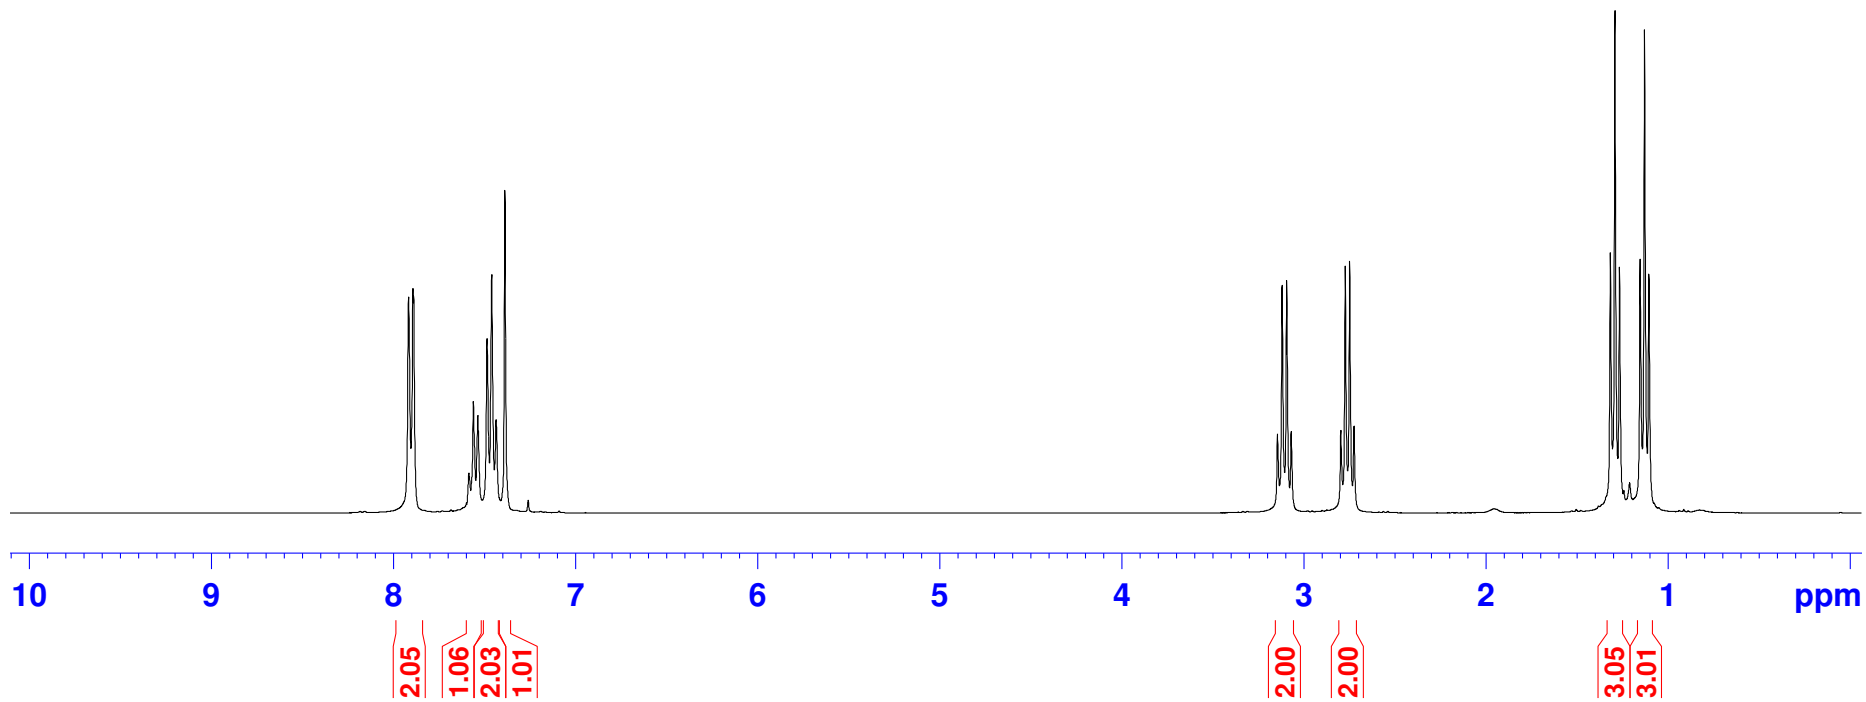

196.03  
181.91  
167.58  
149.49  
136.84  
132.60  
129.01  
128.38  
121.72  
120.15  
77.43  
77.00  
76.58  
34.28  
22.01  
11.55  
7.52

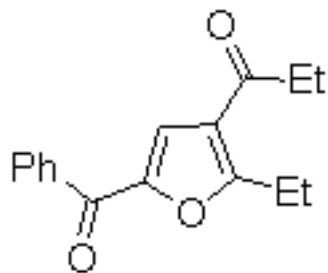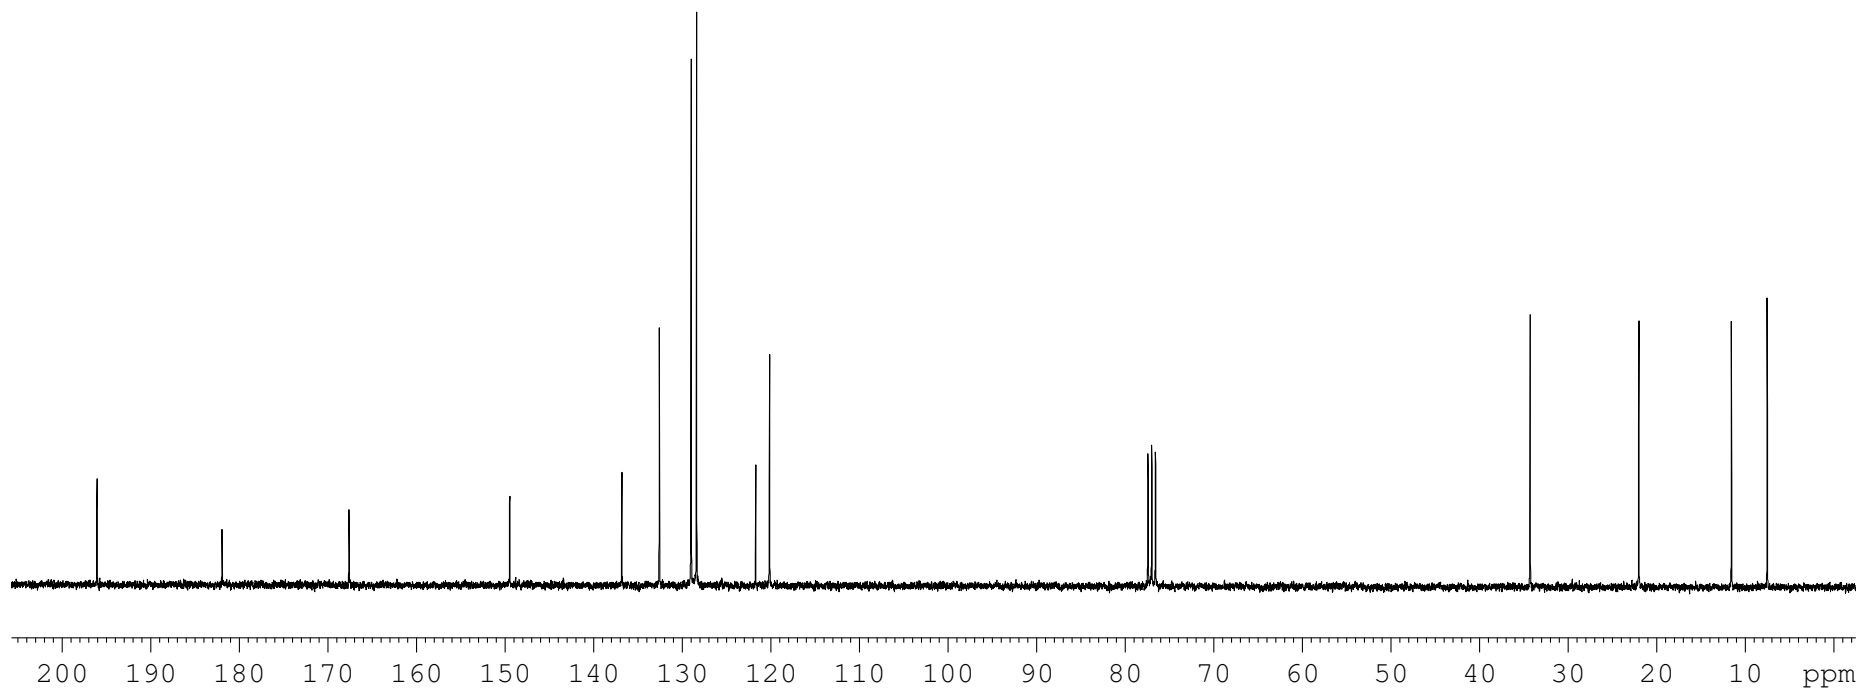

8.047  
8.022  
7.873  
7.845  
7.811  
7.653  
7.629  
7.605  
7.584  
7.557  
7.532  
7.507  
7.459  
7.446  
7.421  
7.395  
7.380  
7.366  
7.349  
7.340  
7.260

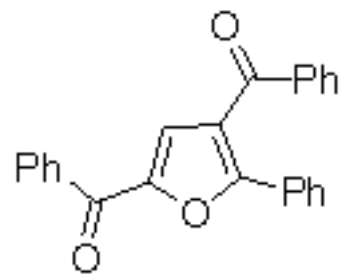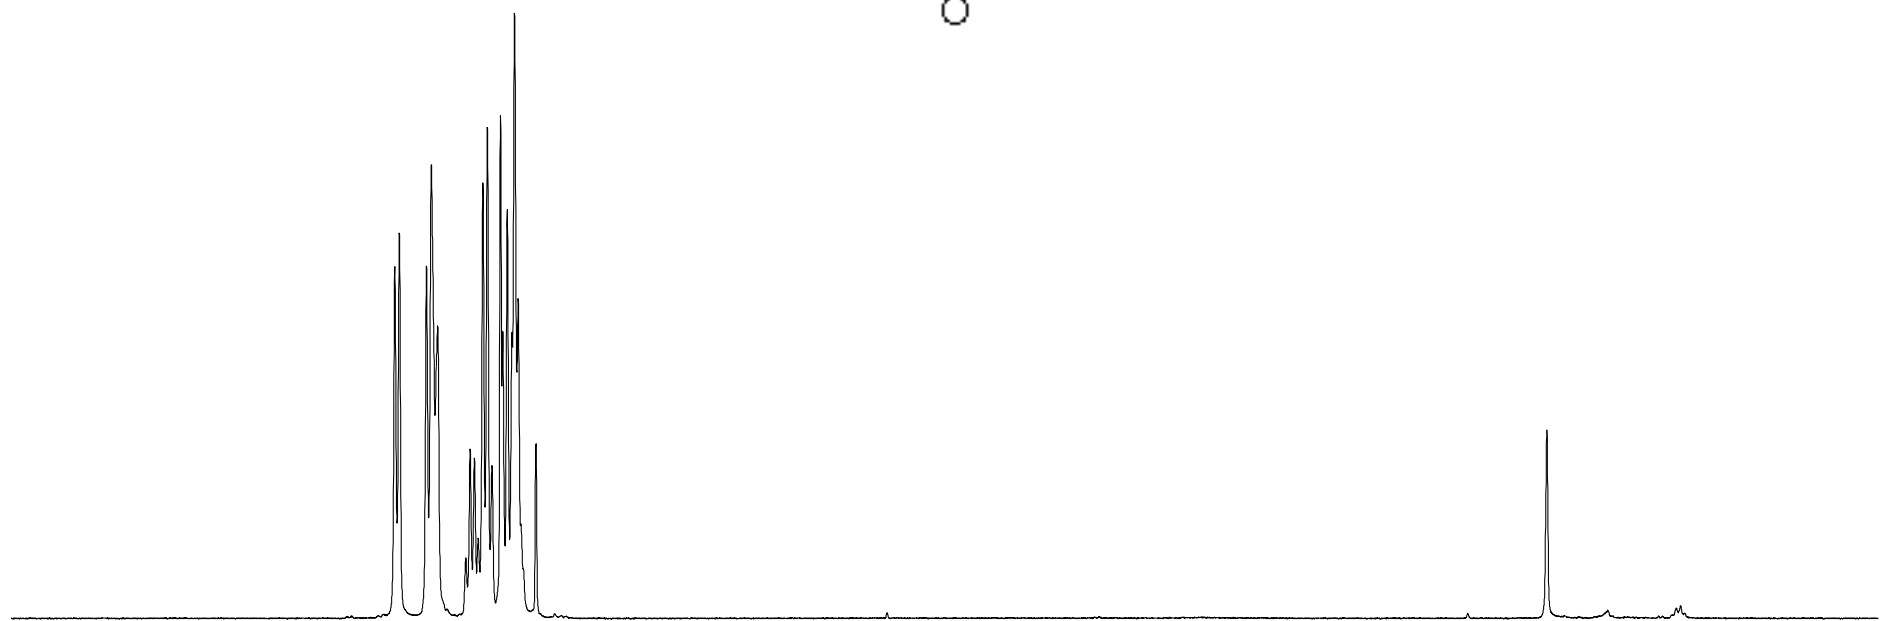

10 9 8 7 6 5 4 3 2 1 ppm

2.00  
4.02  
1.02  
3.15  
6.05

190.71

182.08

158.82

149.91

137.18

136.89

133.42

132.85

130.37

129.69

129.24

128.51

128.41

128.01

123.05

122.54

77.42

77.00

76.57

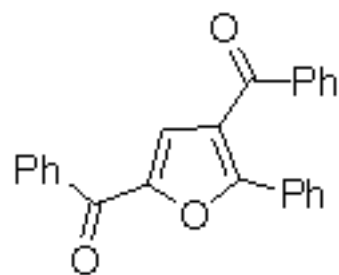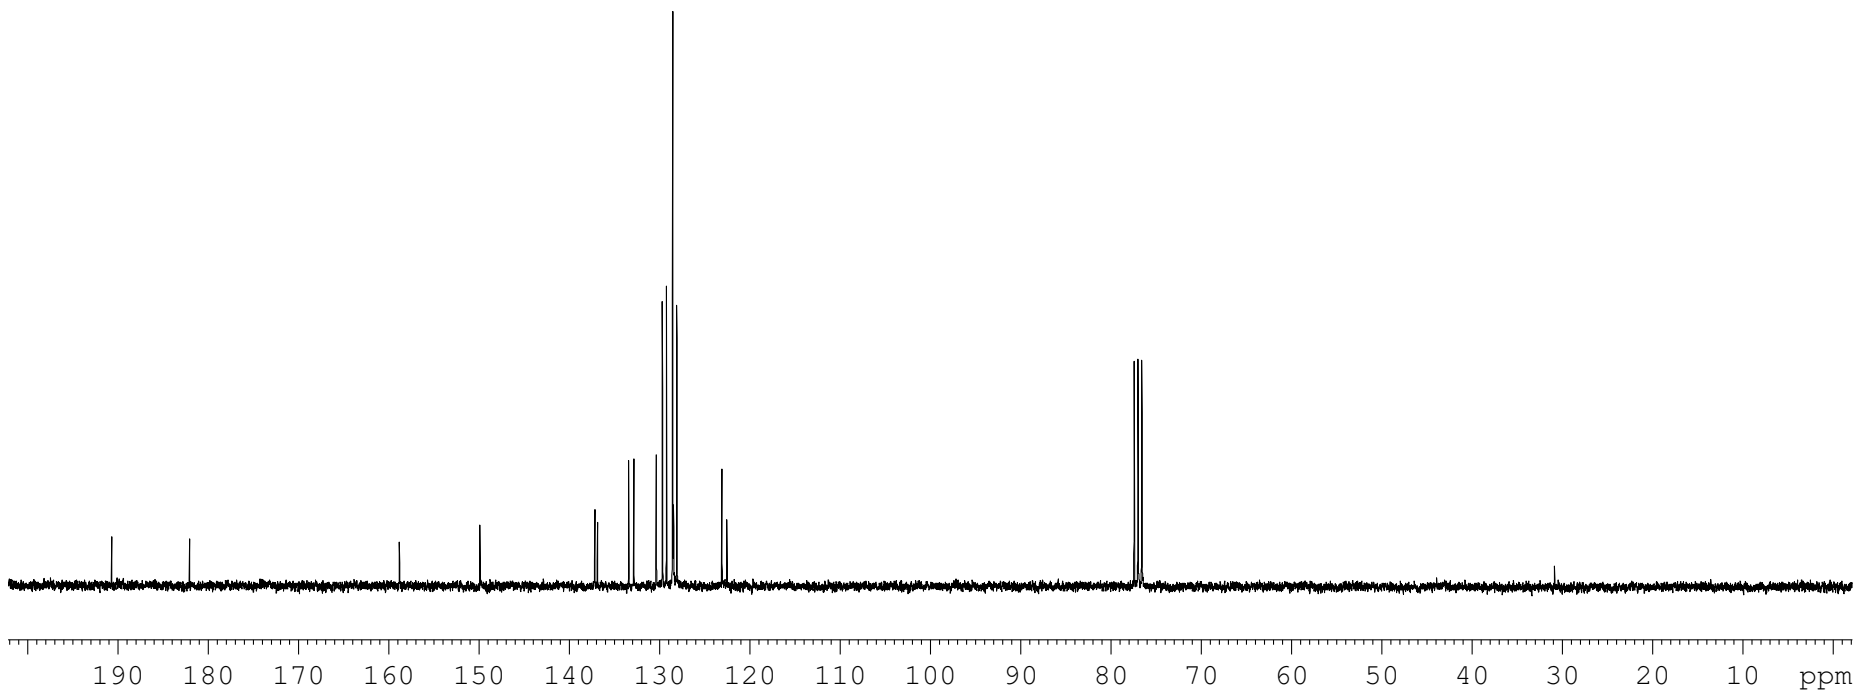

8.029  
8.016  
8.000  
7.986  
7.653  
7.629  
7.604  
7.582  
7.554  
7.529  
7.500  
7.493  
7.482  
7.260

2.475

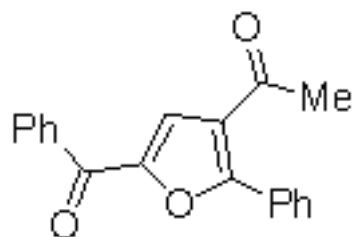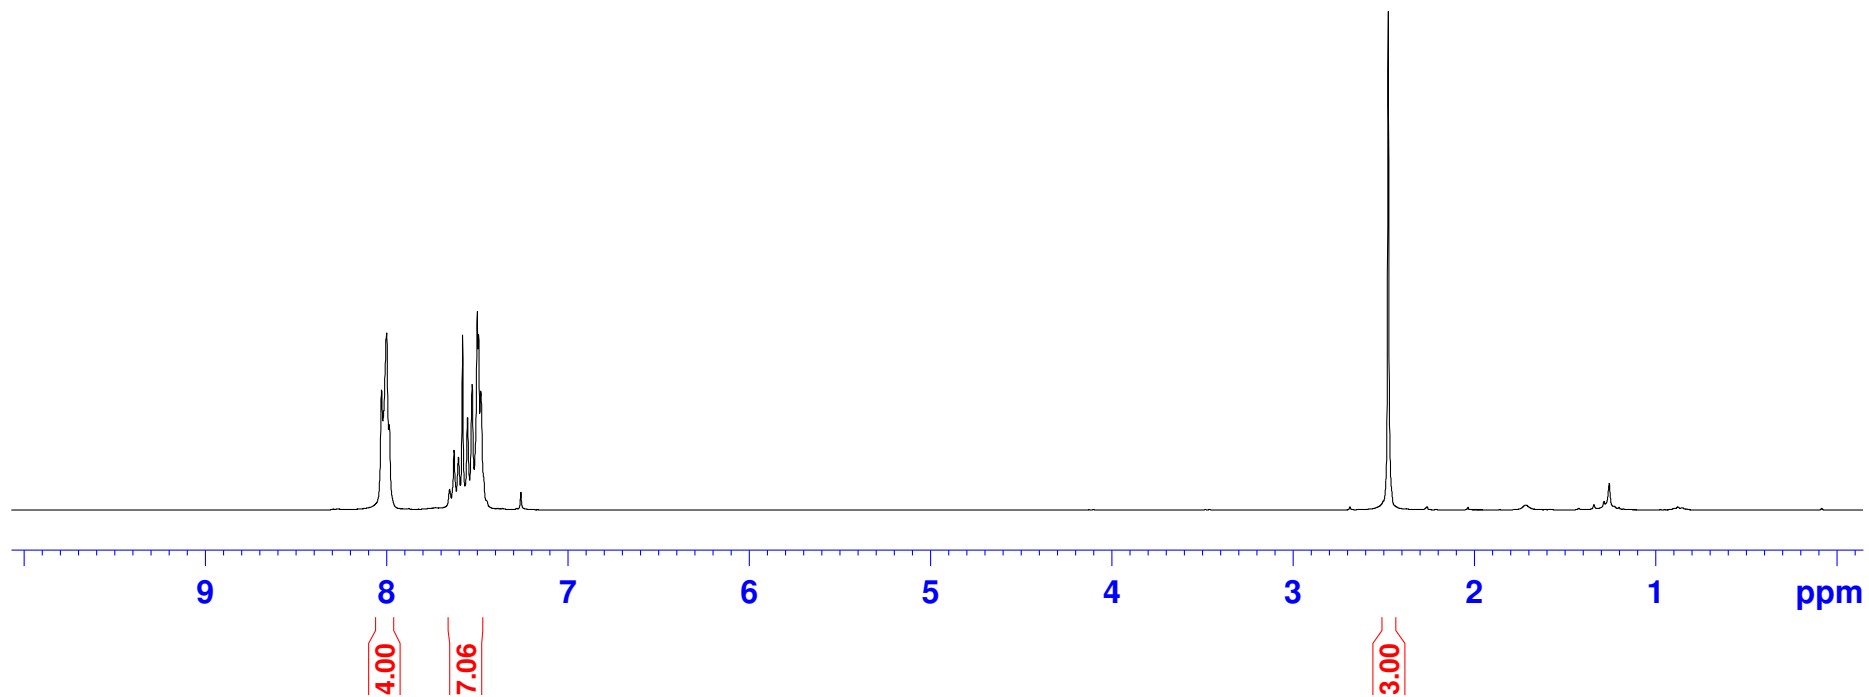

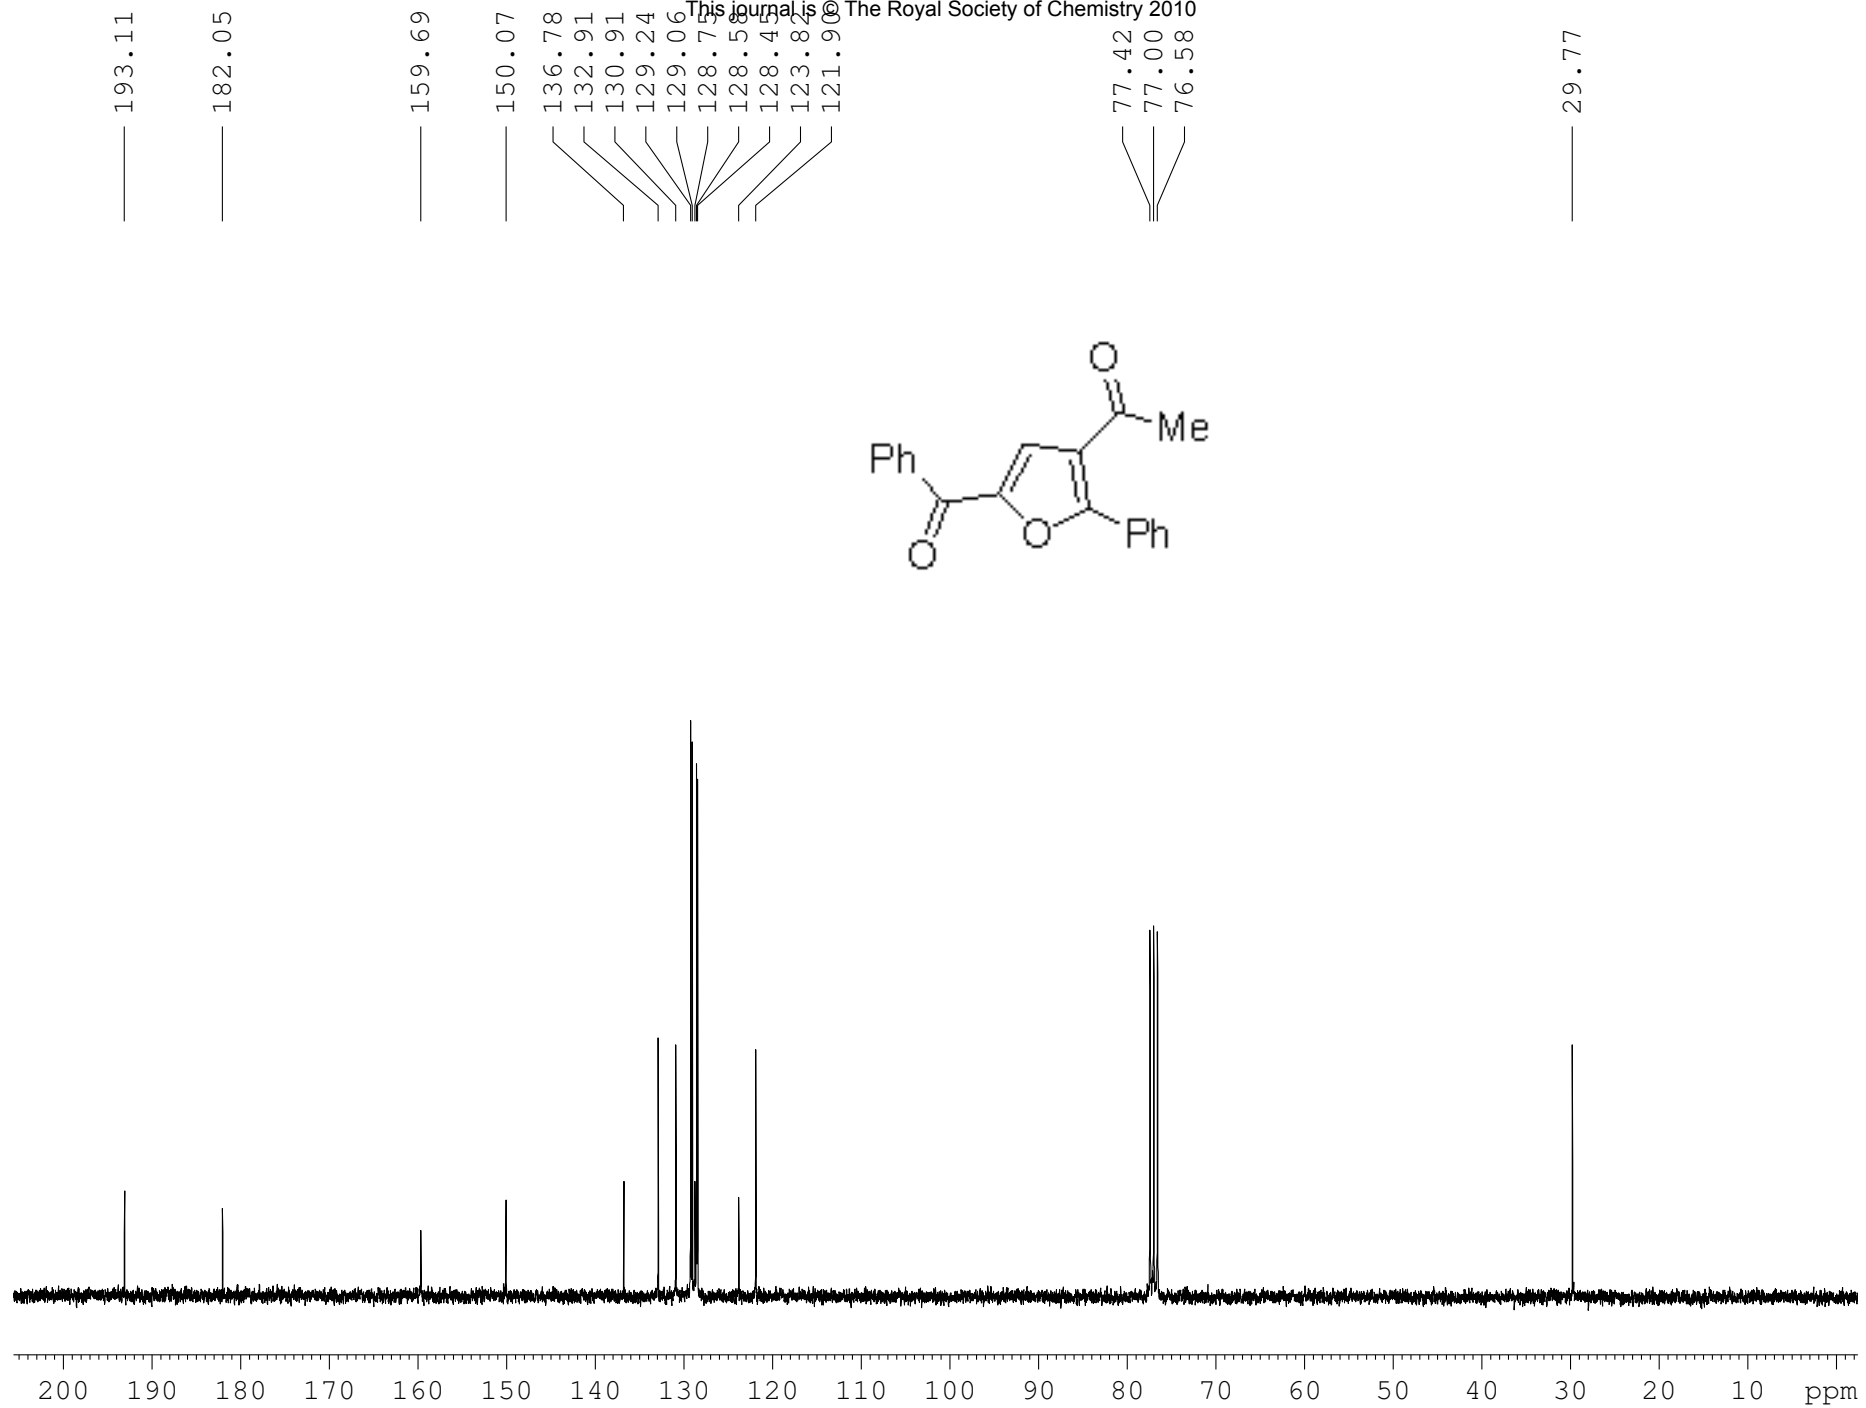



7.937  
7.913  
7.793  
7.769  
7.591  
7.567  
7.546  
7.543  
7.491  
7.467  
7.441  
7.335  
7.260

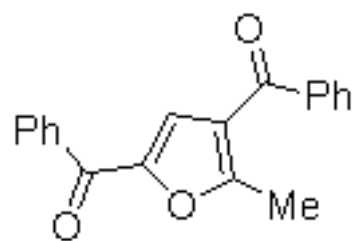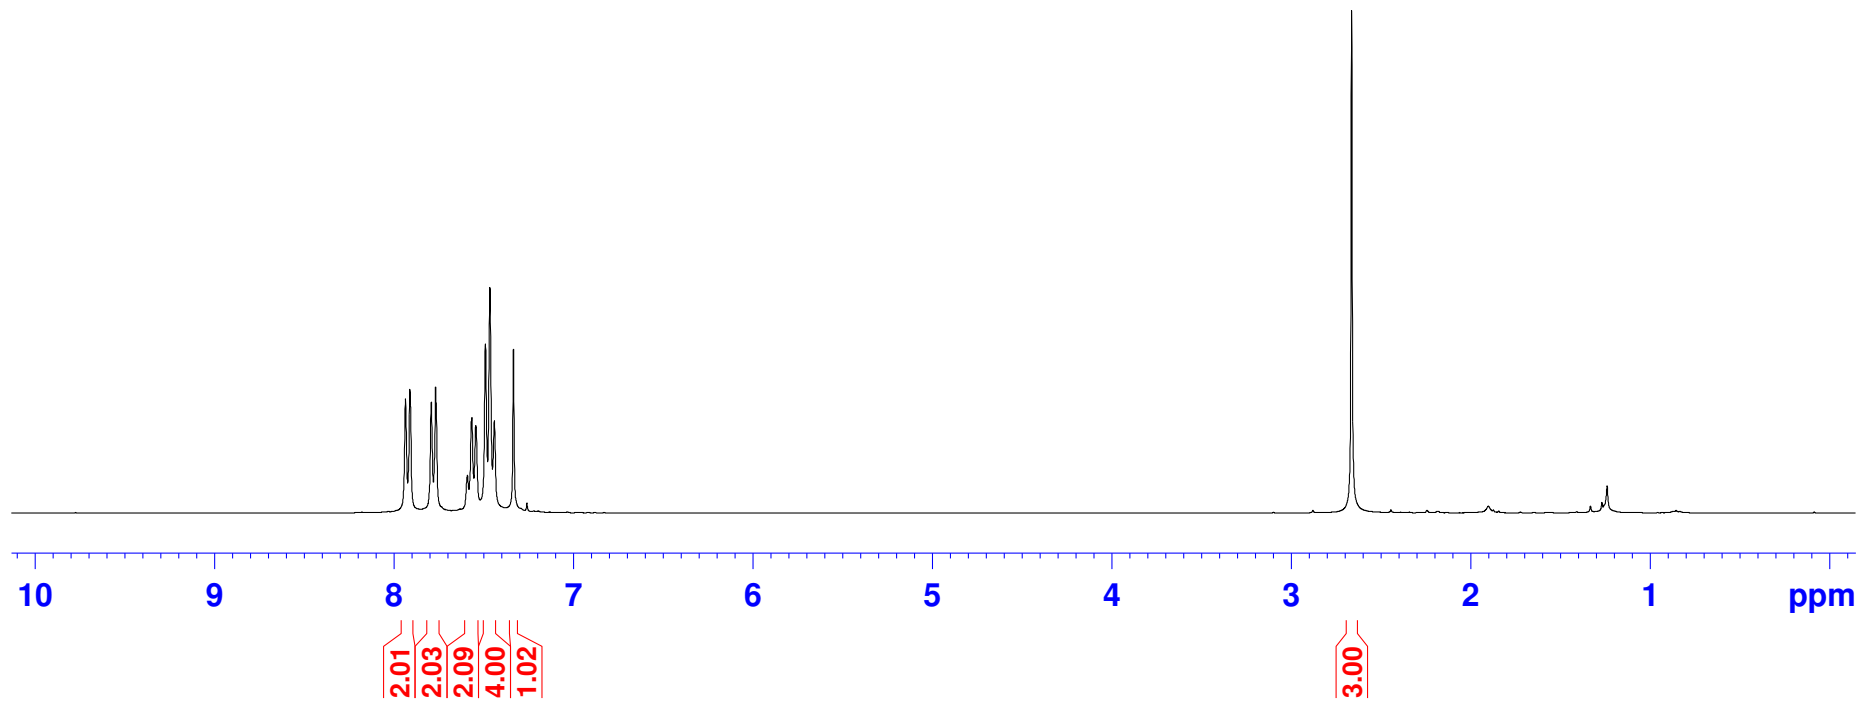

— 190.03

— 182.01

— 163.73

— 149.35

— 138.05

— 136.78

— 132.69

— 129.03

— 128.86

— 128.51

— 128.44

— 122.36

— 121.71

— 77.42

— 77.00

— 76.58

— 14.62

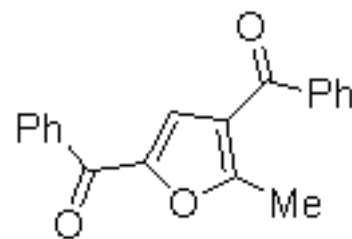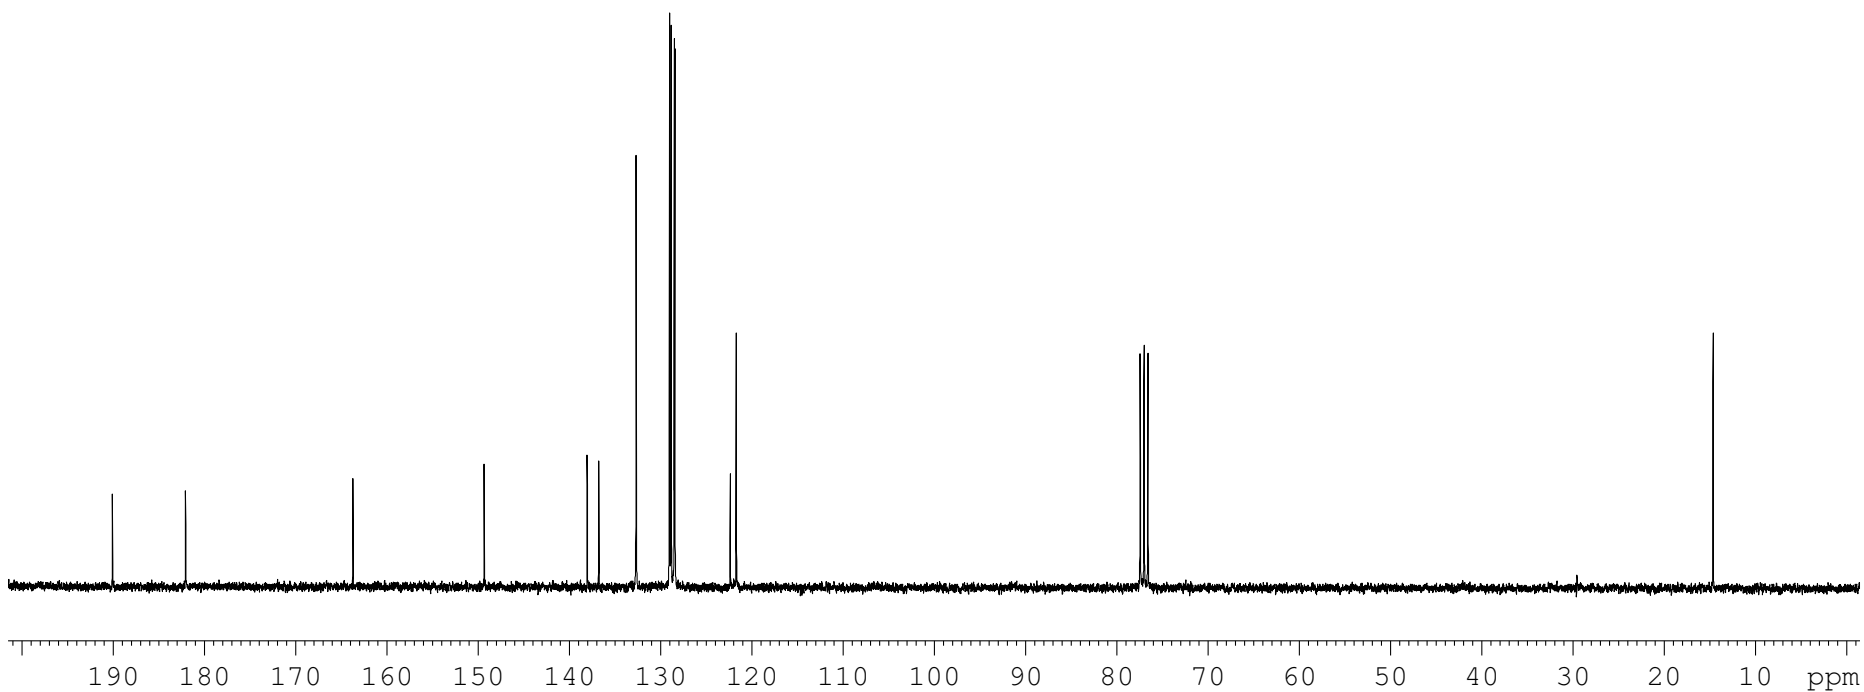

7.795  
7.770  
7.487  
7.463  
7.453  
7.442  
7.386  
7.363  
7.340  
7.336  
7.260

3.717  
2.589

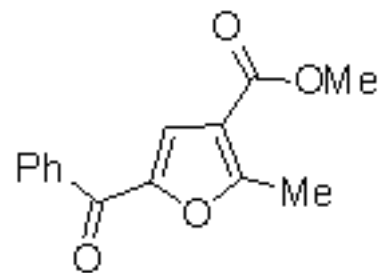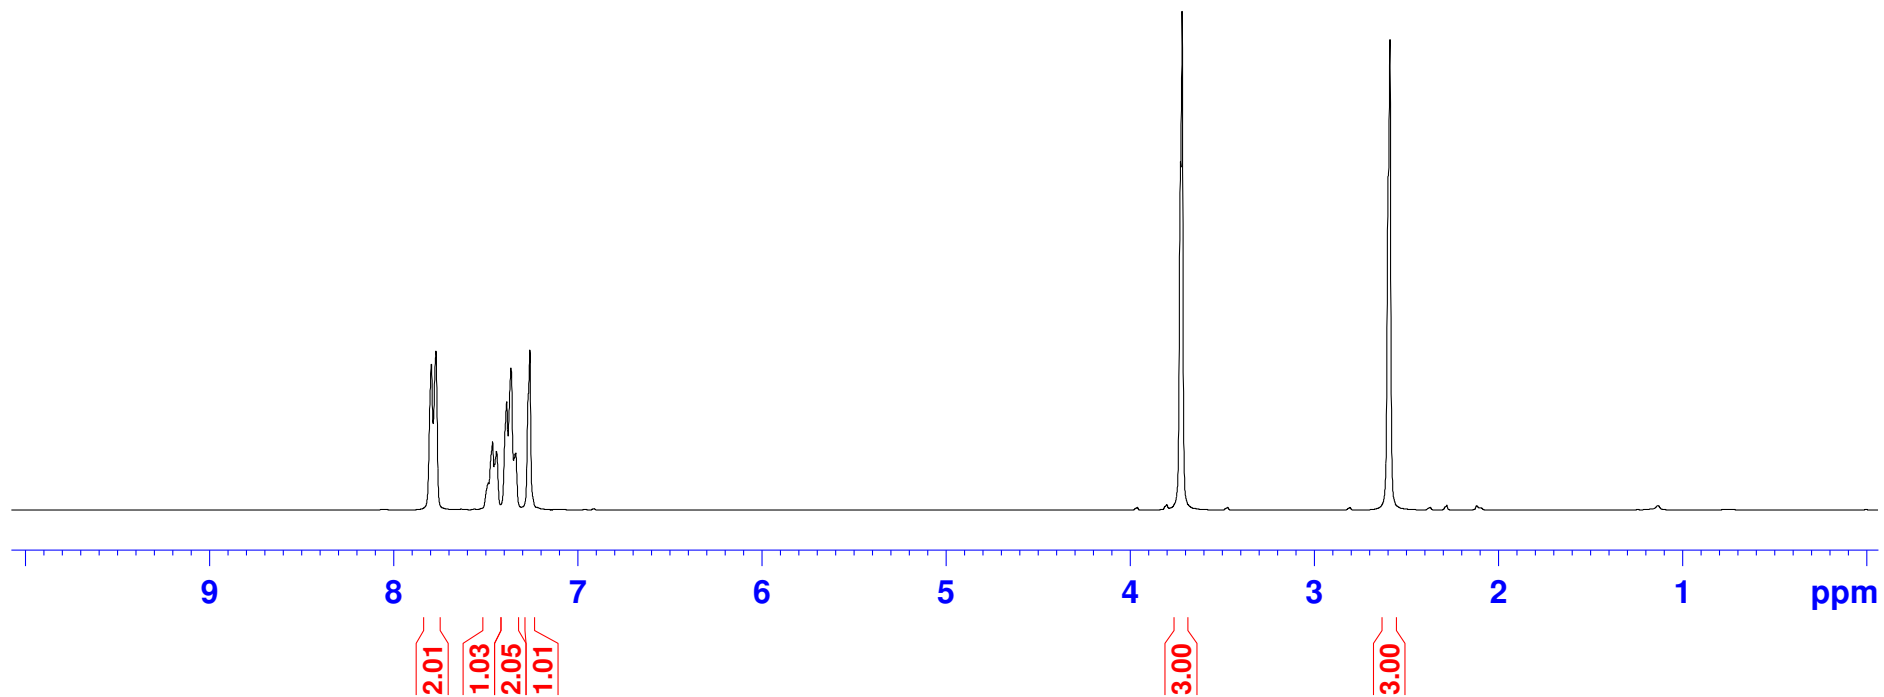

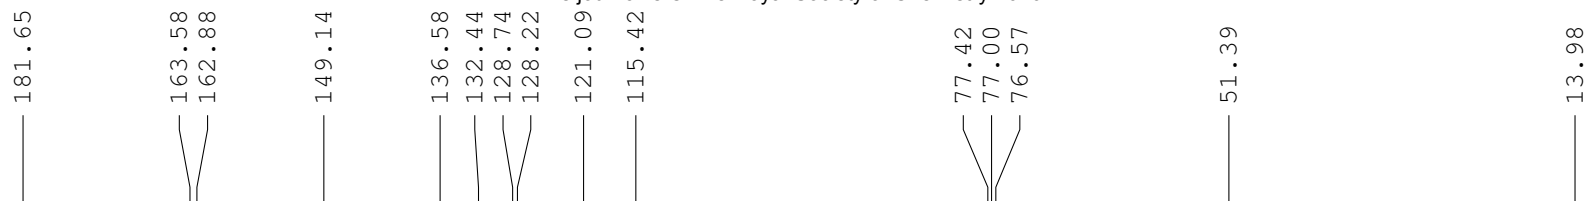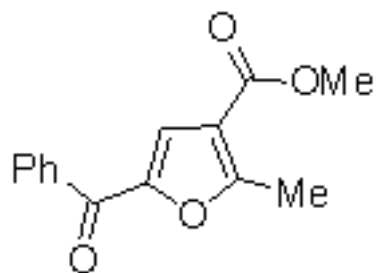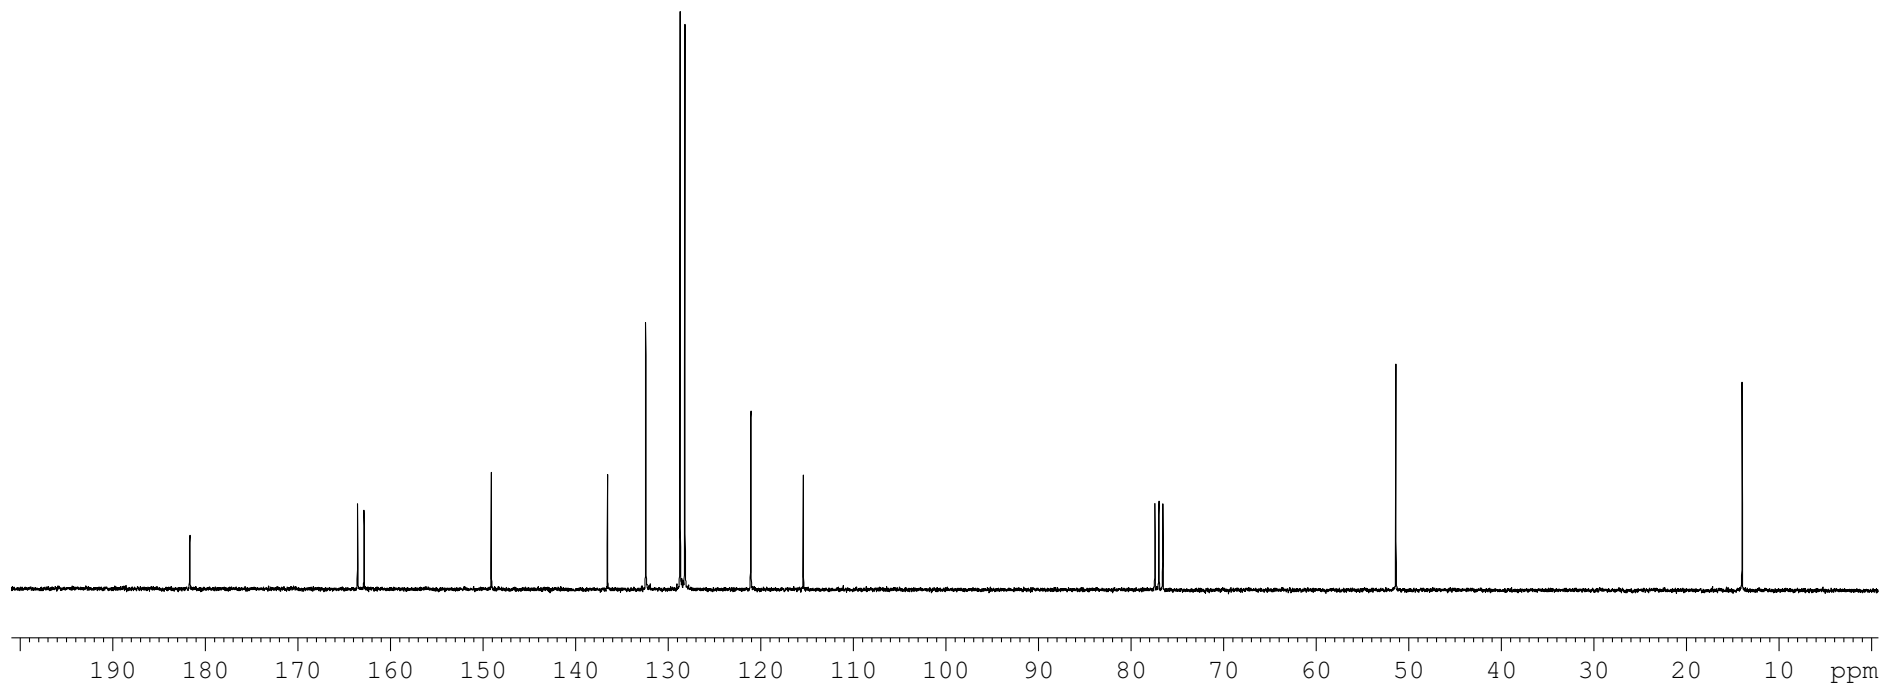

8.123  
8.113  
8.105  
8.021  
7.996  
7.660  
7.636  
7.616  
7.563  
7.539  
7.511  
7.494  
7.487  
7.479  
7.260

4.371  
4.355  
4.322  
4.300

1.596  
1.376  
1.353  
1.329

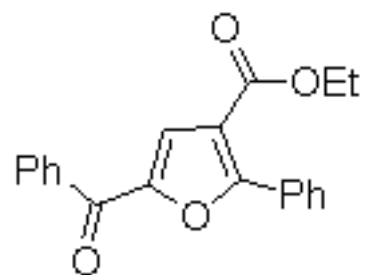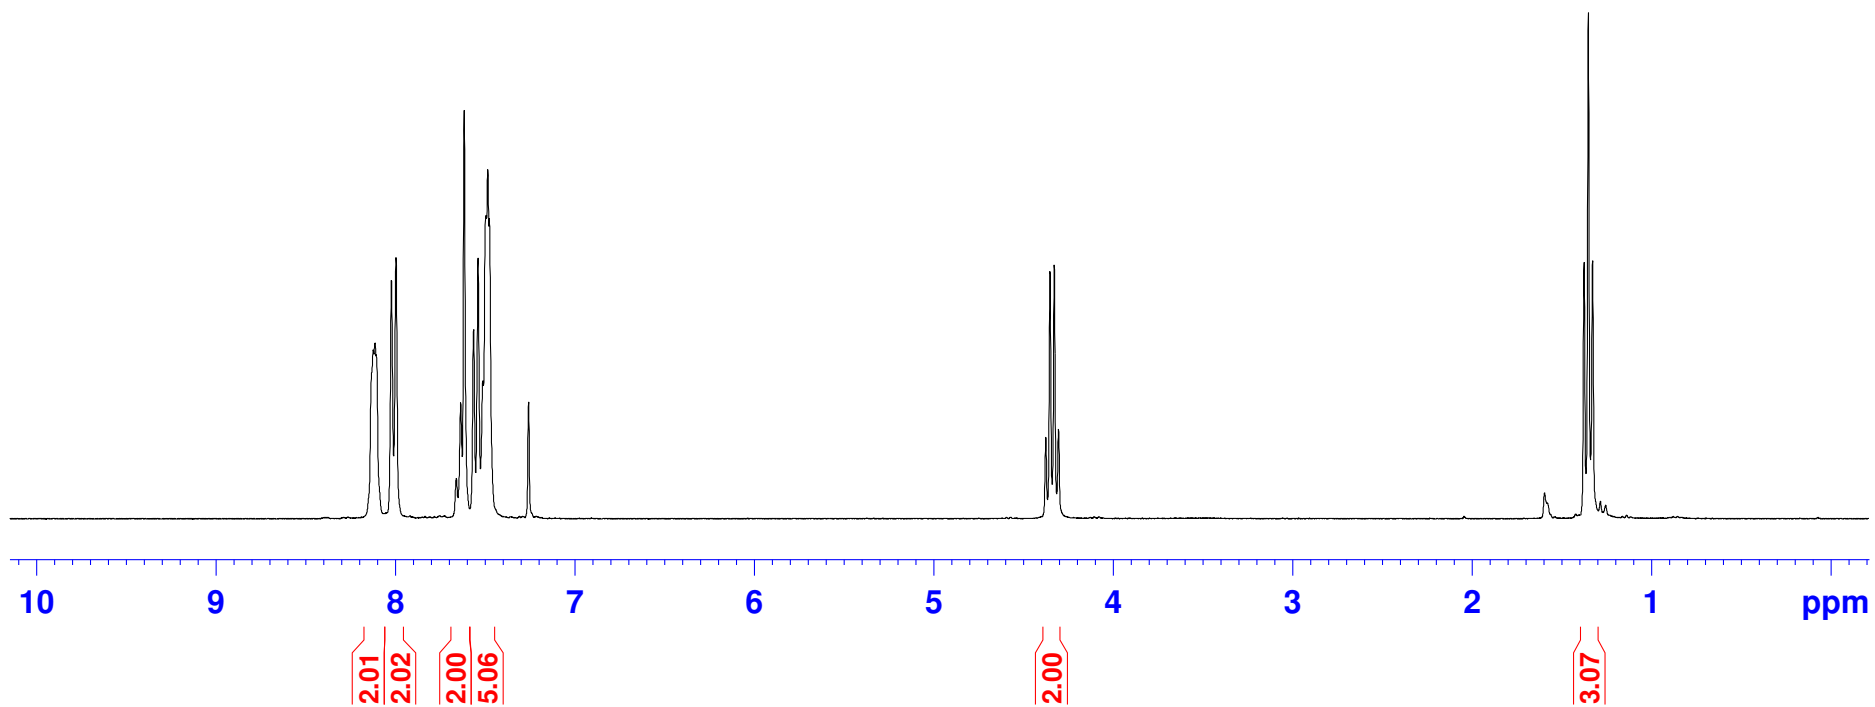

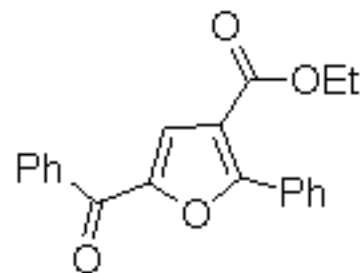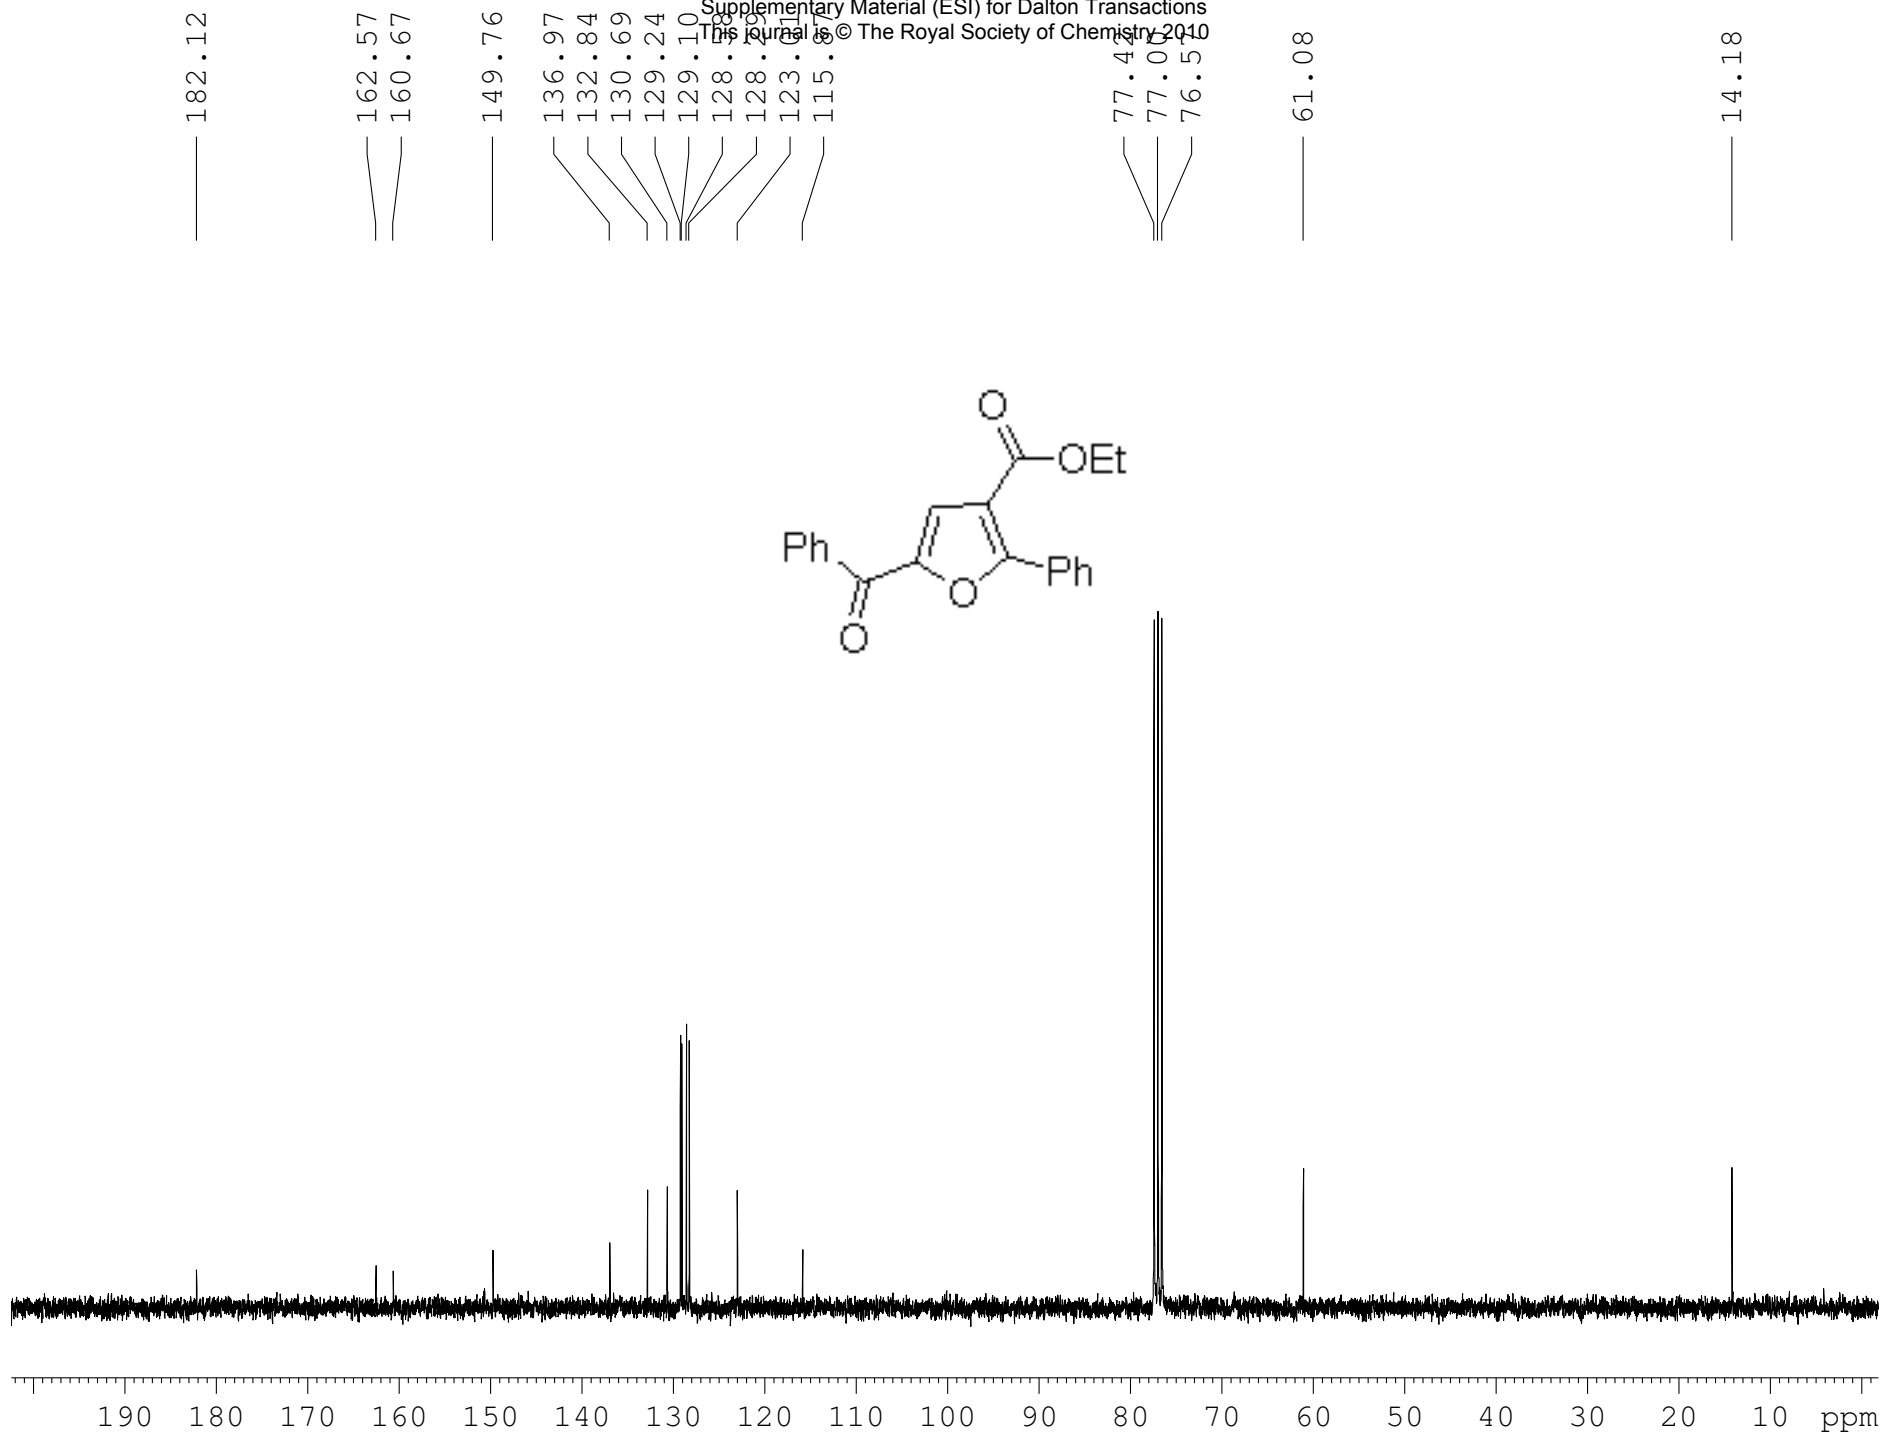

7.988  
7.975  
7.970  
7.961  
7.951  
7.803  
7.778  
7.629  
7.616  
7.584  
7.526  
7.500  
7.476  
7.461  
7.436  
7.412  
7.386  
7.361  
7.260

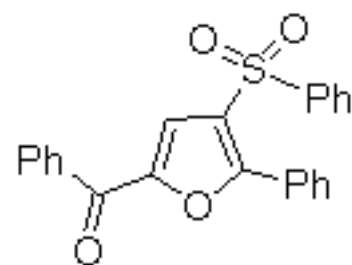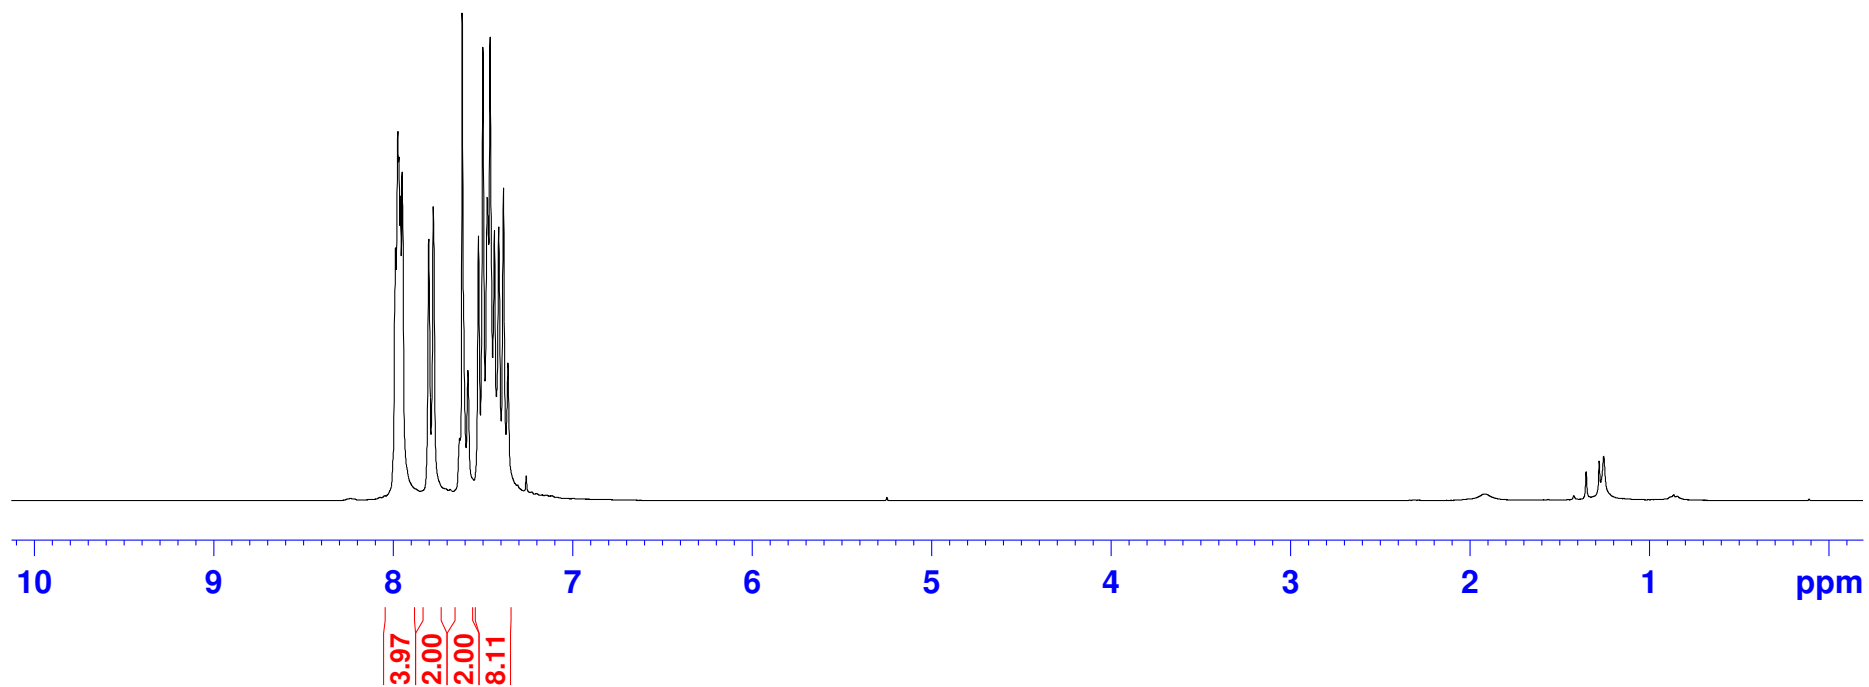

181.45

157.88

149.36

140.75

136.18

133.58

133.10

131.18

129.06

129.01

128.51

128.41

127.01

127.01

126.01

121.51

77.43

77.00

76.58

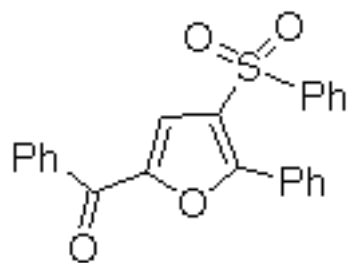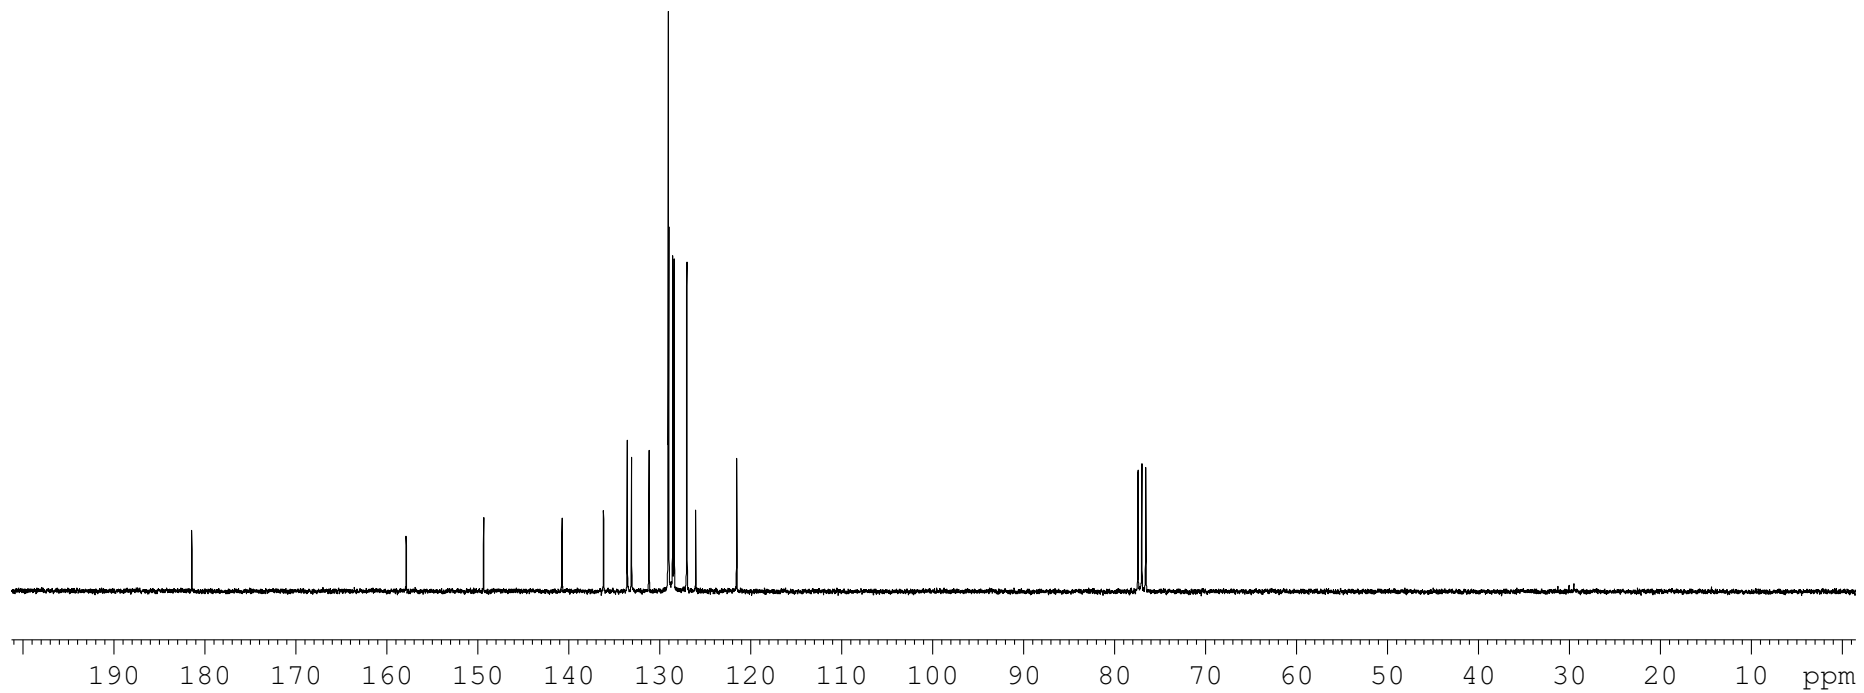



7.369  
7.357  
7.321  
7.304  
7.260

5.910

2.196

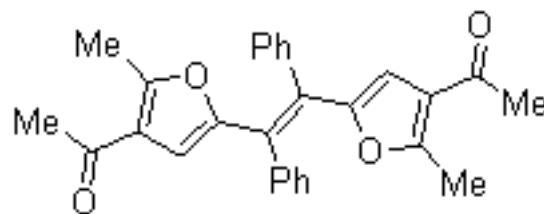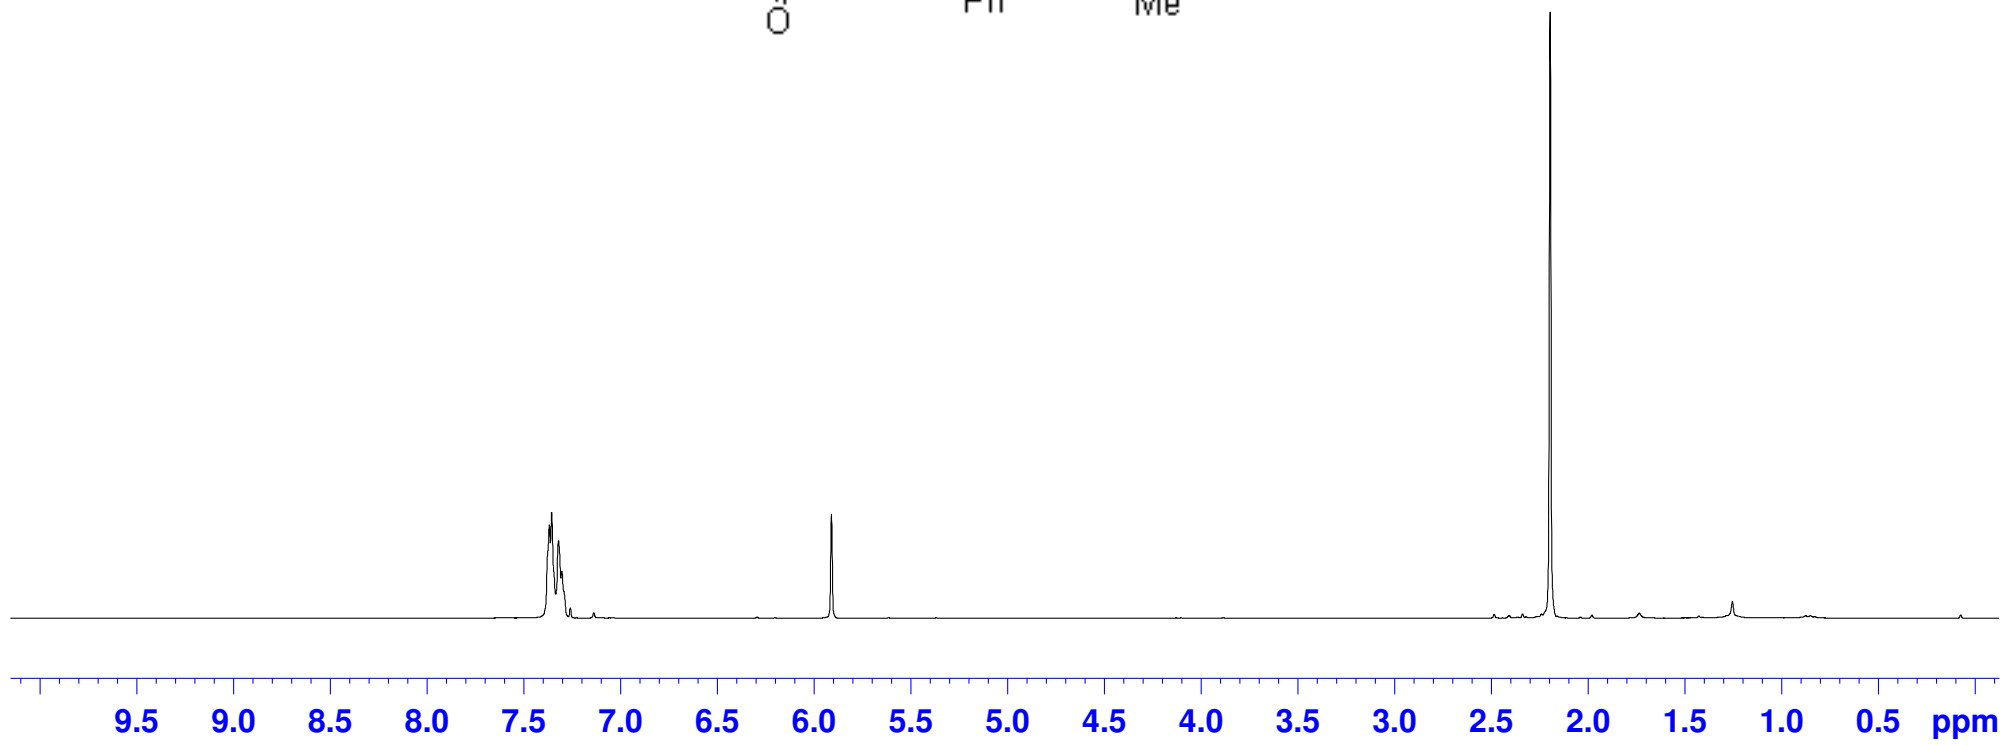

10.07

2.00

12.07

193.9

157.8

152.4

139.9

130.0

128.4

128.0

127.6

122.9

112.0

28.89

14.08

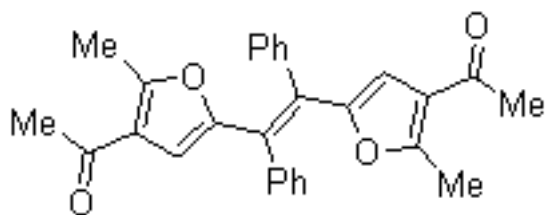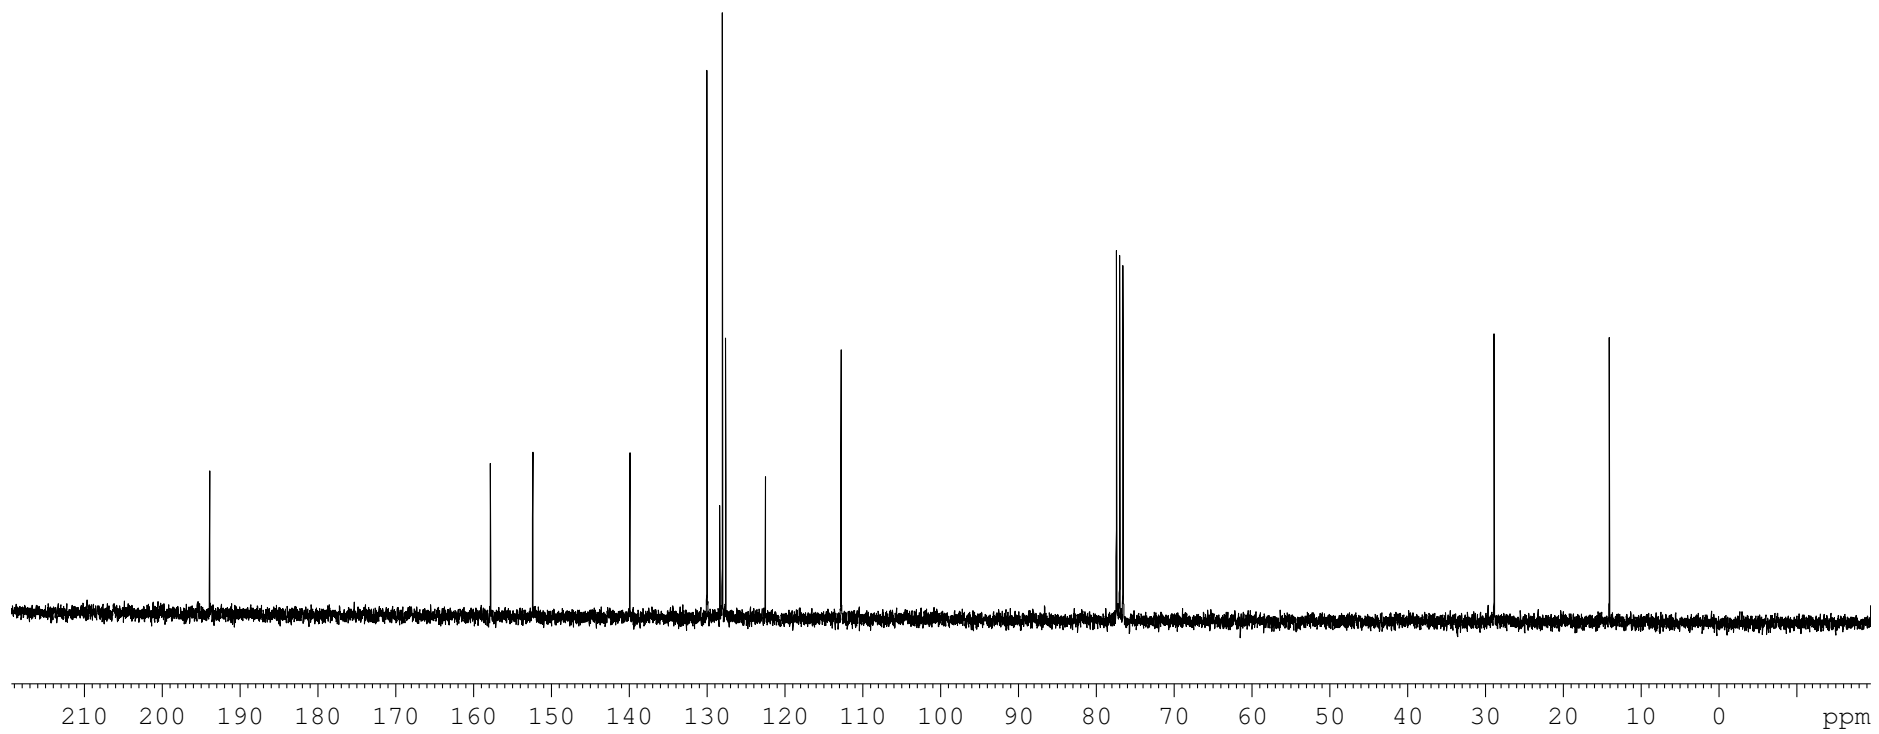

7.260  
7.141

6.291

2.484  
2.338

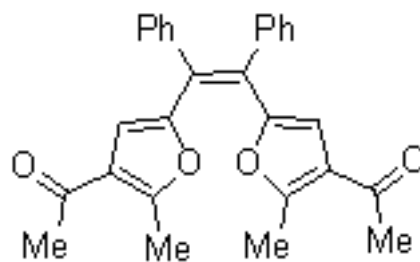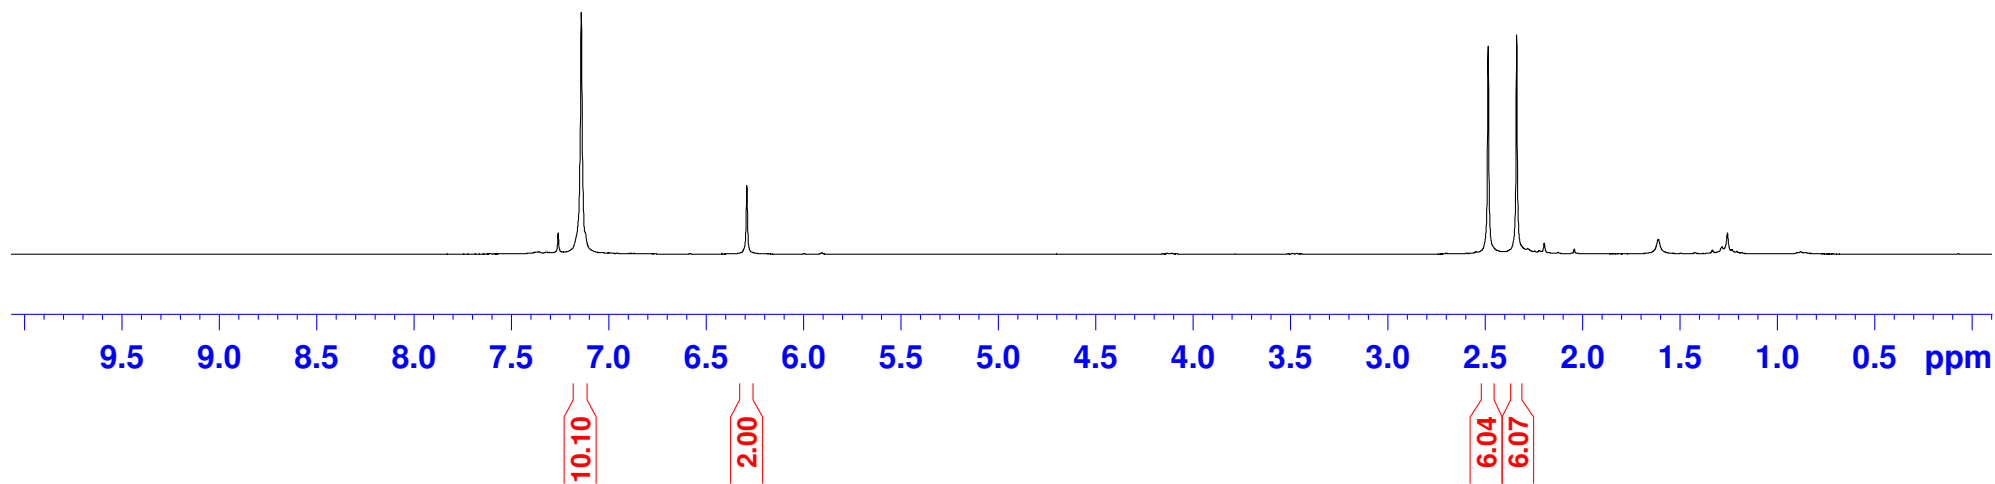

194.15

157.76  
153.24

139.62  
131.35  
129.36  
127.84  
127.11  
122.82

112.47

77.42  
77.00  
76.58

29.11

14.37

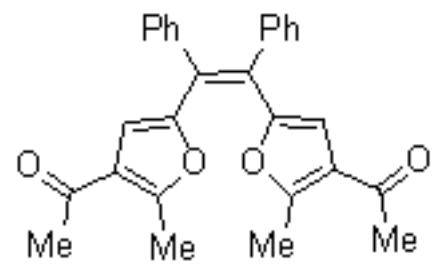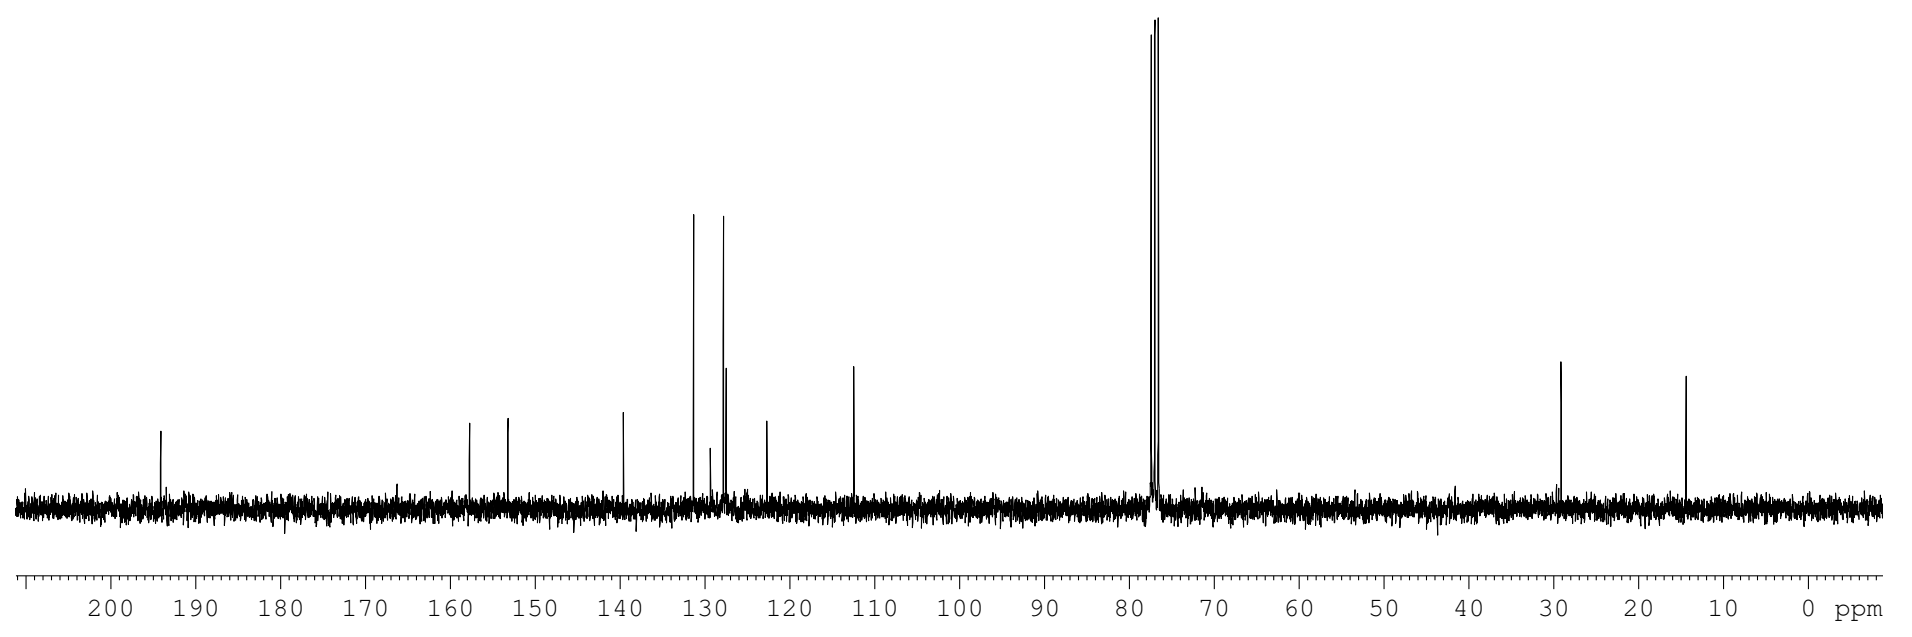

7.260  
7.180  
7.162  
7.143  
7.131  
7.118  
7.109  
7.095  
7.077  
7.054  
6.821  
6.815  
6.795  
5.904

2.973  
2.944  
2.919  
2.574  
2.289  
2.014  
1.996  
1.984  
1.966  
1.952  
1.930  
1.911

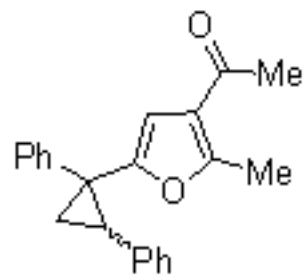

first fraction

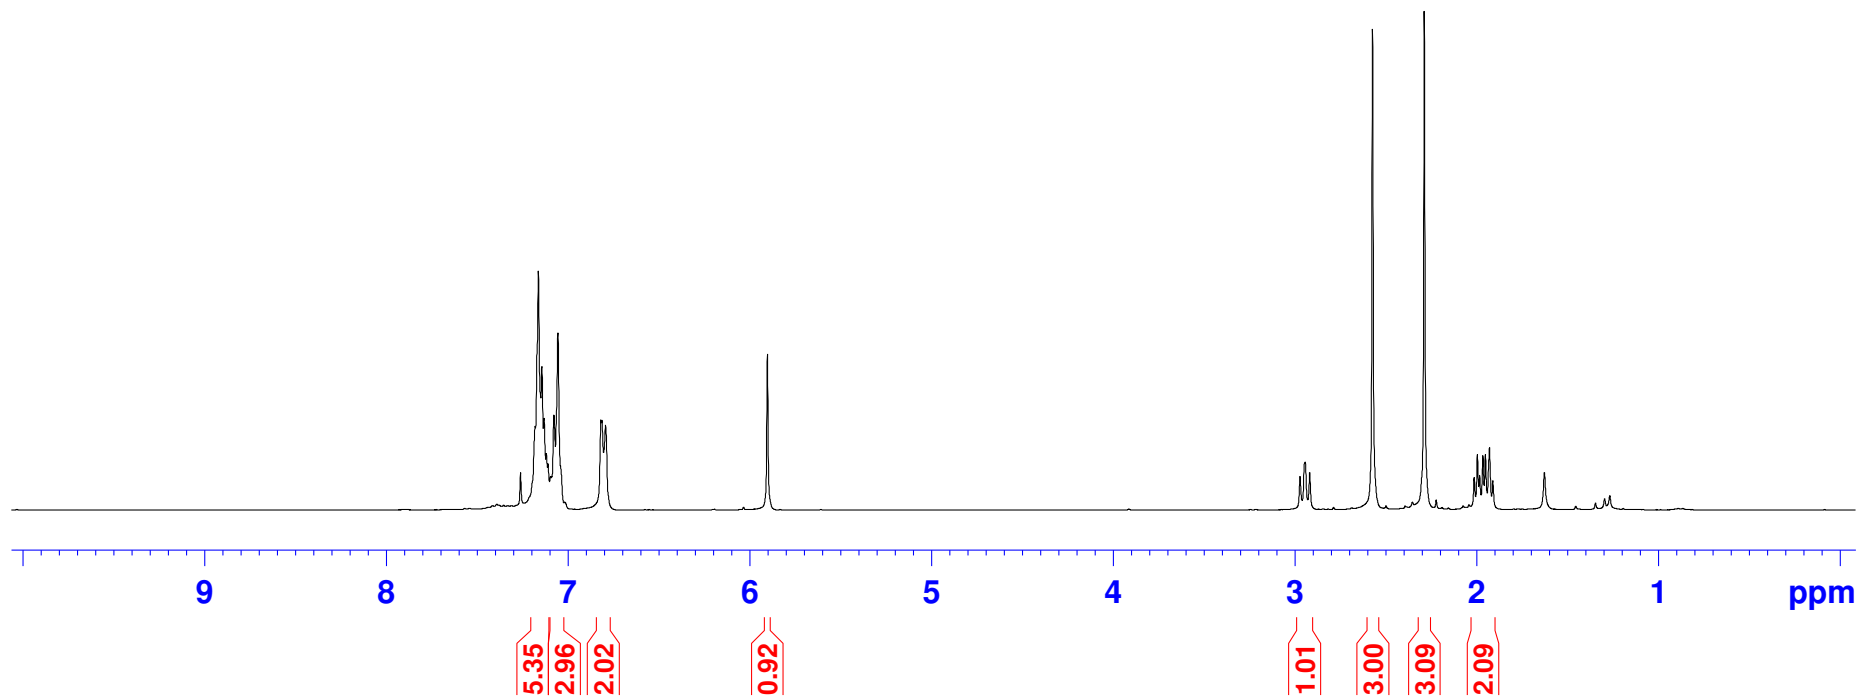

194.25

156.82  
156.58

137.41  
136.82  
131.37  
128.03  
127.73  
127.6  
127.0  
125.7  
122.2

105.7

77.42  
77.00  
76.58

33.51  
31.24  
29.05

19.00  
14.42

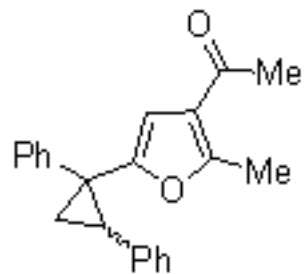

first fraction

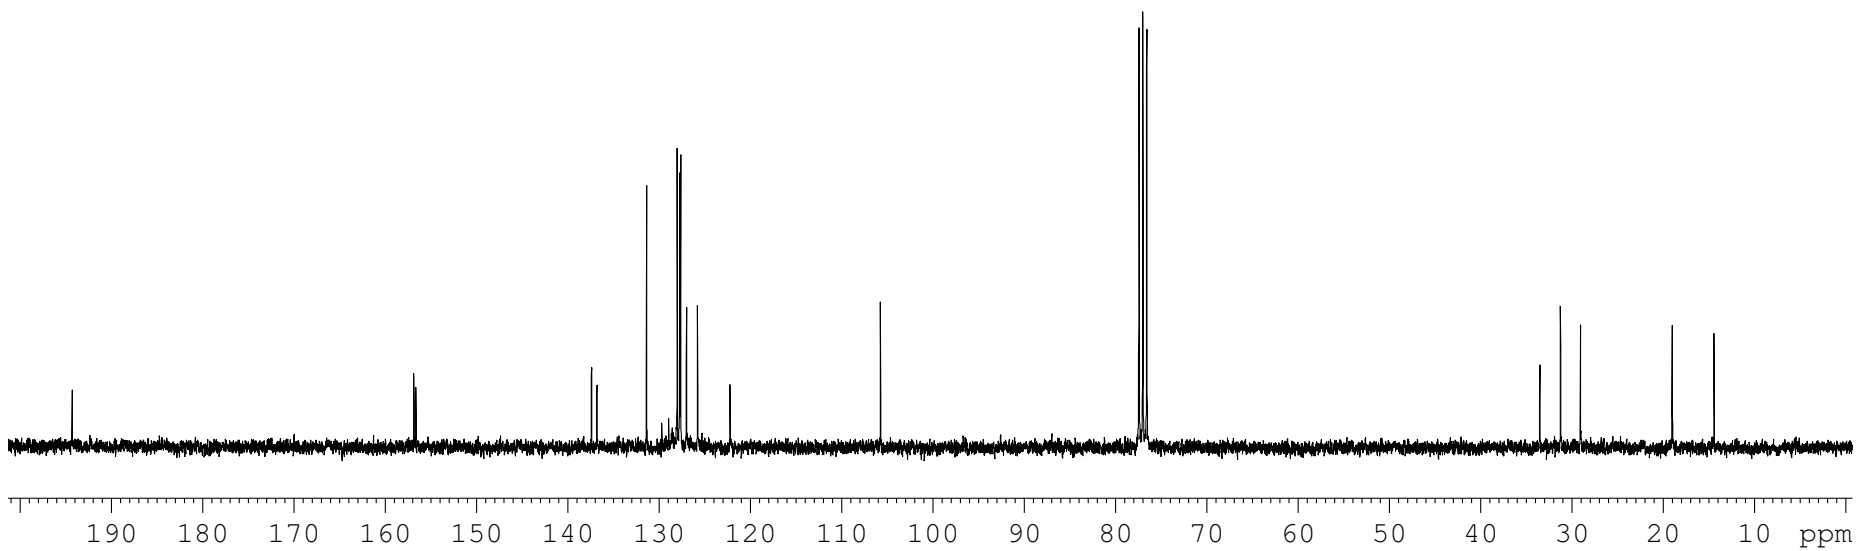

7.317  
7.293  
7.272  
7.248  
7.223  
7.180  
7.157  
7.132  
7.104  
7.081  
7.072  
7.052  
7.036  
7.023  
7.015  
5.942

2.772  
2.745  
2.720  
2.205  
2.118  
1.984  
1.965  
1.943  
1.693  
1.675  
1.664  
1.646

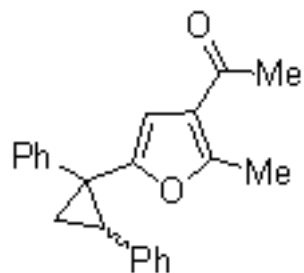

second fraction

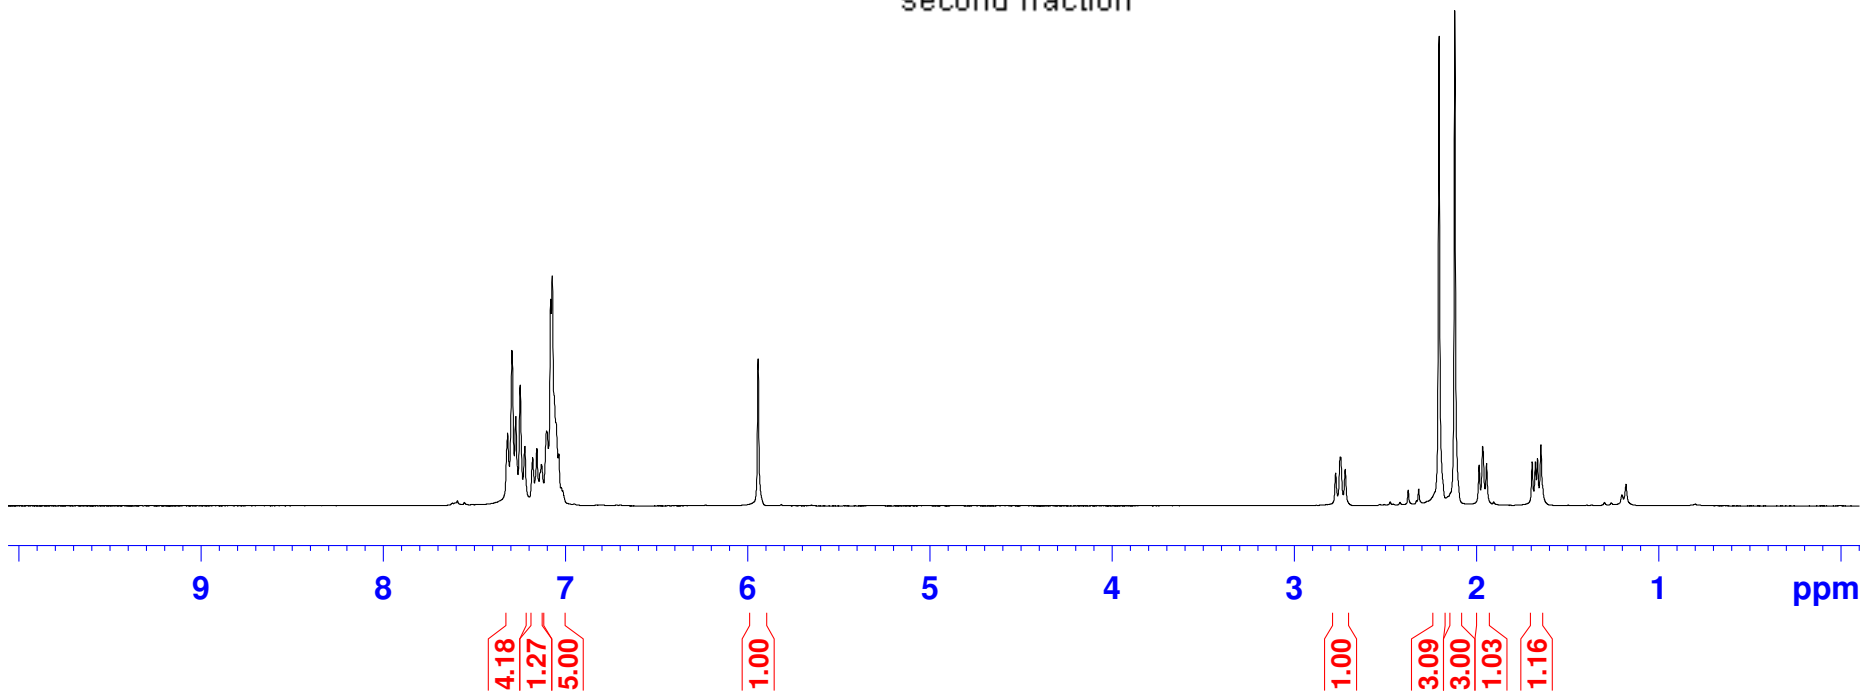

194.03

157.25

152.65

143.12

137.44

128.46

128.27

128.00

127.72

126.68

126.24

121.55

109.00

77.42

77.00

76.57

32.26

31.99

28.88

18.92

14.07

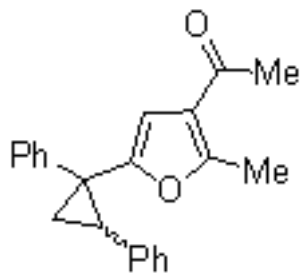

second fraction

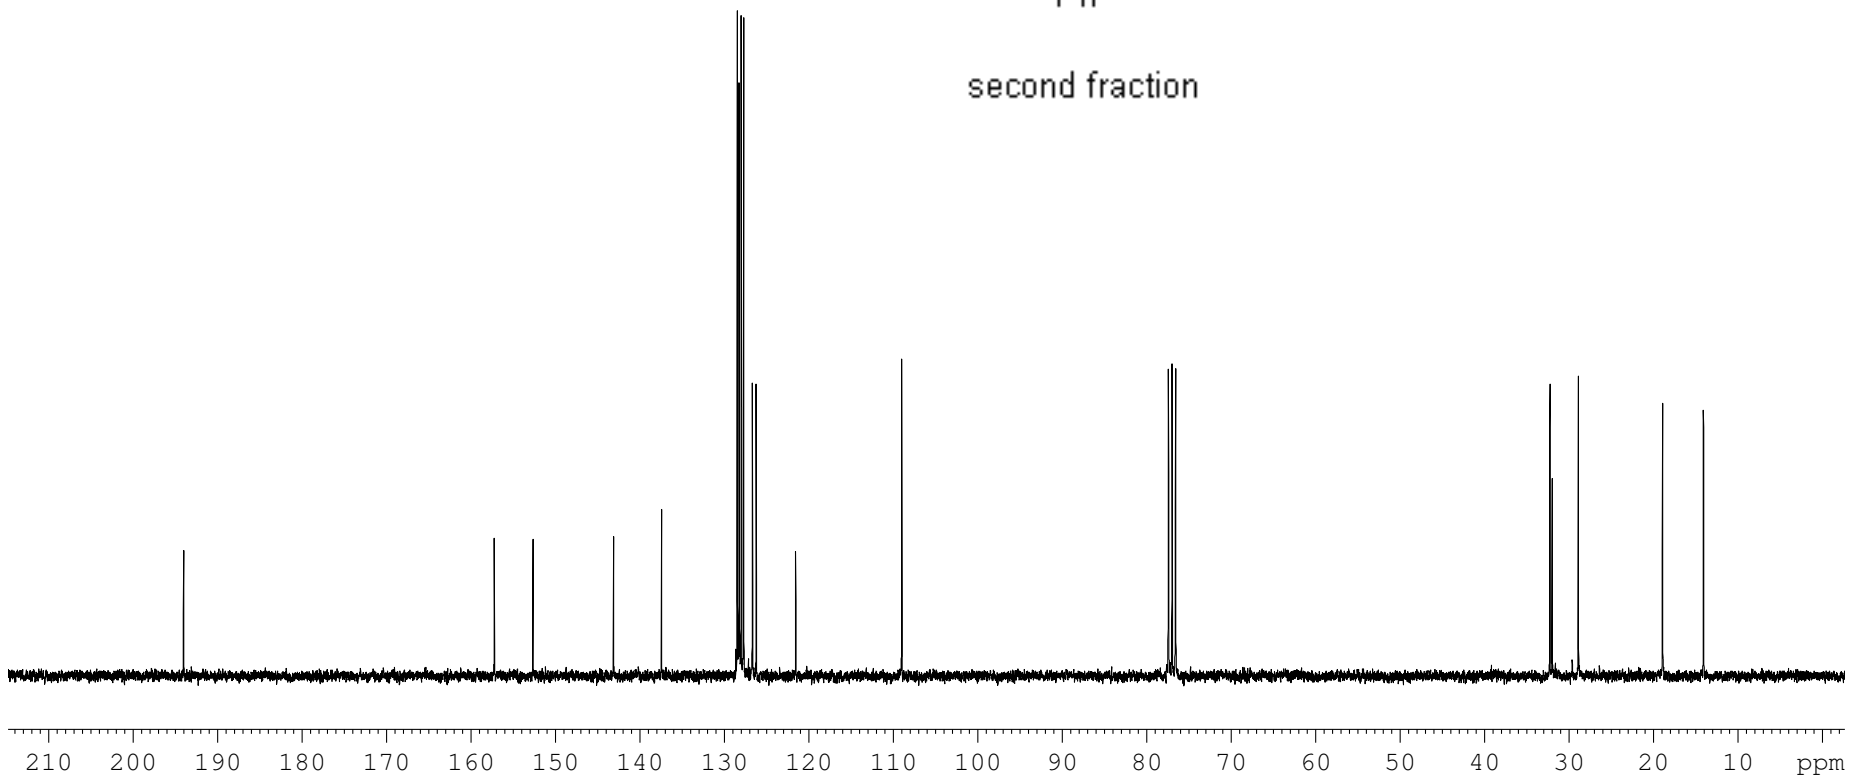



7.528  
7.522  
7.501  
7.420  
7.409  
7.392  
7.369  
7.354  
7.331  
7.260  
6.432  
6.426

2.625  
2.618

1.227

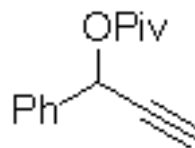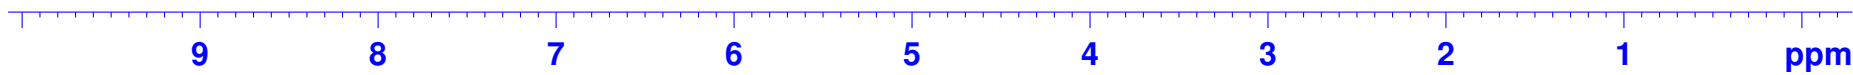

2.09  
3.12

0.99

0.99

9.12

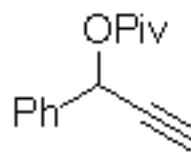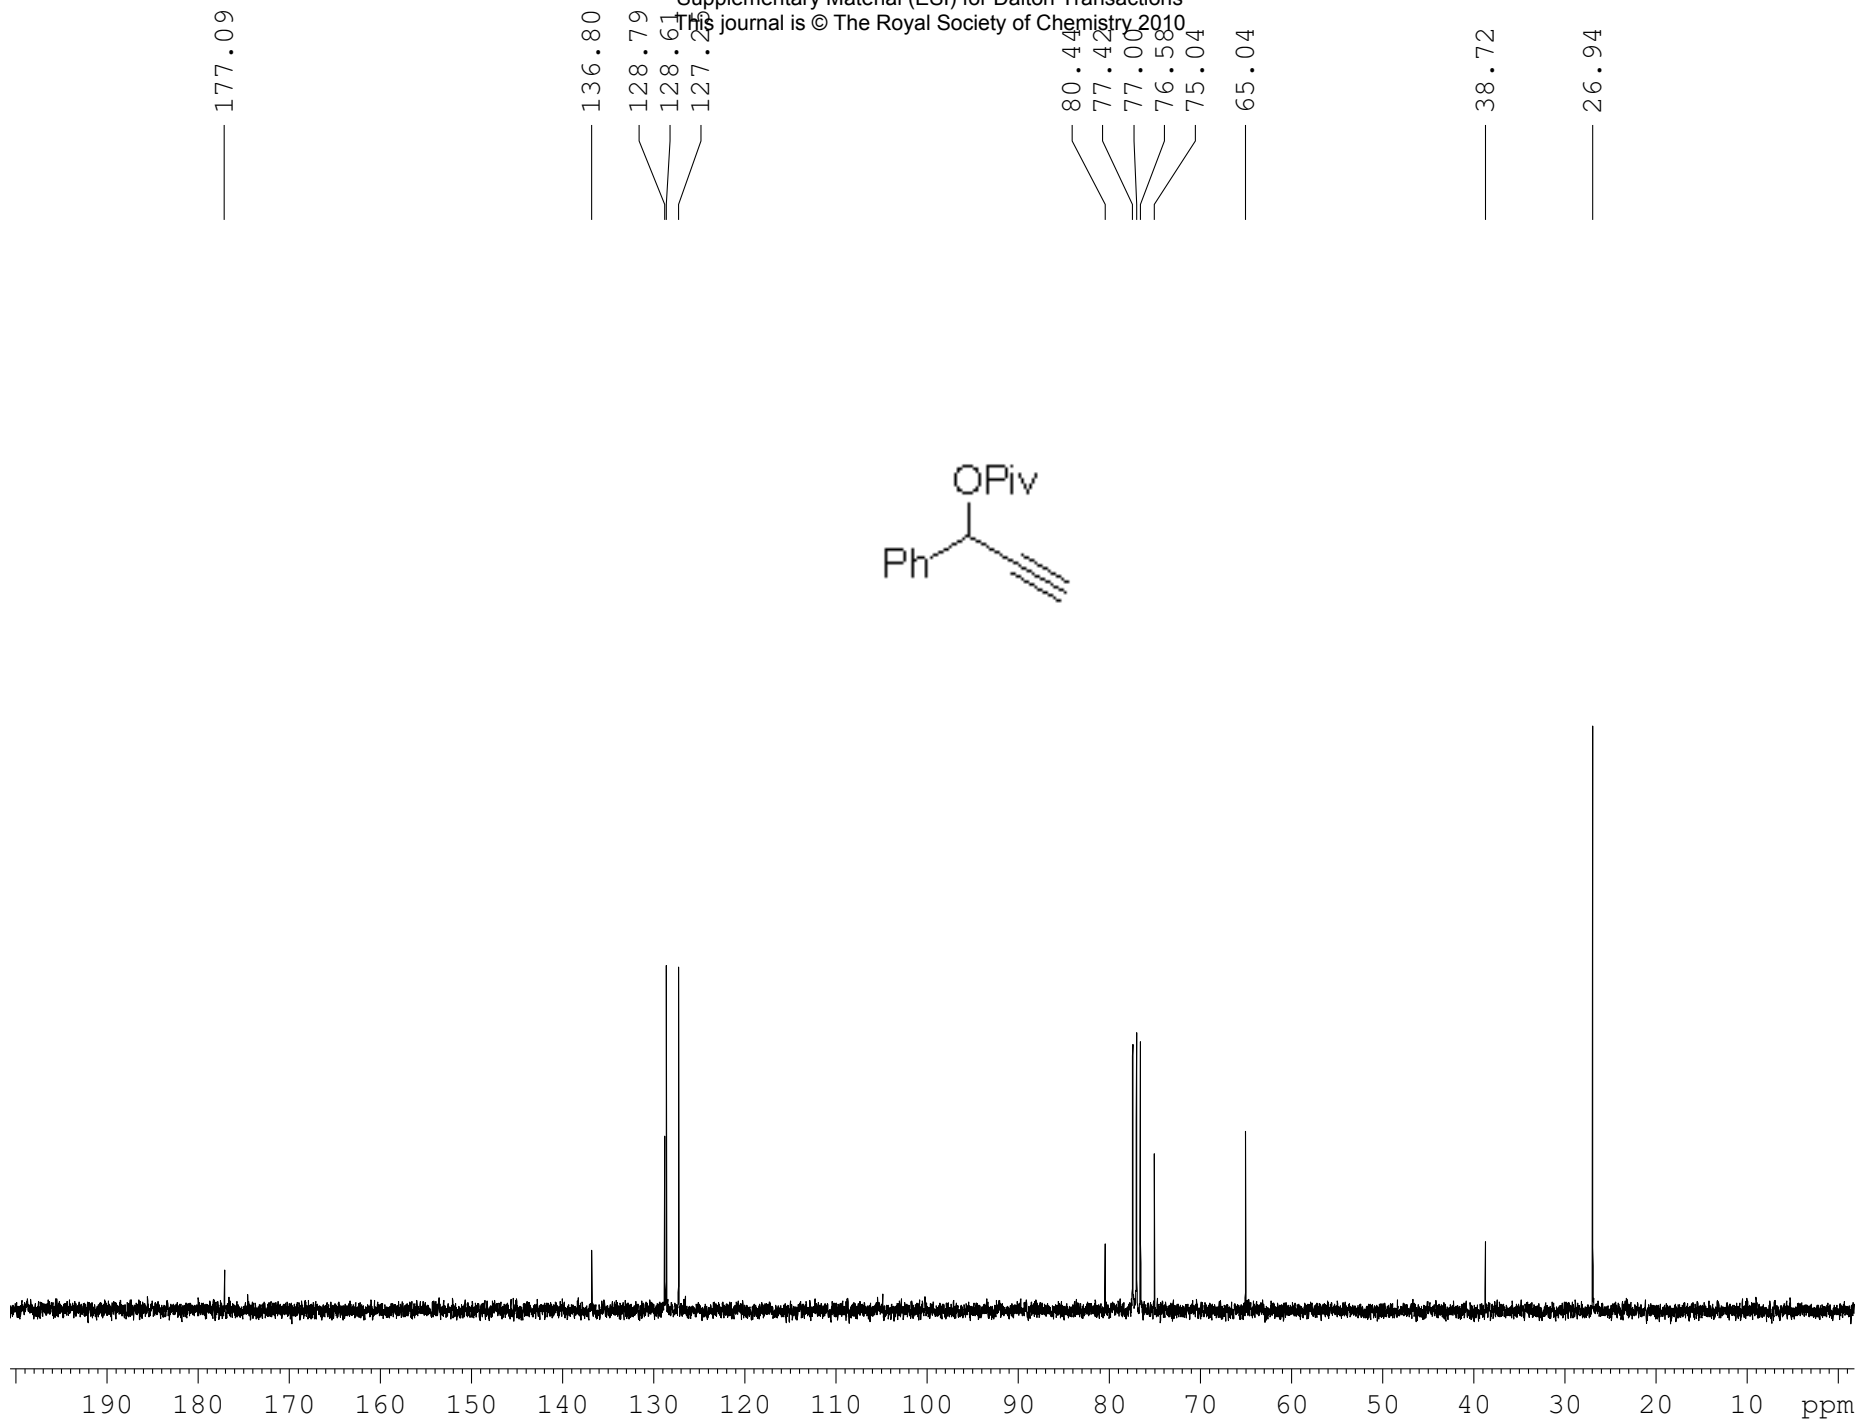

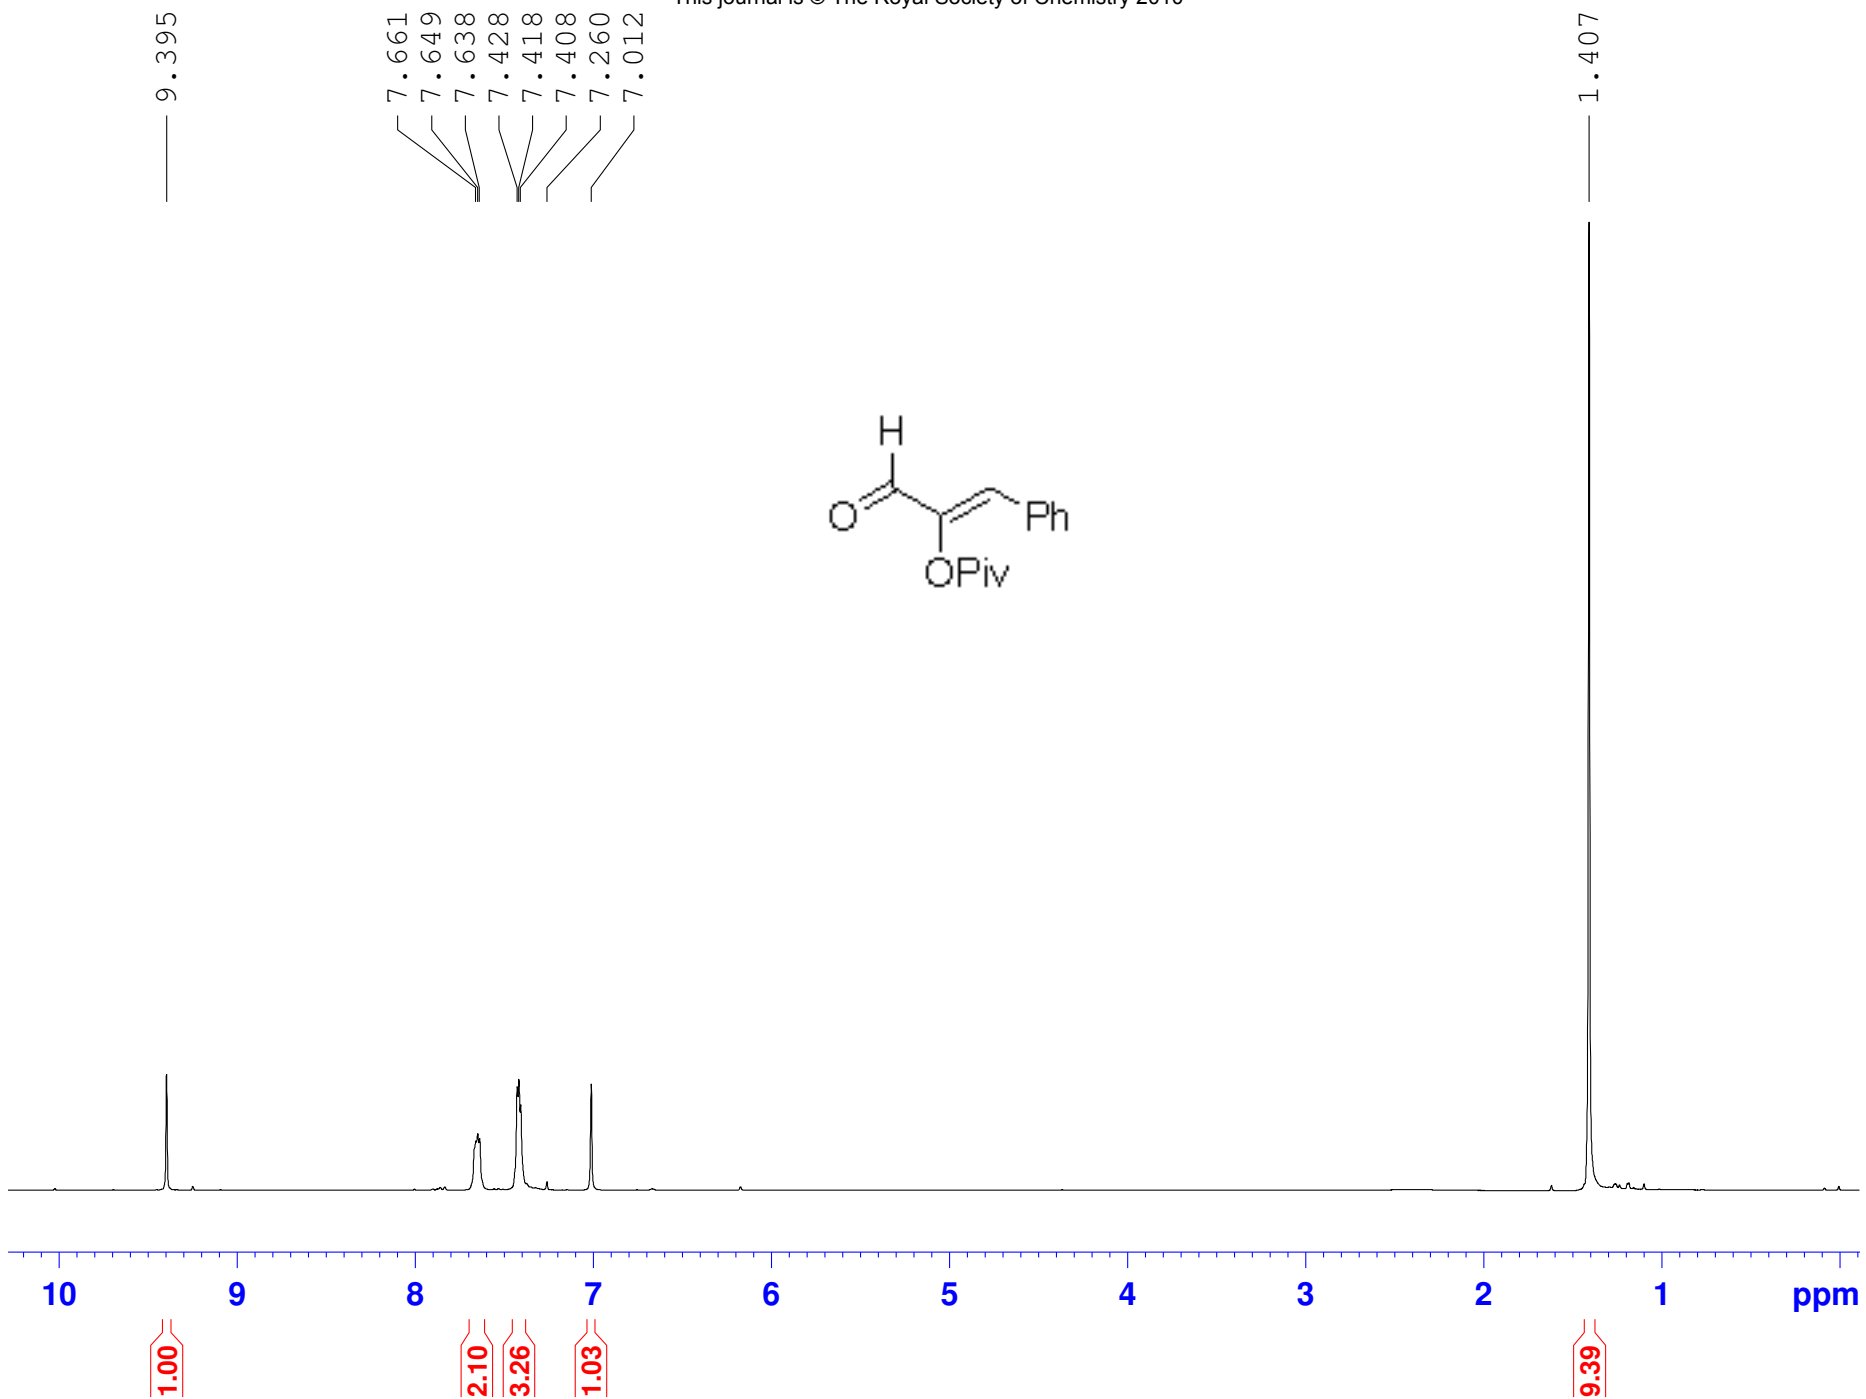

185.46

175.26

146.38

136.39

131.73

130.68

130.31

128.71

77.42

77.00

76.57

39.06

27.10

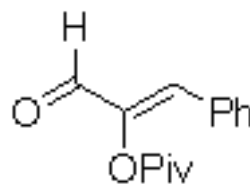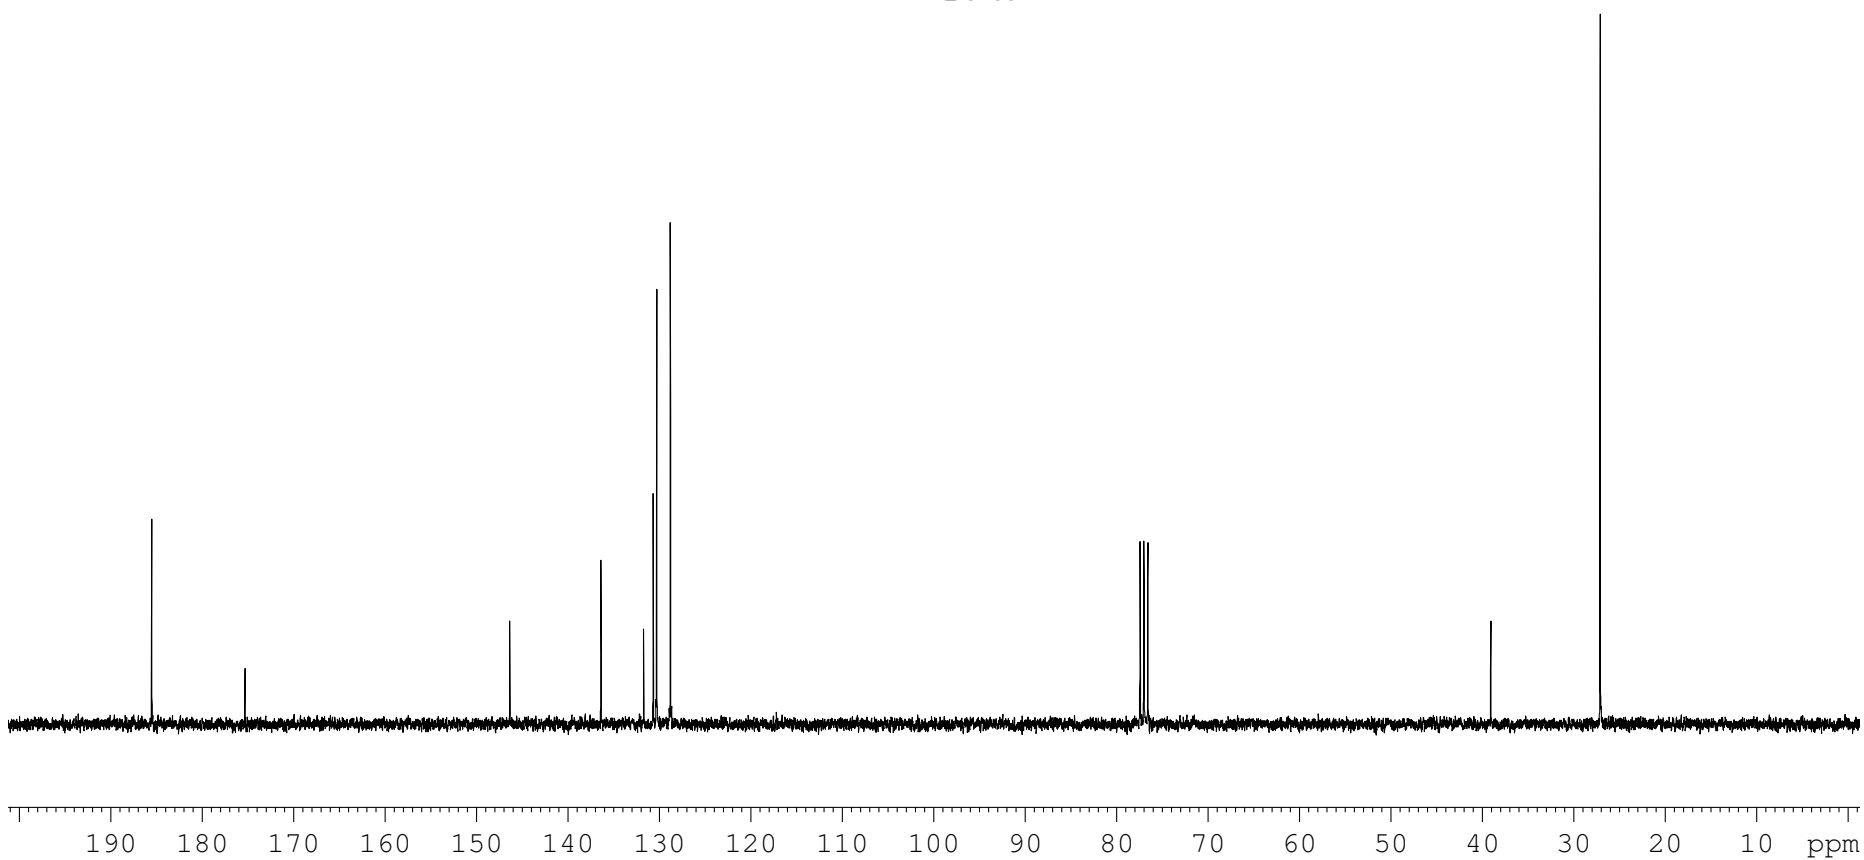

— 9.694

7.447  
7.424  
7.415  
7.387  
7.260

— 1.356

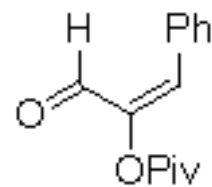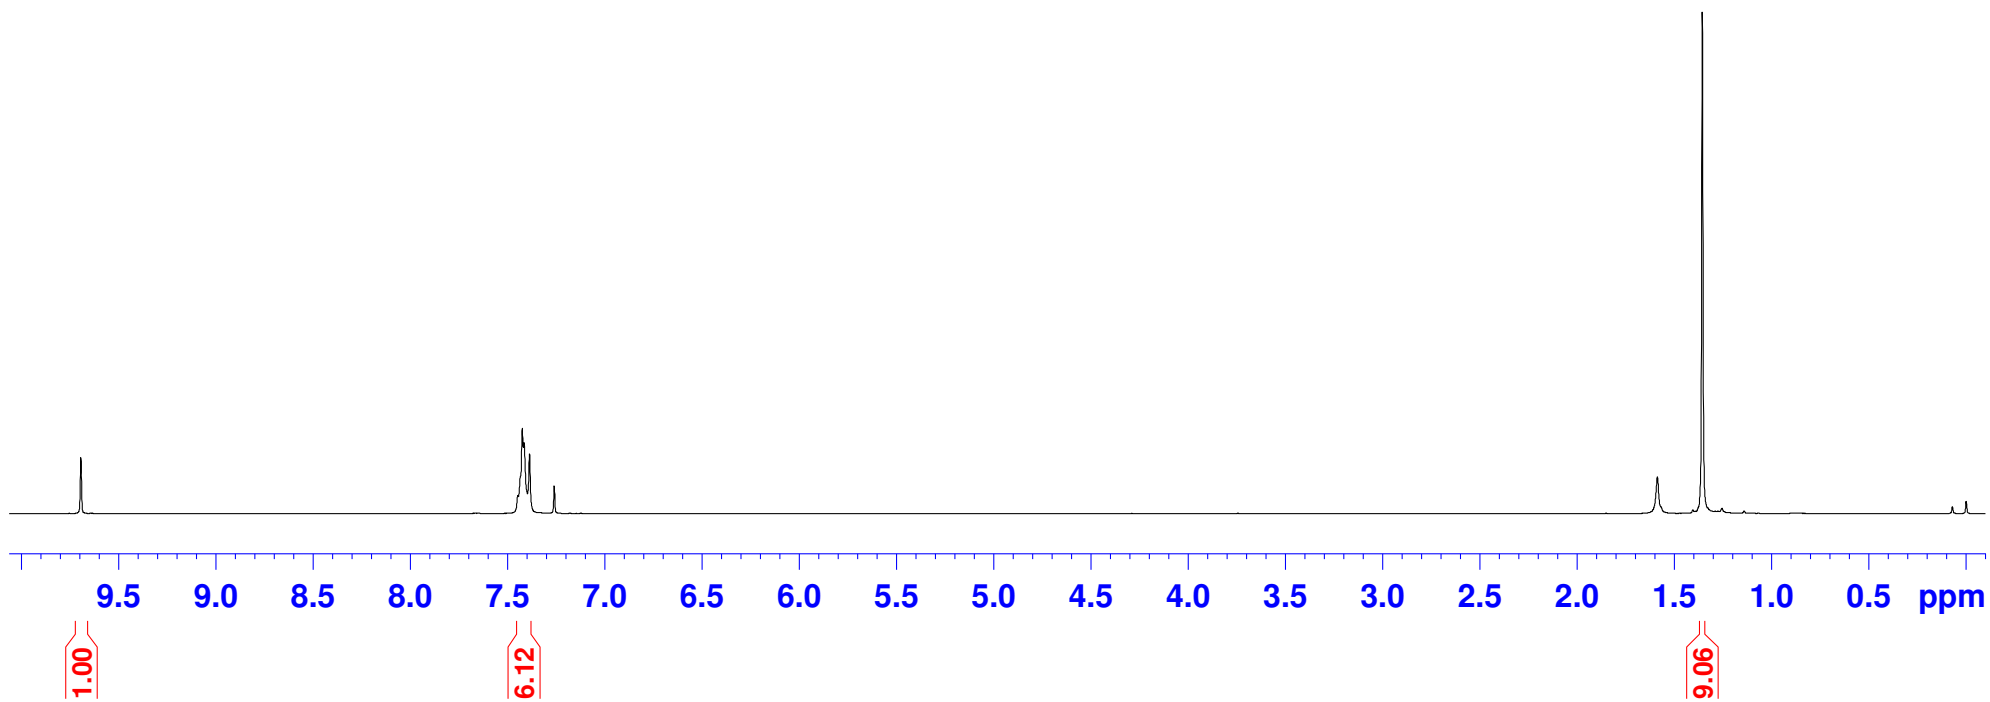

183.96

176.52

146.54

136.57

131.12

129.96

129.74

128.71

77.43

77.00

76.58

38.95

27.15

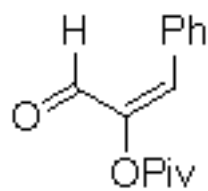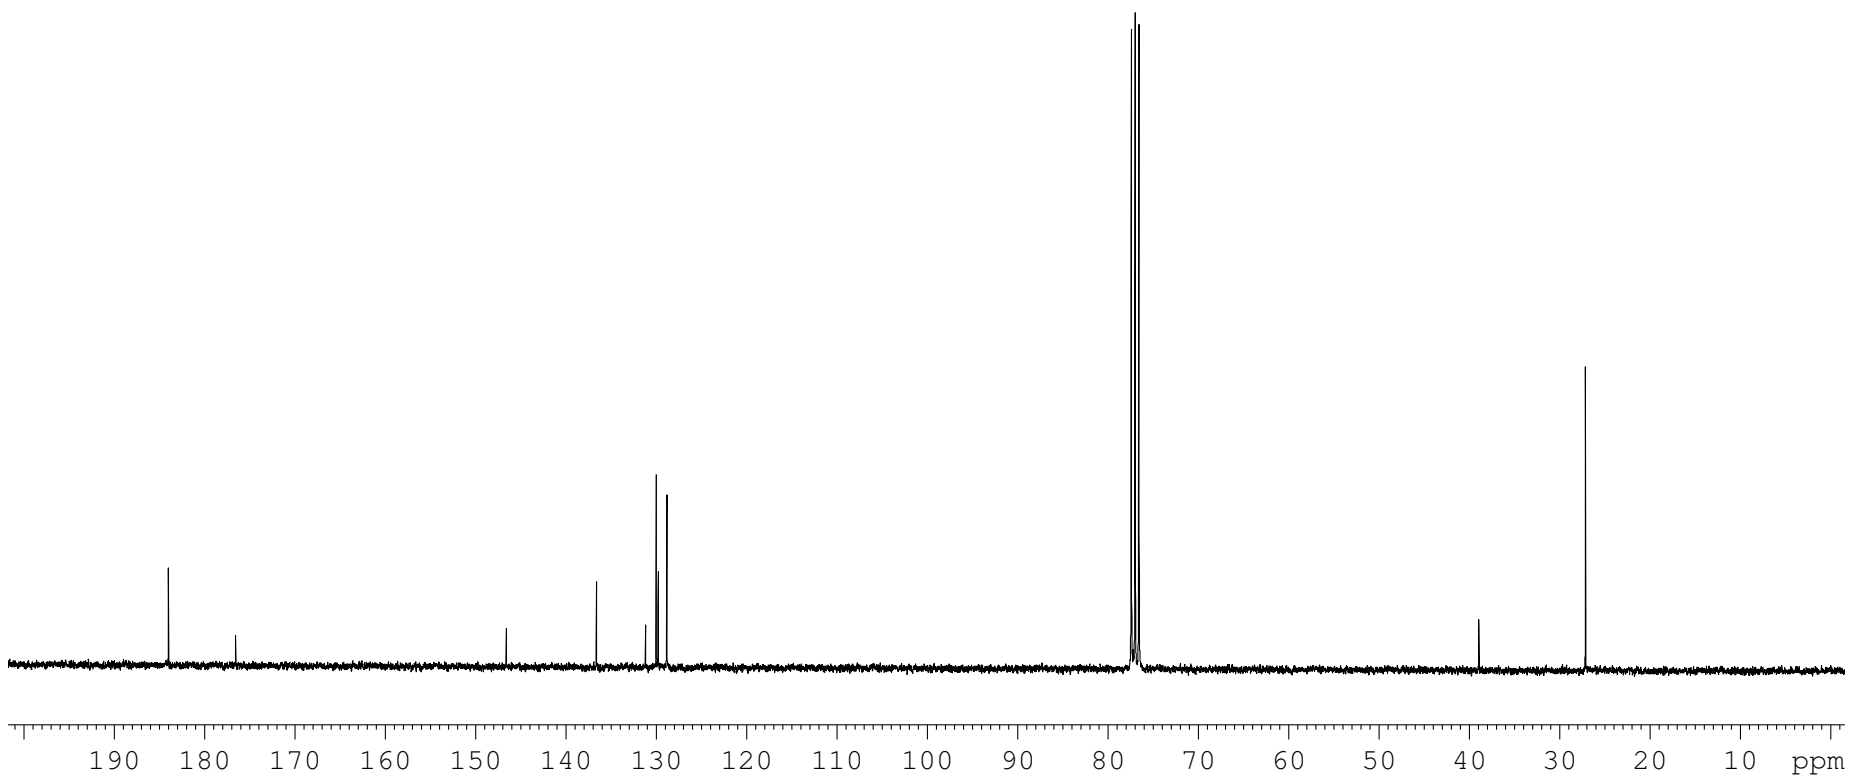

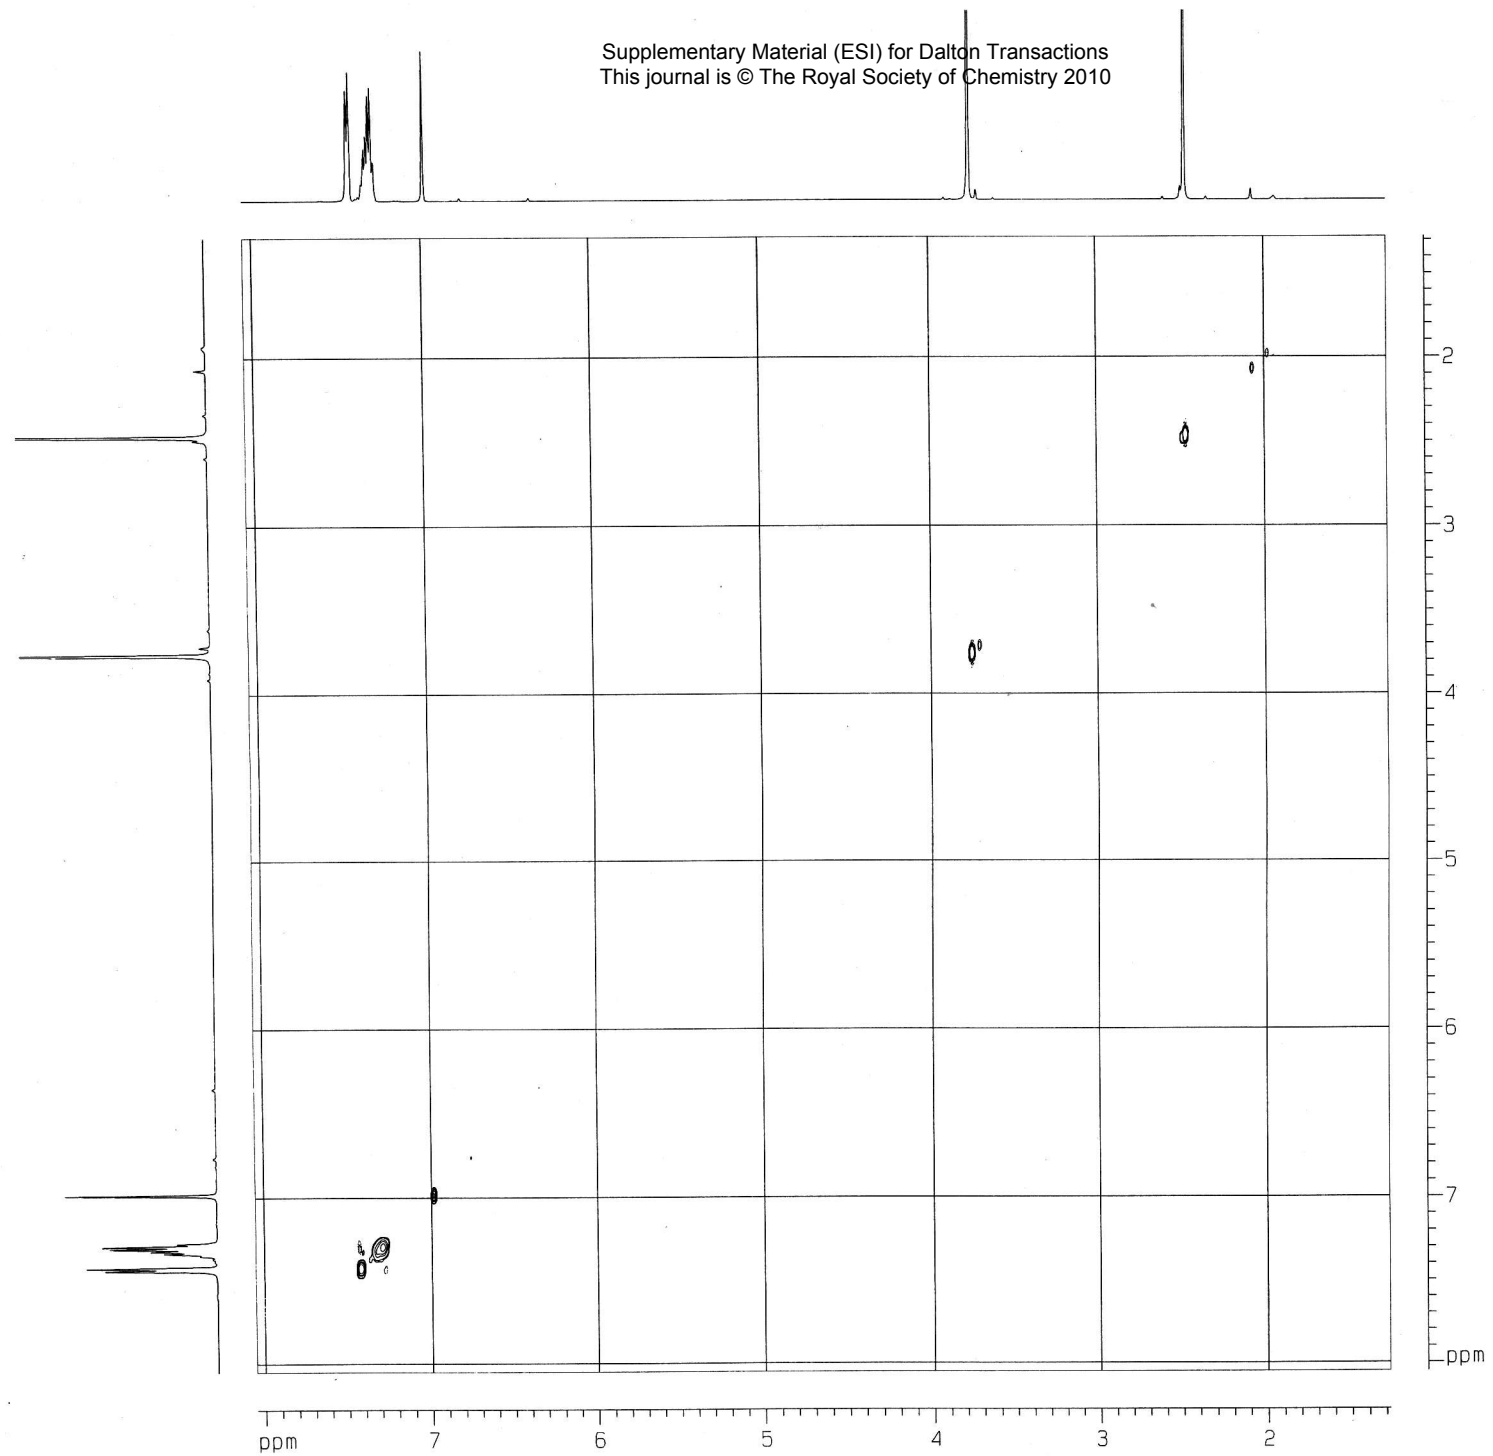

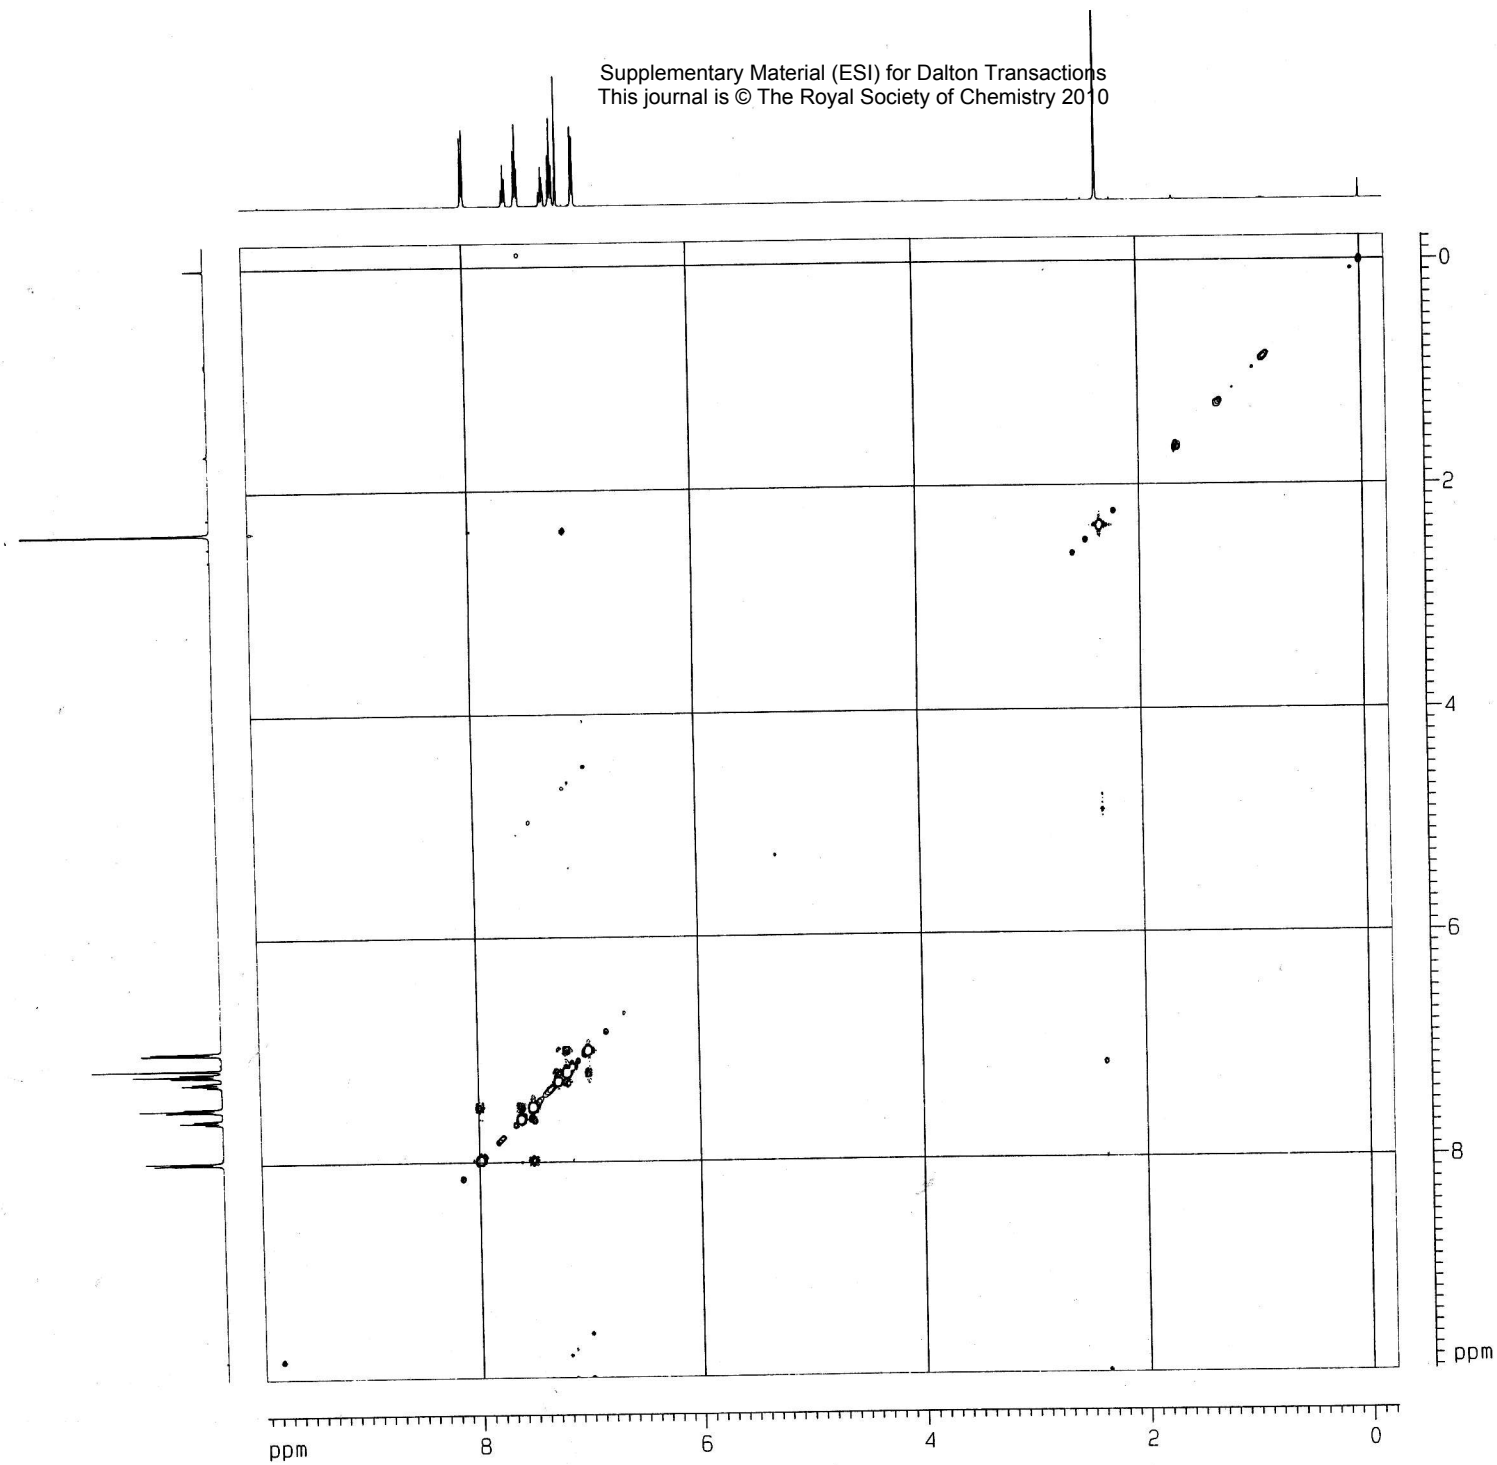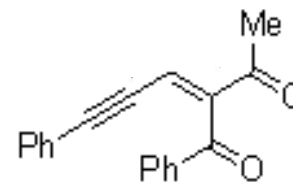

Supplement: c0dt00024h.pdf [file c0dt00024h.pdf]
